# Supplementary material for: Steroids from the Deep-Sea-Derived Fungus Penicillium granulatum MCCC 3A00475 Induced Apoptosis via Retinoid X Receptor (RXR)-α Pathway
Source: MDPI journal article supplement (doi:10.3390/md17030178), 2019-03-19

## Supplementary Materials

# Steroids from the Deep-Sea-Derived Fungus *Penicillium granulatum* MCCC 3A00475 Induced Apoptosis via Retinoid X Receptor (RXR)- $\alpha$ Pathway

Chun-Lan Xie <sup>1,2,†</sup>, Duo Zhang <sup>1,†</sup>, Jin-Mei Xia <sup>2</sup>, Chao-Chao Hu <sup>1</sup>, Ting Lin <sup>1</sup>, Yu-Kun Lin <sup>2</sup>, Guang-Hui Wang <sup>1</sup>, Wen-Jing Tian <sup>1</sup>, Zeng-Peng Li <sup>2</sup>, Xiao-Kun Zhang <sup>1,\*</sup>, Xian-Wen Yang <sup>2,\*</sup> and Hai-Feng Chen <sup>1,\*</sup>

<sup>1</sup> School of Pharmaceutical Sciences, Xiamen University, South Xiang'an Road, Xiamen, 361005, China; xiechunlanxx@163.com (C.-L.X.); 32320151154210@stu.xmu.edu.cn (D.Z.); 32320171153261@stu.xmu.edu.cn (C.-C.H.); linting@xmu.edu.cn (T.L.); guanghui@xmu.edu.cn (G.-H.W.); tianwj@xmu.edu.cn (W.-J.T.)

<sup>2</sup> Key Laboratory of Marine Biogenetic Resources, South China Sea Bio-Resource Exploitation and Utilization Collaborative Innovation Center, Third Institute of Oceanography, Ministry of Natural Resources, 184 Daxue Road, Xiamen 361005, China; xiajinmei@tio.org.cn (J.-M.X.); yukunlin223@163.com (Y.-K.L.); lizengpeng@tio.org.cn (Z.-P.L.)

\* Correspondence: xkzhang@xmu.edu.cn (X.-K.Z.); yangxianwen@tio.org.cn (X.-W.Y.); haifeng@xmu.edu.cn (H.-F.C.); Tel.: +86-592-2181851 (X.-K.Z.); +86-592-2195319 (X.-W.Y.); +86-592-592-2187225 (H.-F.C.)

† These authors contributed equally to this work.

## Contents

Figure S1. <sup>1</sup>H-NMR spectrum of penicisteroid D (1);  
Figure S2. <sup>13</sup>C-NMR spectrum of penicisteroid D (1);  
Figure S3. HSQC spectrum of the penicisteroid D (1);  
Figure S4. COSY spectrum of penicisteroid D (1);  
Figure S5. HMBC spectrum of penicisteroid D (1);  
Figure S6. NOESY spectrum of penicisteroid D (1).  
Figure S7. <sup>1</sup>H-NMR spectrum of penicisteroid E (2);  
Figure S8. <sup>13</sup>C-NMR spectrum of penicisteroid E (2);  
Figure S9. HSQC spectrum of penicisteroid E (2);  
Figure S10. COSY spectrum of penicisteroid E (2);  
Figure S11. HMBC spectrum of penicisteroid E (2);  
Figure S12. NOESY spectrum of penicisteroid E (2).  
Figure S13. <sup>1</sup>H-NMR spectrum of penicisteroid F (3);  
Figure S14. <sup>13</sup>C-NMR spectrum of penicisteroid F (3);  
Figure S15. HSQC spectrum of penicisteroid F (3);  
Figure S16. COSY spectrum of penicisteroid F (3);  
Figure S17. HMBC spectrum of penicisteroid F (3);  
Figure S18. NOESY spectrum of penicisteroid F (3).  
Figure S19. <sup>1</sup>H-NMR spectrum of penicisteroid G (4);  
Figure S20. <sup>13</sup>C-NMR spectrum of penicisteroid G (4);  
Figure S21. HSQC spectrum of penicisteroid G (4);  
Figure S22. COSY spectrum of penicisteroid G (4);  
Figure S23. HMBC spectrum of penicisteroid G (4);  
Figure S24. NOESY spectrum of penicisteroid G (4).  
Figure S25. <sup>1</sup>H-NMR spectrum of penicisteroid H (5);  
Figure S26. <sup>13</sup>C-NMR spectrum of penicisteroid H (5);  
Figure S27. HSQC spectrum of penicisteroid H (5);  
Figure S28. COSY spectrum of penicisteroid H (5);  
Figure S29. HMBC spectrum of penicisteroid H (5);  
Figure S30. NOESY spectrum of penicisteroid H (5).

**Table S1.** Crystal data and structure refinement for penicisteroid D (1).

|                                   |                                                   |                       |
|-----------------------------------|---------------------------------------------------|-----------------------|
| Identification code               | penicisteroid D                                   |                       |
| Empirical formula                 | C <sub>30</sub> H <sub>48</sub> O <sub>3</sub>    |                       |
| Formula weight                    | 456.68                                            |                       |
| Temperature                       | 99.98(11) K                                       |                       |
| Wavelength                        | 1.54184 Å                                         |                       |
| Crystal system                    | Orthorhombic                                      |                       |
| Space group                       | P2 <sub>1</sub> 2 <sub>1</sub> 2 <sub>1</sub>     |                       |
| Unit cell dimensions              | a = 5.94350(10) Å                                 | $\alpha = 90^\circ$ . |
|                                   | b = 11.98440(10) Å                                | $\beta = 90^\circ$    |
|                                   | c = 38.3459(4) Å                                  | $\gamma = 90^\circ$ . |
| Volume                            | 2731.35(6) Å <sup>3</sup>                         |                       |
| Z                                 | 4                                                 |                       |
| Density (calculated)              | 1.111 Mg/m <sup>3</sup>                           |                       |
| Absorption coefficient            | 0.533 mm <sup>-1</sup>                            |                       |
| F(000)                            | 1008                                              |                       |
| Crystal size                      | 0.15 × 0.12 × 0.05 mm <sup>3</sup>                |                       |
| Theta range for data collection   | 2.304 to 67.080°                                  |                       |
| Index ranges                      | −6 ≤ h ≤ 7, −14 ≤ k ≤ 14, −45 ≤ l ≤ 45            |                       |
| Reflections collected             | 18704                                             |                       |
| Independent reflections           | 4726 [R(int) = 0.0845]                            |                       |
| Completeness to theta = 67.080°   | 98.10%                                            |                       |
| Absorption correction             | Semi-empirical from equivalents                   |                       |
| Max. and min. transmission        | 1.00000 and 0.56522                               |                       |
| Refinement method                 | Full-matrix least-squares on F <sup>2</sup>       |                       |
| Data / restraints / parameters    | 4726/0/306                                        |                       |
| Goodness-of-fit on F <sup>2</sup> | 1.091                                             |                       |
| Final R indices [I > 2σ(I)]       | R <sub>1</sub> = 0.0797, wR <sub>2</sub> = 0.2359 |                       |
| R indices (all data)              | R <sub>1</sub> = 0.0842, wR <sub>2</sub> = 0.2490 |                       |
| Absolute structure parameter      | −0.06(15)                                         |                       |
| Extinction coefficient            | n/a                                               |                       |
| Largest diff. peak and hole       | 0.484 and −0.353 e.Å <sup>-3</sup>                |                       |

**Table S2.** Atomic coordinates ( $\times 10^4$ ) and equivalent isotropic displacement parameters ( $\text{\AA}^2 \times 10^3$ ) for penicisteroid D.  $U(\text{eq})$  is defined as one third of the trace of the orthogonalized  $U^{ij}$  tensor.

|        | x         | y        | z        | U(eq) |
|--------|-----------|----------|----------|-------|
| O(001) | −1724(6)  | −3598(2) | −6072(1) | 33(1) |
| O(002) | −3214(7)  | −5300(3) | −8968(1) | 39(1) |
| O(003) | −4416(8)  | −2368(3) | −5934(1) | 46(1) |
| C(004) | −2069(7)  | −4346(3) | −7288(1) | 28(1) |
| C(005) | −2605(8)  | −4365(3) | −8043(1) | 31(1) |
| C(006) | −3790(8)  | −3575(3) | −7462(1) | 32(1) |
| C(007) | −2782(7)  | −4605(3) | −6913(1) | 30(1) |
| C(008) | −3289(8)  | −3629(3) | −6666(1) | 31(1) |
| C(009) | −1311(9)  | −5884(4) | −6023(1) | 33(1) |
| C(00A) | −3268(8)  | −4184(3) | −6304(1) | 32(1) |
| C(00B) | −1165(8)  | −5362(3) | −6707(1) | 30(1) |
| C(00C) | −3292(8)  | −5425(4) | −8600(1) | 34(1) |
| C(00D) | −3693(8)  | −3605(3) | −7852(1) | 32(1) |
| C(00E) | −2658(9)  | −4313(4) | −8435(1) | 35(1) |
| C(00F) | −1913(7)  | −5463(3) | −7488(1) | 30(1) |
| C(00G) | −3305(9)  | −5345(4) | −5461(1) | 34(1) |
| C(00H) | −2523(10) | −2716(4) | −5900(1) | 39(1) |
| C(00I) | −1038(9)  | −6470(4) | −6907(1) | 32(1) |
| C(00J) | −1277(8)  | −5319(4) | −7876(1) | 32(1) |
| C(00K) | 1191(8)   | −4849(4) | −6664(1) | 33(1) |
| C(00L) | −260(10)  | −7029(4) | −6080(1) | 42(1) |
| C(00M) | −1730(9)  | −6334(4) | −8470(1) | 36(1) |
| C(00N) | −781(11)  | −2226(4) | −5661(1) | 44(1) |
| C(00O) | −5211(9)  | −5404(4) | −5204(1) | 36(1) |
| C(00P) | −1849(9)  | −6414(4) | −8073(1) | 32(1) |
| C(00Q) | −4386(9)  | −5467(4) | −4825(1) | 35(1) |
| C(00R) | −2432(8)  | −5396(4) | −6354(1) | 31(1) |
| C(00S) | −2619(10) | −6381(4) | −4777(1) | 43(1) |
| C(00T) | −3120(10) | −5966(4) | −5745(1) | 36(1) |
| C(00U) | −371(8)   | −6287(4) | −7291(1) | 34(1) |
| C(00V) | 1247(9)   | −5056(4) | −7923(1) | 36(1) |
| C(00W) | −6318(10) | −5667(4) | −4569(1) | 40(1) |
| C(00X) | −6773(10) | −4399(5) | −5265(1) | 45(1) |

**Table S3.** Bond lengths [Å] and angles [°] for penicisteroid D.

|               |          |                      |          |                      |          |
|---------------|----------|----------------------|----------|----------------------|----------|
| O(001)-C(00A) | 1.459(6) | C(00H)-O(001)-C(00A) | 117.4(4) | C(00V)-C(00J)-C(00F) | 111.9(4) |
| O(001)-C(00H) | 1.332(6) | C(00C)-O(002)-H(002) | 109.5    | C(00V)-C(00J)-C(00P) | 109.2(4) |
| O(002)-H(002) | 0.84     | C(006)-C(004)-H(004) | 109.5    | C(00B)-C(00K)-H(00N) | 109.5    |
| O(002)-C(00C) | 1.421(5) | C(006)-C(004)-C(007) | 110.3(4) | C(00B)-C(00K)-H(00O) | 109.5    |
| O(003)-C(00H) | 1.207(7) | C(006)-C(004)-C(00F) | 110.3(4) | C(00B)-C(00K)-H(00P) | 109.5    |
| C(004)-H(004) | 1        | C(007)-C(004)-H(004) | 109.5    | H(00N)-C(00K)-H(00O) | 109.5    |
| C(004)-C(006) | 1.530(6) | C(007)-C(004)-C(00F) | 107.8(3) | H(00N)-C(00K)-H(00P) | 109.5    |
| C(004)-C(007) | 1.532(6) | C(00F)-C(004)-H(004) | 109.5    | H(00O)-C(00K)-H(00P) | 109.5    |
| C(004)-C(00F) | 1.545(6) | C(00D)-C(005)-C(00E) | 120.6(4) | C(009)-C(00L)-H(00Q) | 109.5    |
| C(005)-C(00D) | 1.335(7) | C(00D)-C(005)-C(00J) | 122.0(4) | C(009)-C(00L)-H(00R) | 109.5    |
| C(005)-C(00E) | 1.503(7) | C(00E)-C(005)-C(00J) | 117.4(4) | C(009)-C(00L)-H(00S) | 109.5    |
| C(005)-C(00J) | 1.529(6) | C(004)-C(006)-H(00A) | 108.9    | H(00Q)-C(00L)-H(00R) | 109.5    |
| C(006)-H(00A) | 0.99     | C(004)-C(006)-H(00B) | 108.9    | H(00Q)-C(00L)-H(00S) | 109.5    |
| C(006)-H(00B) | 0.99     | H(00A)-C(006)-H(00B) | 107.7    | H(00R)-C(00L)-H(00S) | 109.5    |
| C(006)-C(00D) | 1.499(6) | C(00D)-C(006)-C(004) | 113.2(4) | C(00C)-C(00M)-H(00T) | 109.6    |
| C(007)-H(007) | 1        | C(00D)-C(006)-H(00A) | 108.9    | C(00C)-C(00M)-H(00U) | 109.6    |
| C(007)-C(008) | 1.535(6) | C(00D)-C(006)-H(00B) | 108.9    | C(00C)-C(00M)-C(00P) | 110.1(4) |
| C(007)-C(00B) | 1.539(6) | C(004)-C(007)-H(007) | 105.6    | H(00T)-C(00M)-H(00U) | 108.1    |
| C(008)-H(00C) | 0.99     | C(004)-C(007)-C(008) | 118.7(3) | C(00P)-C(00M)-H(00T) | 109.6    |
| C(008)-H(00D) | 0.99     | C(004)-C(007)-C(00B) | 115.4(4) | C(00P)-C(00M)-H(00U) | 109.6    |
| C(008)-C(00A) | 1.540(6) | C(008)-C(007)-H(007) | 105.6    | C(00H)-C(00N)-H(00V) | 109.5    |
| C(009)-H(009) | 1        | C(008)-C(007)-C(00B) | 104.8(3) | C(00H)-C(00N)-H(00W) | 109.5    |
| C(009)-C(00L) | 1.525(7) | C(00B)-C(007)-H(007) | 105.6    | C(00H)-C(00N)-H(00X) | 109.5    |
| C(009)-C(00R) | 1.548(6) | C(007)-C(008)-H(00C) | 111.2    | H(00V)-C(00N)-H(00W) | 109.5    |
| C(009)-C(00T) | 1.515(7) | C(007)-C(008)-H(00D) | 111.2    | H(00V)-C(00N)-H(00X) | 109.5    |
| C(00A)-H(00E) | 1        | C(007)-C(008)-C(00A) | 103.1(3) | H(00W)-C(00N)-H(00X) | 109.5    |
| C(00A)-C(00R) | 1.547(6) | H(00C)-C(008)-H(00D) | 109.1    | C(00G)-C(00O)-H(00Y) | 107.9    |
| C(00B)-C(00I) | 1.534(6) | C(00A)-C(008)-H(00C) | 111.2    | C(00G)-C(00O)-C(00Q) | 112.5(4) |
| C(00B)-C(00K) | 1.538(6) | C(00A)-C(008)-H(00D) | 111.2    | C(00G)-C(00O)-C(00X) | 108.5(4) |
| C(00B)-C(00R) | 1.552(6) | C(00L)-C(009)-H(009) | 108.9    | C(00Q)-C(00O)-H(00Y) | 107.9    |
| C(00C)-H(00F) | 1        | C(00L)-C(009)-C(00R) | 113.4(4) | C(00Q)-C(00O)-C(00X) | 112.1(4) |
| C(00C)-C(00E) | 1.522(6) | C(00R)-C(009)-H(009) | 108.9    | C(00X)-C(00O)-H(00Y) | 107.9    |
| C(00C)-C(00M) | 1.515(7) | C(00T)-C(009)-H(009) | 108.9    | C(00J)-C(00P)-H(00Z) | 108.6    |
| C(00D)-H(00G) | 0.95     | C(00T)-C(009)-C(00L) | 109.5(4) | C(00J)-C(00P)-H      | 108.6    |
| C(00E)-H(00H) | 0.99     | C(00T)-C(009)-C(00R) | 107.1(4) | C(00M)-C(00P)-C(00J) | 114.8(4) |
| C(00E)-H(00I) | 0.99     | O(001)-C(00A)-C(008) | 110.4(4) | C(00M)-C(00P)-H(00Z) | 108.6    |
| C(00F)-H(00J) | 1        | O(001)-C(00A)-H(00E) | 110.1    | C(00M)-C(00P)-H      | 108.6    |

|               |          |                      |          |                      |          |
|---------------|----------|----------------------|----------|----------------------|----------|
| C(00F)-C(00J) | 1.547(6) | O(001)-C(00A)-C(00R) | 109.0(4) | H(00Z)-C(00P)-H      | 107.5    |
| C(00F)-C(00U) | 1.545(6) | C(008)-C(00A)-H(00E) | 110.1    | C(00O)-C(00Q)-H(00)  | 108      |
| C(00G)-H(00K) | 0.95     | C(008)-C(00A)-C(00R) | 107.3(3) | C(00S)-C(00Q)-C(00O) | 111.6(4) |
| C(00G)-C(00O) | 1.504(7) | C(00R)-C(00A)-H(00E) | 110.1    | C(00S)-C(00Q)-H(00)  | 108      |
| C(00G)-C(00T) | 1.324(7) | C(007)-C(00B)-C(00R) | 99.2(3)  | C(00S)-C(00Q)-C(00W) | 109.1(4) |
| C(00H)-C(00N) | 1.501(8) | C(00I)-C(00B)-C(007) | 106.6(3) | C(00W)-C(00Q)-C(00O) | 112.0(4) |
| C(00I)-H(00L) | 0.99     | C(00I)-C(00B)-C(00K) | 110.8(4) | C(00W)-C(00Q)-H(00)  | 108      |
| C(00I)-H(00M) | 0.99     | C(00I)-C(00B)-C(00R) | 115.9(3) | C(009)-C(00R)-C(00B) | 121.2(4) |
| C(00I)-C(00U) | 1.541(6) | C(00K)-C(00B)-C(007) | 112.8(3) | C(009)-C(00R)-H(0AA) | 105.9    |
| C(00J)-C(00P) | 1.551(6) | C(00K)-C(00B)-C(00R) | 111.0(4) | C(00A)-C(00R)-C(009) | 113.1(4) |
| C(00J)-C(00V) | 1.543(7) | O(002)-C(00C)-H(00F) | 108.7    | C(00A)-C(00R)-C(00B) | 103.8(3) |
| C(00K)-H(00N) | 0.98     | O(002)-C(00C)-C(00E) | 108.2(3) | C(00A)-C(00R)-H(0AA) | 105.9    |
| C(00K)-H(00O) | 0.98     | O(002)-C(00C)-C(00M) | 112.4(4) | C(00B)-C(00R)-H(0AA) | 105.9    |
| C(00K)-H(00P) | 0.98     | C(00E)-C(00C)-H(00F) | 108.7    | C(00Q)-C(00S)-H(1AA) | 109.5    |
| C(00L)-H(00Q) | 0.98     | C(00M)-C(00C)-H(00F) | 108.7    | C(00Q)-C(00S)-HA     | 109.5    |
| C(00L)-H(00R) | 0.98     | C(00M)-C(00C)-C(00E) | 110.0(4) | C(00Q)-C(00S)-HB     | 109.5    |
| C(00L)-H(00S) | 0.98     | C(005)-C(00D)-C(006) | 125.7(4) | H(1AA)-C(00S)-HA     | 109.5    |
| C(00M)-H(00T) | 0.99     | C(005)-C(00D)-H(00G) | 117.2    | H(1AA)-C(00S)-HB     | 109.5    |
| C(00M)-H(00U) | 0.99     | C(006)-C(00D)-H(00G) | 117.2    | HA-C(00S)-HB         | 109.5    |
| C(00M)-C(00P) | 1.528(6) | C(005)-C(00E)-C(00C) | 112.5(3) | C(009)-C(00T)-H(2AA) | 116.6    |
| C(00N)-H(00V) | 0.98     | C(005)-C(00E)-H(00H) | 109.1    | C(00G)-C(00T)-C(009) | 126.8(5) |
| C(00N)-H(00W) | 0.98     | C(005)-C(00E)-H(00I) | 109.1    | C(00G)-C(00T)-H(2AA) | 116.6    |
| C(00N)-H(00X) | 0.98     | C(00C)-C(00E)-H(00H) | 109.1    | C(00F)-C(00U)-H(3AA) | 108.8    |
| C(00O)-H(00Y) | 1        | C(00C)-C(00E)-H(00I) | 109.1    | C(00F)-C(00U)-HC     | 108.8    |
| C(00O)-C(00Q) | 1.537(7) | H(00H)-C(00E)-H(00I) | 107.8    | C(00I)-C(00U)-C(00F) | 114.0(4) |
| C(00O)-C(00X) | 1.539(7) | C(004)-C(00F)-H(00J) | 106.4    | C(00I)-C(00U)-H(3AA) | 108.8    |
| C(00P)-H(00Z) | 0.99     | C(004)-C(00F)-C(00J) | 113.3(3) | C(00I)-C(00U)-HC     | 108.8    |
| C(00P)-H      | 0.99     | C(00J)-C(00F)-H(00J) | 106.4    | H(3AA)-C(00U)-HC     | 107.7    |
| C(00Q)-H(00)  | 1        | C(00U)-C(00F)-C(004) | 110.3(4) | C(00J)-C(00V)-H(4AA) | 109.5    |
| C(00Q)-C(00S) | 1.528(7) | C(00U)-C(00F)-H(00J) | 106.4    | C(00J)-C(00V)-HD     | 109.5    |
| C(00Q)-C(00W) | 1.530(7) | C(00U)-C(00F)-C(00J) | 113.4(4) | C(00J)-C(00V)-HE     | 109.5    |
| C(00R)-H(0AA) | 1        | C(00O)-C(00G)-H(00K) | 117.4    | H(4AA)-C(00V)-HD     | 109.5    |
| C(00S)-H(1AA) | 0.98     | C(00T)-C(00G)-H(00K) | 117.4    | H(4AA)-C(00V)-HE     | 109.5    |
| C(00S)-HA     | 0.98     | C(00T)-C(00G)-C(00O) | 125.2(5) | HD-C(00V)-HE         | 109.5    |
| C(00S)-HB     | 0.98     | O(001)-C(00H)-C(00N) | 111.4(5) | C(00Q)-C(00W)-H(5AA) | 109.5    |
| C(00T)-H(2AA) | 0.95     | O(003)-C(00H)-O(001) | 123.6(5) | C(00Q)-C(00W)-HF     | 109.5    |
| C(00U)-H(3AA) | 0.99     | O(003)-C(00H)-C(00N) | 125.0(5) | C(00Q)-C(00W)-HG     | 109.5    |
| C(00U)-HC     | 0.99     | C(00B)-C(00I)-H(00L) | 109.3    | H(5AA)-C(00W)-HF     | 109.5    |

|               |      |                      |          |                      |       |
|---------------|------|----------------------|----------|----------------------|-------|
| C(00V)-H(4AA) | 0.98 | C(00B)-C(00I)-H(00M) | 109.3    | H(5AA)-C(00W)-HG     | 109.5 |
| C(00V)-HD     | 0.98 | C(00B)-C(00I)-C(00U) | 111.4(3) | HF-C(00W)-HG         | 109.5 |
| C(00V)-HE     | 0.98 | H(00L)-C(00I)-H(00M) | 108      | C(00O)-C(00X)-H(6AA) | 109.5 |
| C(00W)-H(5AA) | 0.98 | C(00U)-C(00I)-H(00L) | 109.3    | C(00O)-C(00X)-HH     | 109.5 |
| C(00W)-HF     | 0.98 | C(00U)-C(00I)-H(00M) | 109.3    | C(00O)-C(00X)-HI     | 109.5 |
| C(00W)-HG     | 0.98 | C(005)-C(00J)-C(00F) | 111.1(4) | H(6AA)-C(00X)-HH     | 109.5 |
| C(00X)-H(6AA) | 0.98 | C(005)-C(00J)-C(00P) | 108.4(4) | H(6AA)-C(00X)-HI     | 109.5 |
| C(00X)-HH     | 0.98 | C(005)-C(00J)-C(00V) | 107.5(4) | HH-C(00X)-HI         | 109.5 |
| C(00X)-HI     | 0.98 | C(00F)-C(00J)-C(00P) | 108.6(3) |                      |       |

---

Symmetry transformations used to generate equivalent atoms.

**Table S4.** Anisotropic displacement parameters ( $\text{\AA}^2 \times 10^3$ ) for penicisteroid D. The anisotropic displacement factor exponent takes the form:  $-2\pi^2 [h^2 a^{*2} U^{11} + \dots + 2 h k a^* b^* U^{12}]$ .

|        | U11   | U22   | U33   | U23   | U13   | U12   |
|--------|-------|-------|-------|-------|-------|-------|
| O(001) | 35(2) | 31(1) | 33(2) | −3(1) | −2(1) | 0(1)  |
| O(002) | 46(2) | 38(2) | 33(2) | 1(1)  | 3(1)  | −6(2) |
| O(003) | 54(2) | 40(2) | 45(2) | −8(1) | −4(2) | 14(2) |
| C(004) | 24(2) | 28(2) | 32(2) | 1(2)  | −1(2) | 0(2)  |
| C(005) | 26(2) | 28(2) | 39(2) | 1(2)  | 2(2)  | −5(2) |
| C(006) | 28(2) | 27(2) | 40(2) | −3(2) | −2(2) | 3(2)  |
| C(007) | 23(2) | 27(2) | 40(2) | −3(2) | 2(2)  | −2(2) |
| C(008) | 30(2) | 27(2) | 36(2) | −1(2) | −2(2) | 2(2)  |
| C(009) | 38(3) | 34(2) | 28(2) | 0(2)  | 0(2)  | 0(2)  |
| C(00A) | 31(2) | 32(2) | 32(2) | −3(2) | 1(2)  | −1(2) |
| C(00B) | 32(2) | 29(2) | 28(2) | 0(2)  | 4(2)  | 0(2)  |
| C(00C) | 32(2) | 35(2) | 35(2) | 1(2)  | 1(2)  | −5(2) |
| C(00D) | 33(2) | 28(2) | 34(2) | 3(2)  | −2(2) | −2(2) |
| C(00E) | 36(2) | 30(2) | 39(2) | 4(2)  | 1(2)  | −1(2) |
| C(00F) | 22(2) | 29(2) | 40(2) | 1(2)  | 0(2)  | −1(2) |
| C(00G) | 38(2) | 32(2) | 32(2) | 2(2)  | 1(2)  | 1(2)  |
| C(00H) | 55(3) | 27(2) | 34(2) | 0(2)  | −5(2) | 3(2)  |
| C(00I) | 34(2) | 29(2) | 35(2) | 0(2)  | −1(2) | 3(2)  |
| C(00J) | 31(2) | 30(2) | 36(2) | −1(2) | 1(2)  | 2(2)  |
| C(00K) | 28(2) | 35(2) | 36(2) | 1(2)  | −1(2) | 3(2)  |
| C(00L) | 50(3) | 38(2) | 38(2) | 2(2)  | 0(2)  | 8(2)  |
| C(00M) | 40(3) | 31(2) | 36(2) | −3(2) | 5(2)  | −2(2) |
| C(00N) | 57(3) | 34(2) | 41(3) | −5(2) | −6(2) | −1(2) |
| C(00O) | 38(2) | 34(2) | 37(2) | −2(2) | 2(2)  | −1(2) |
| C(00P) | 38(2) | 30(2) | 29(2) | 0(2)  | 2(2)  | 2(2)  |
| C(00Q) | 41(3) | 31(2) | 32(2) | −1(2) | −3(2) | −1(2) |
| C(00R) | 27(2) | 30(2) | 35(2) | −2(2) | 1(2)  | −3(2) |
| C(00S) | 46(3) | 43(2) | 40(2) | 4(2)  | 0(2)  | 6(2)  |
| C(00T) | 45(3) | 33(2) | 30(2) | 2(2)  | 0(2)  | −1(2) |
| C(00U) | 37(3) | 30(2) | 35(2) | −2(2) | 4(2)  | 7(2)  |
| C(00V) | 33(3) | 46(2) | 29(2) | −1(2) | −2(2) | 0(2)  |
| C(00W) | 48(3) | 38(2) | 35(2) | 0(2)  | 5(2)  | −3(2) |
| C(00X) | 41(3) | 52(3) | 41(3) | 4(2)  | 2(2)  | 9(2)  |



**Table S5.** Hydrogen coordinates ( $\times 10^4$ ) and isotropic displacement parameters ( $\text{\AA}^2 \times 10^{-3}$ ) for penicisteroid D.

|        | x     | y     | z     | U(eq) |        | x     | y     | z     | U(eq) |
|--------|-------|-------|-------|-------|--------|-------|-------|-------|-------|
| H(002) | −3899 | −5833 | −9062 | 58    | H(00U) | −2168 | −7057 | −8574 | 43    |
| H(004) | −562  | −3975 | −7287 | 34    | H(00V) | 542   | −2714 | −5656 | 66    |
| H(00A) | −5319 | −3794 | −7386 | 38    | H(00W) | −1405 | −2158 | −5426 | 66    |
| H(00B) | −3523 | −2801 | −7382 | 38    | H(00X) | −344  | −1487 | −5747 | 66    |
| H(007) | −4220 | −5033 | −6933 | 36    | H(00Y) | −6089 | −6097 | −5254 | 44    |
| H(00C) | −4776 | −3296 | −6717 | 38    | H(00Z) | −797  | −7003 | −7994 | 39    |
| H(00D) | −2120 | −3044 | −6683 | 38    | H      | −3387 | −6649 | −8006 | 39    |
| H(009) | −118  | −5356 | −5941 | 40    | H(00)  | −3672 | −4736 | −4765 | 42    |
| H(00E) | −4819 | −4185 | −6203 | 38    | H(0AA) | −3810 | −5856 | −6395 | 37    |
| H(00F) | −4867 | −5616 | −8530 | 41    | H(1AA) | −3277 | −7106 | −4837 | 64    |
| H(00G) | −4472 | −3034 | −7975 | 38    | HA     | −2115 | −6392 | −4534 | 64    |
| H(00H) | −1158 | −4084 | −8521 | 42    | HB     | −1333 | −6231 | −4930 | 64    |
| H(00I) | −3757 | −3739 | −8509 | 42    | H(2AA) | −4238 | −6522 | −5779 | 43    |
| H(00J) | −3456 | −5795 | −7484 | 36    | H(3AA) | −400  | −7014 | −7413 | 41    |
| H(00K) | −2142 | −4821 | −5417 | 41    | HC     | 1193  | −6003 | −7299 | 41    |
| H(00L) | −2519 | −6847 | −6897 | 39    | H(4AA) | 1533  | −4838 | −8166 | 54    |
| H(00M) | 82    | −6963 | −6794 | 39    | HD     | 2137  | −5720 | −7867 | 54    |
| H(00N) | 1812  | −4671 | −6894 | 49    | HE     | 1674  | −4444 | −7767 | 54    |
| H(00O) | 2178  | −5384 | −6546 | 49    | H(5AA) | −7480 | −5097 | −4603 | 60    |
| H(00P) | 1083  | −4166 | −6525 | 49    | HF     | −5748 | −5625 | −4329 | 60    |
| H(00Q) | −1405 | −7544 | −6170 | 63    | HG     | −6965 | −6408 | −4610 | 60    |
| H(00R) | 334   | −7313 | −5859 | 63    | H(6AA) | −5985 | −3709 | −5202 | 67    |
| H(00S) | 967   | −6967 | −6250 | 63    | HH     | −8126 | −4477 | −5121 | 67    |
| H(00T) | −168  | −6165 | −8542 | 43    | HI     | −7204 | −4369 | −5512 | 67    |

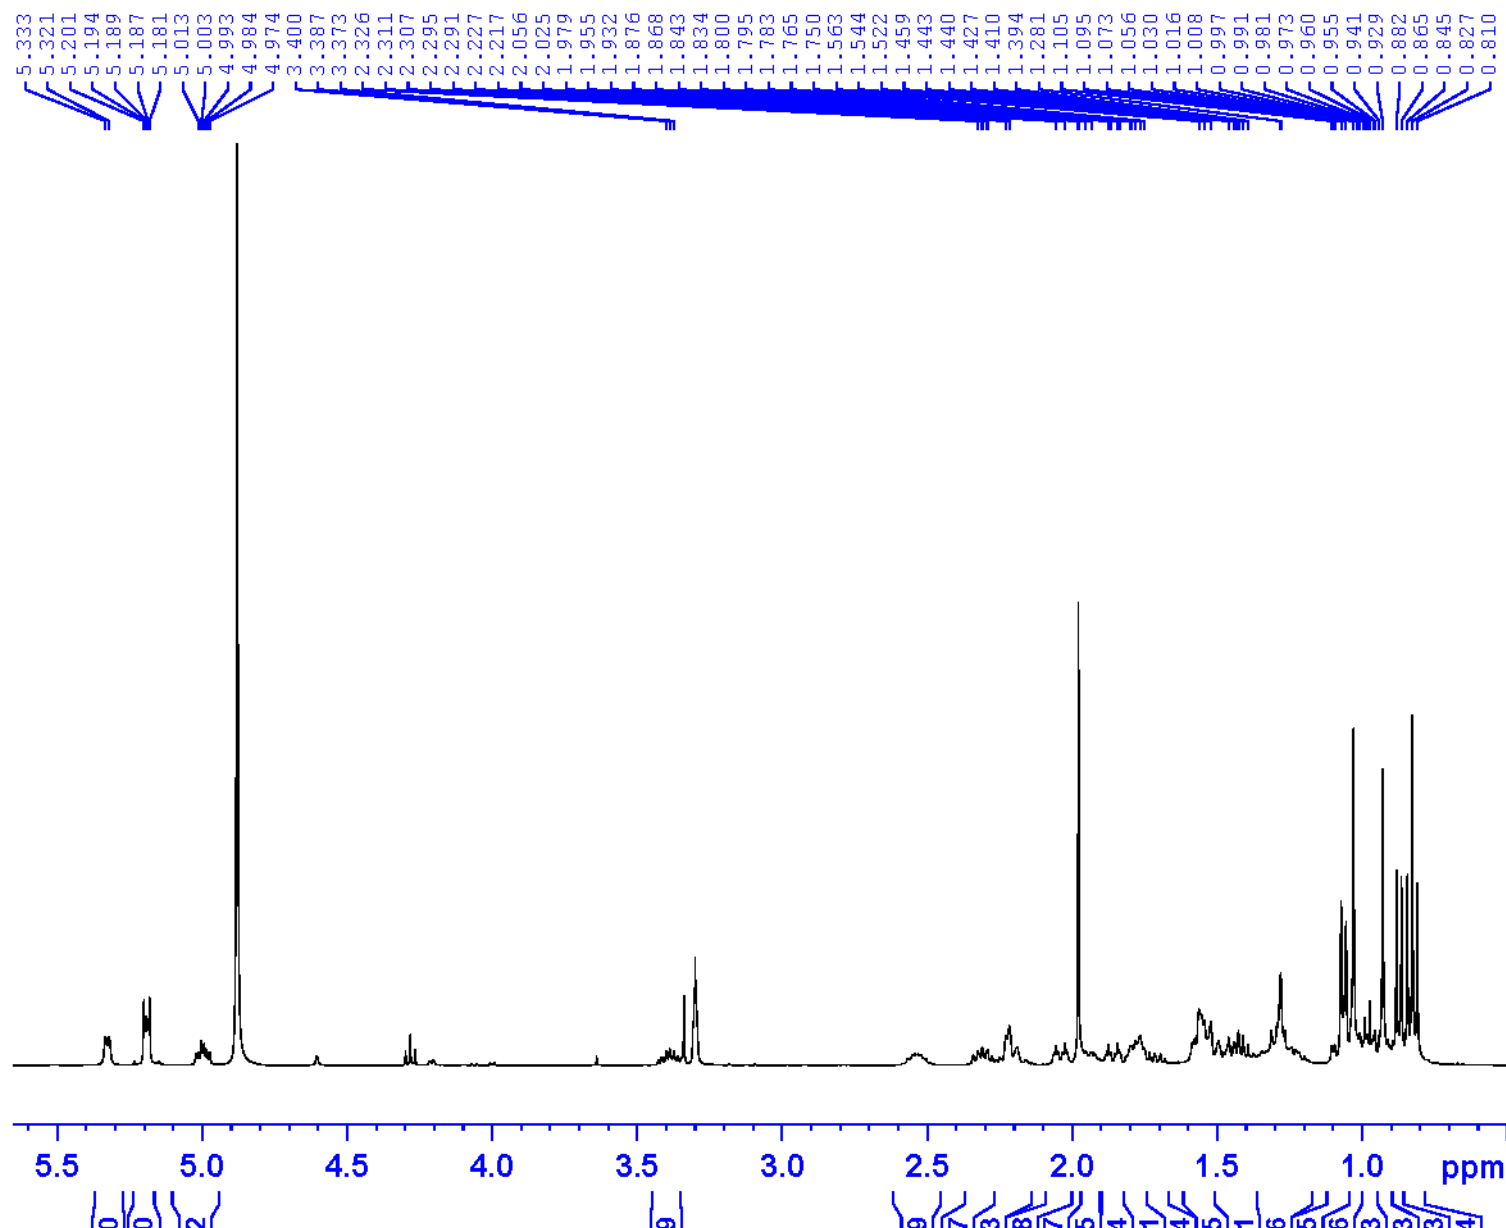

Figure S2. <sup>13</sup>C-NMR spectrum of penicisteroid D (1)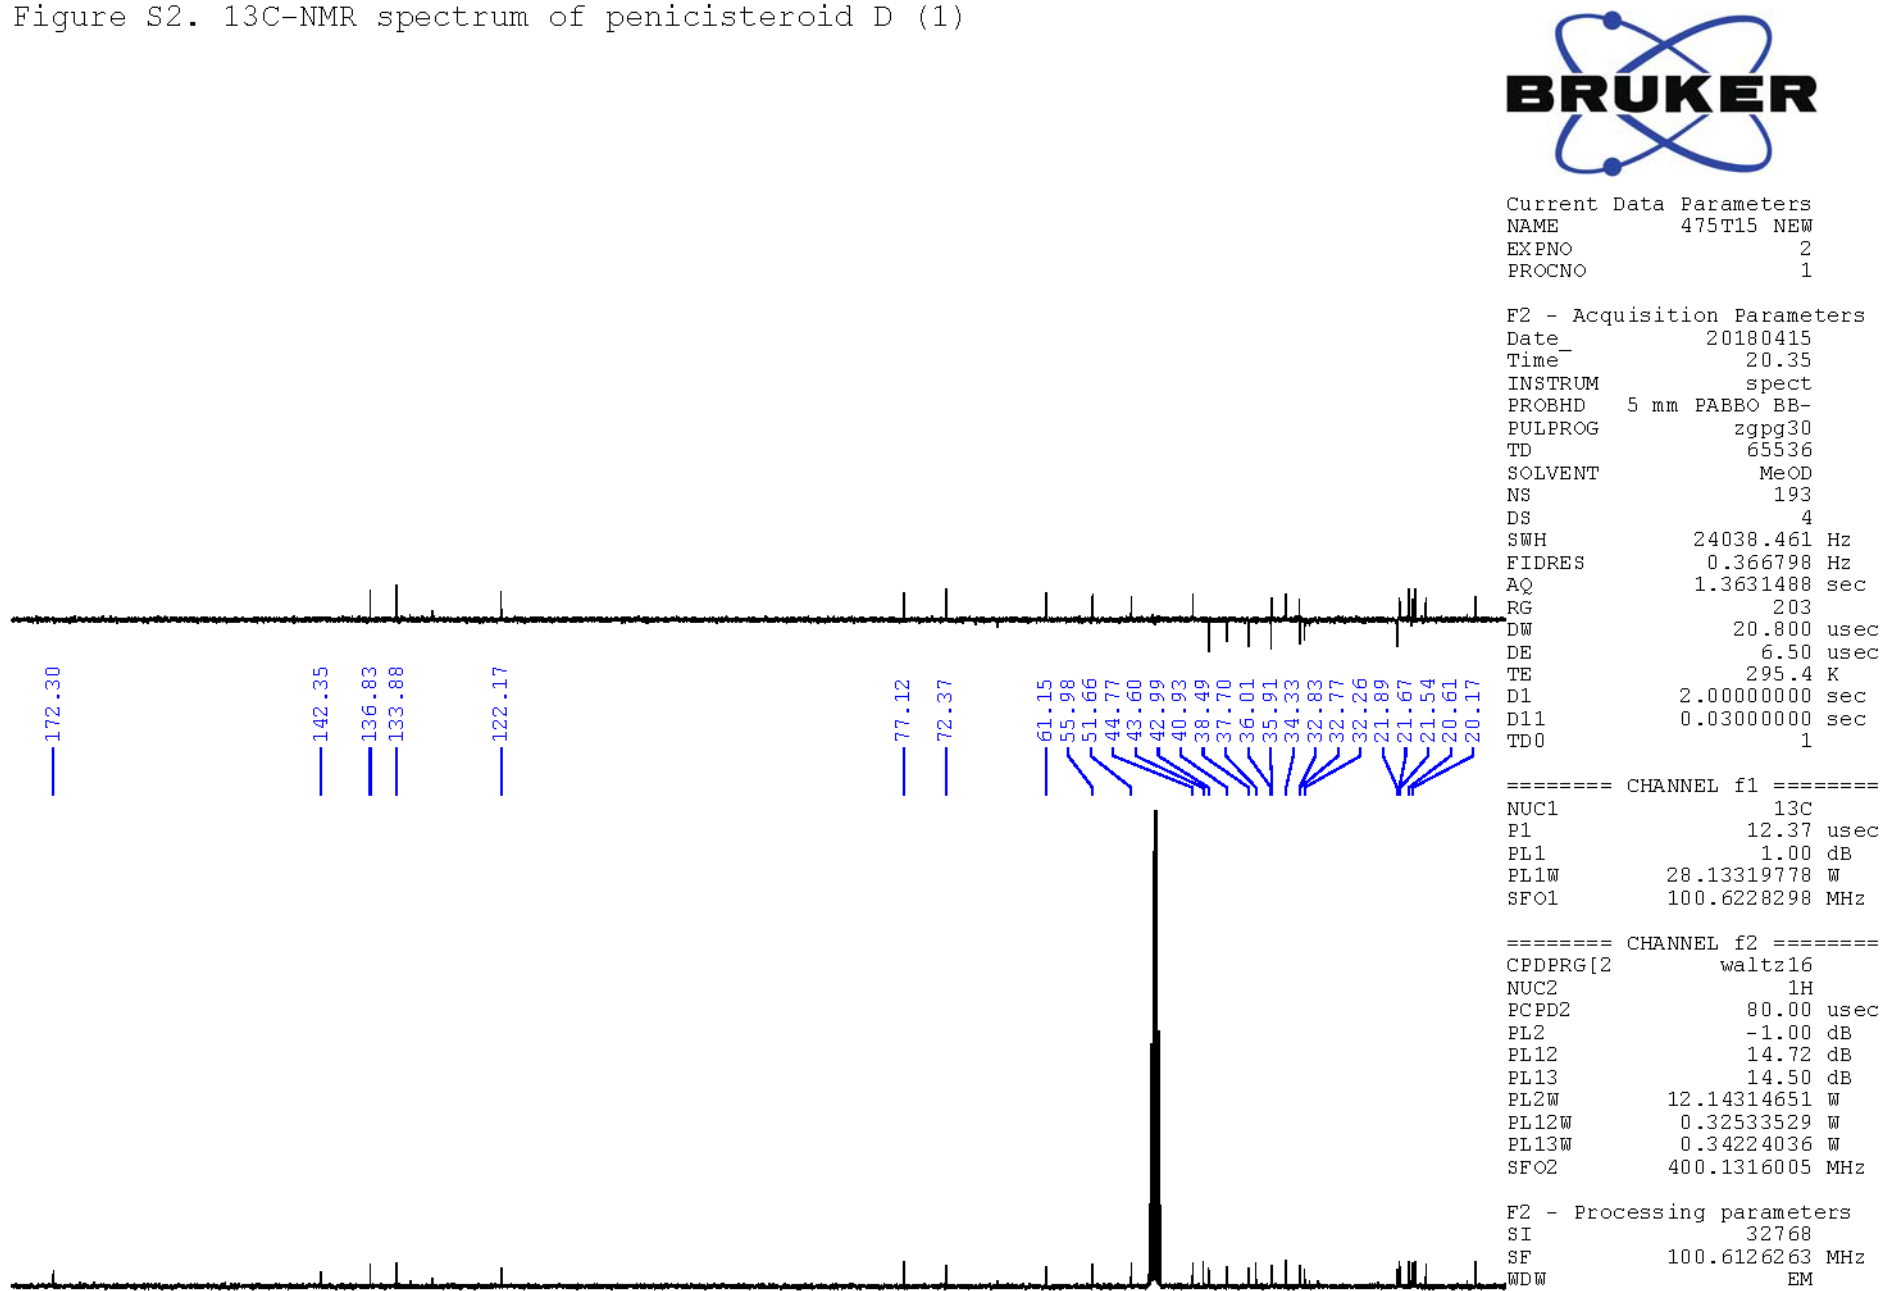

Figure S3. HSQC spectrum of the penicisteroid D (1)

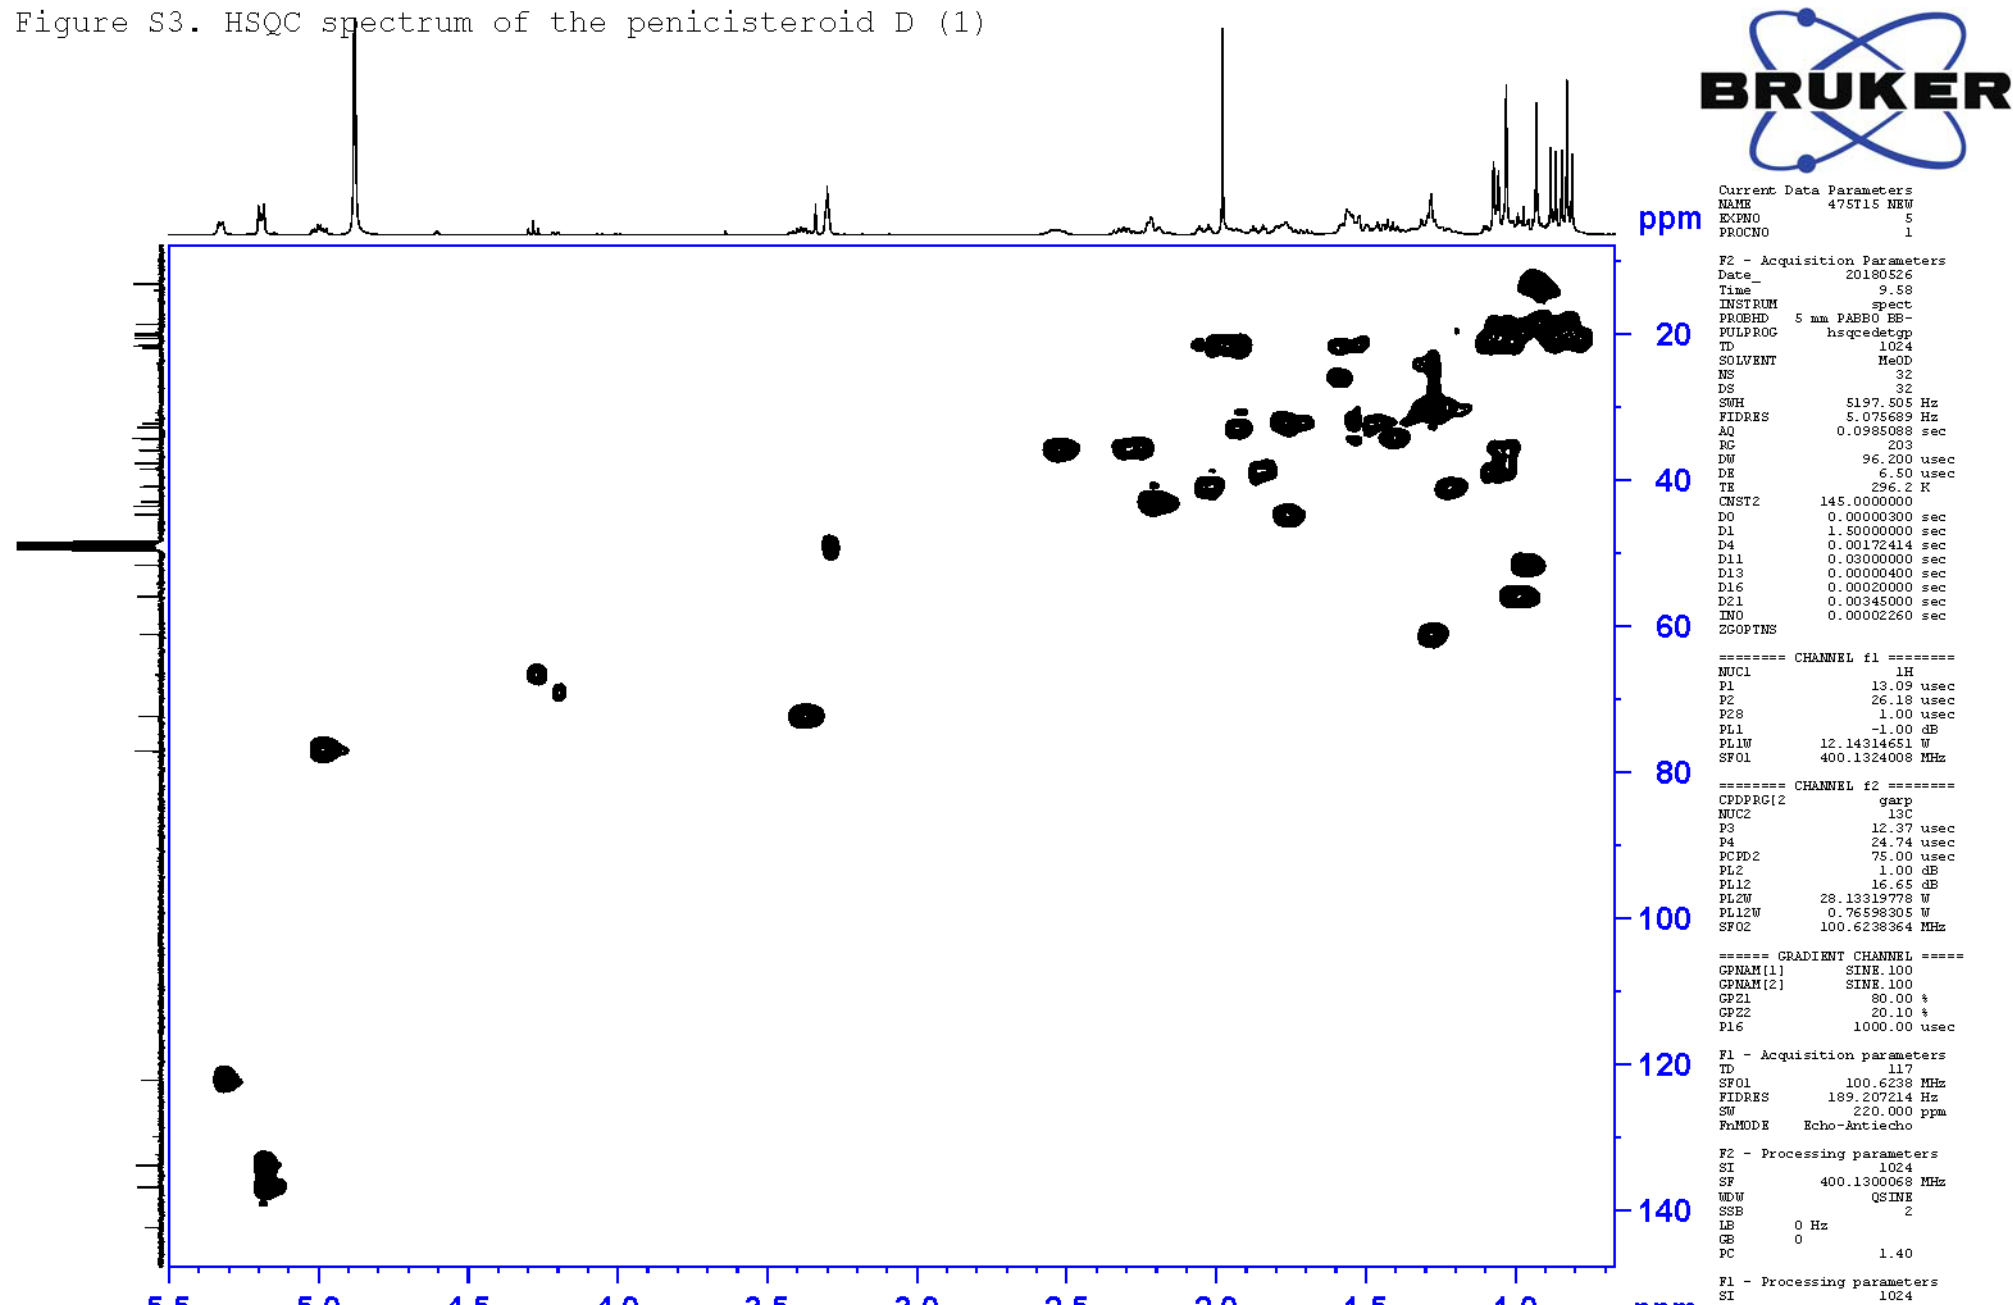

Figure S4. COSY spectrum of penicisteroid D (1)

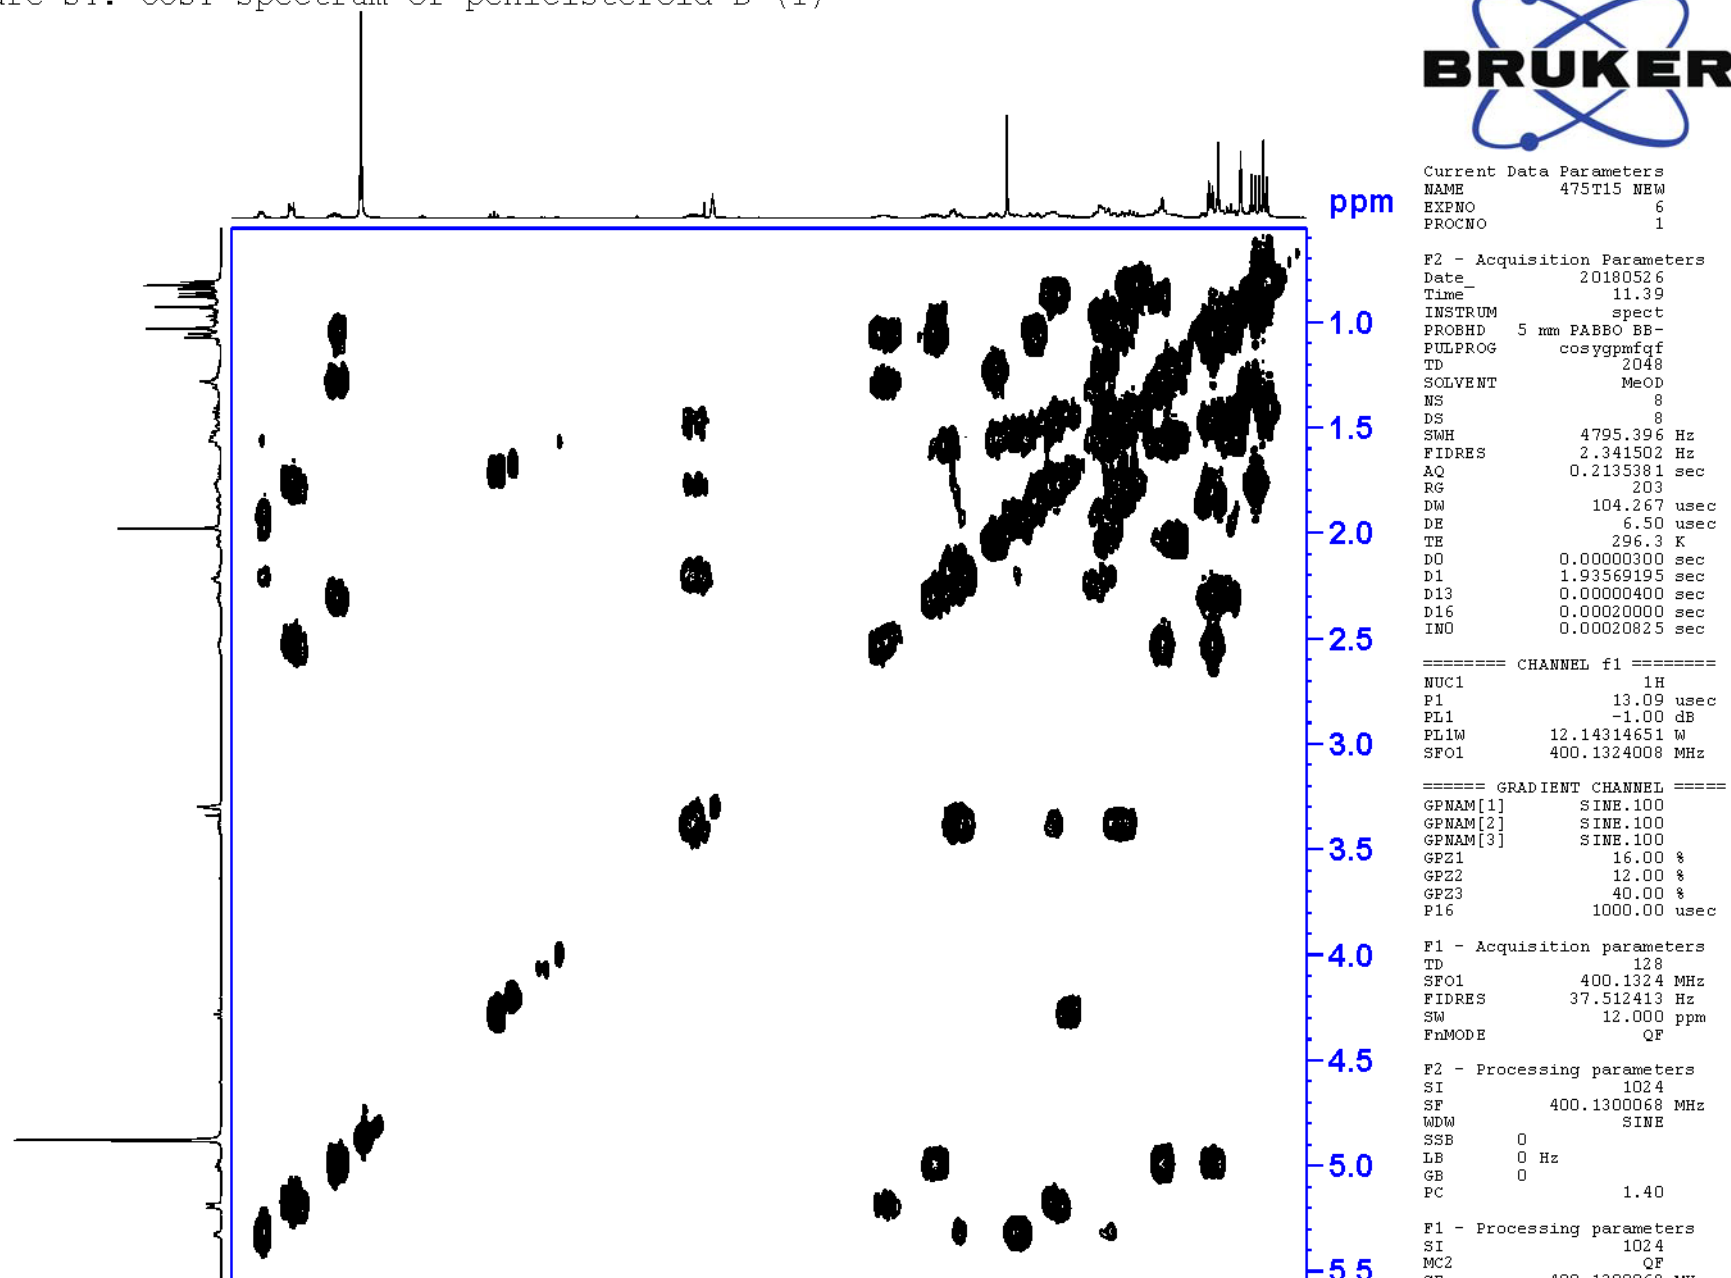

Figure S5. HMBC spectrum of penicisteroid D (1)

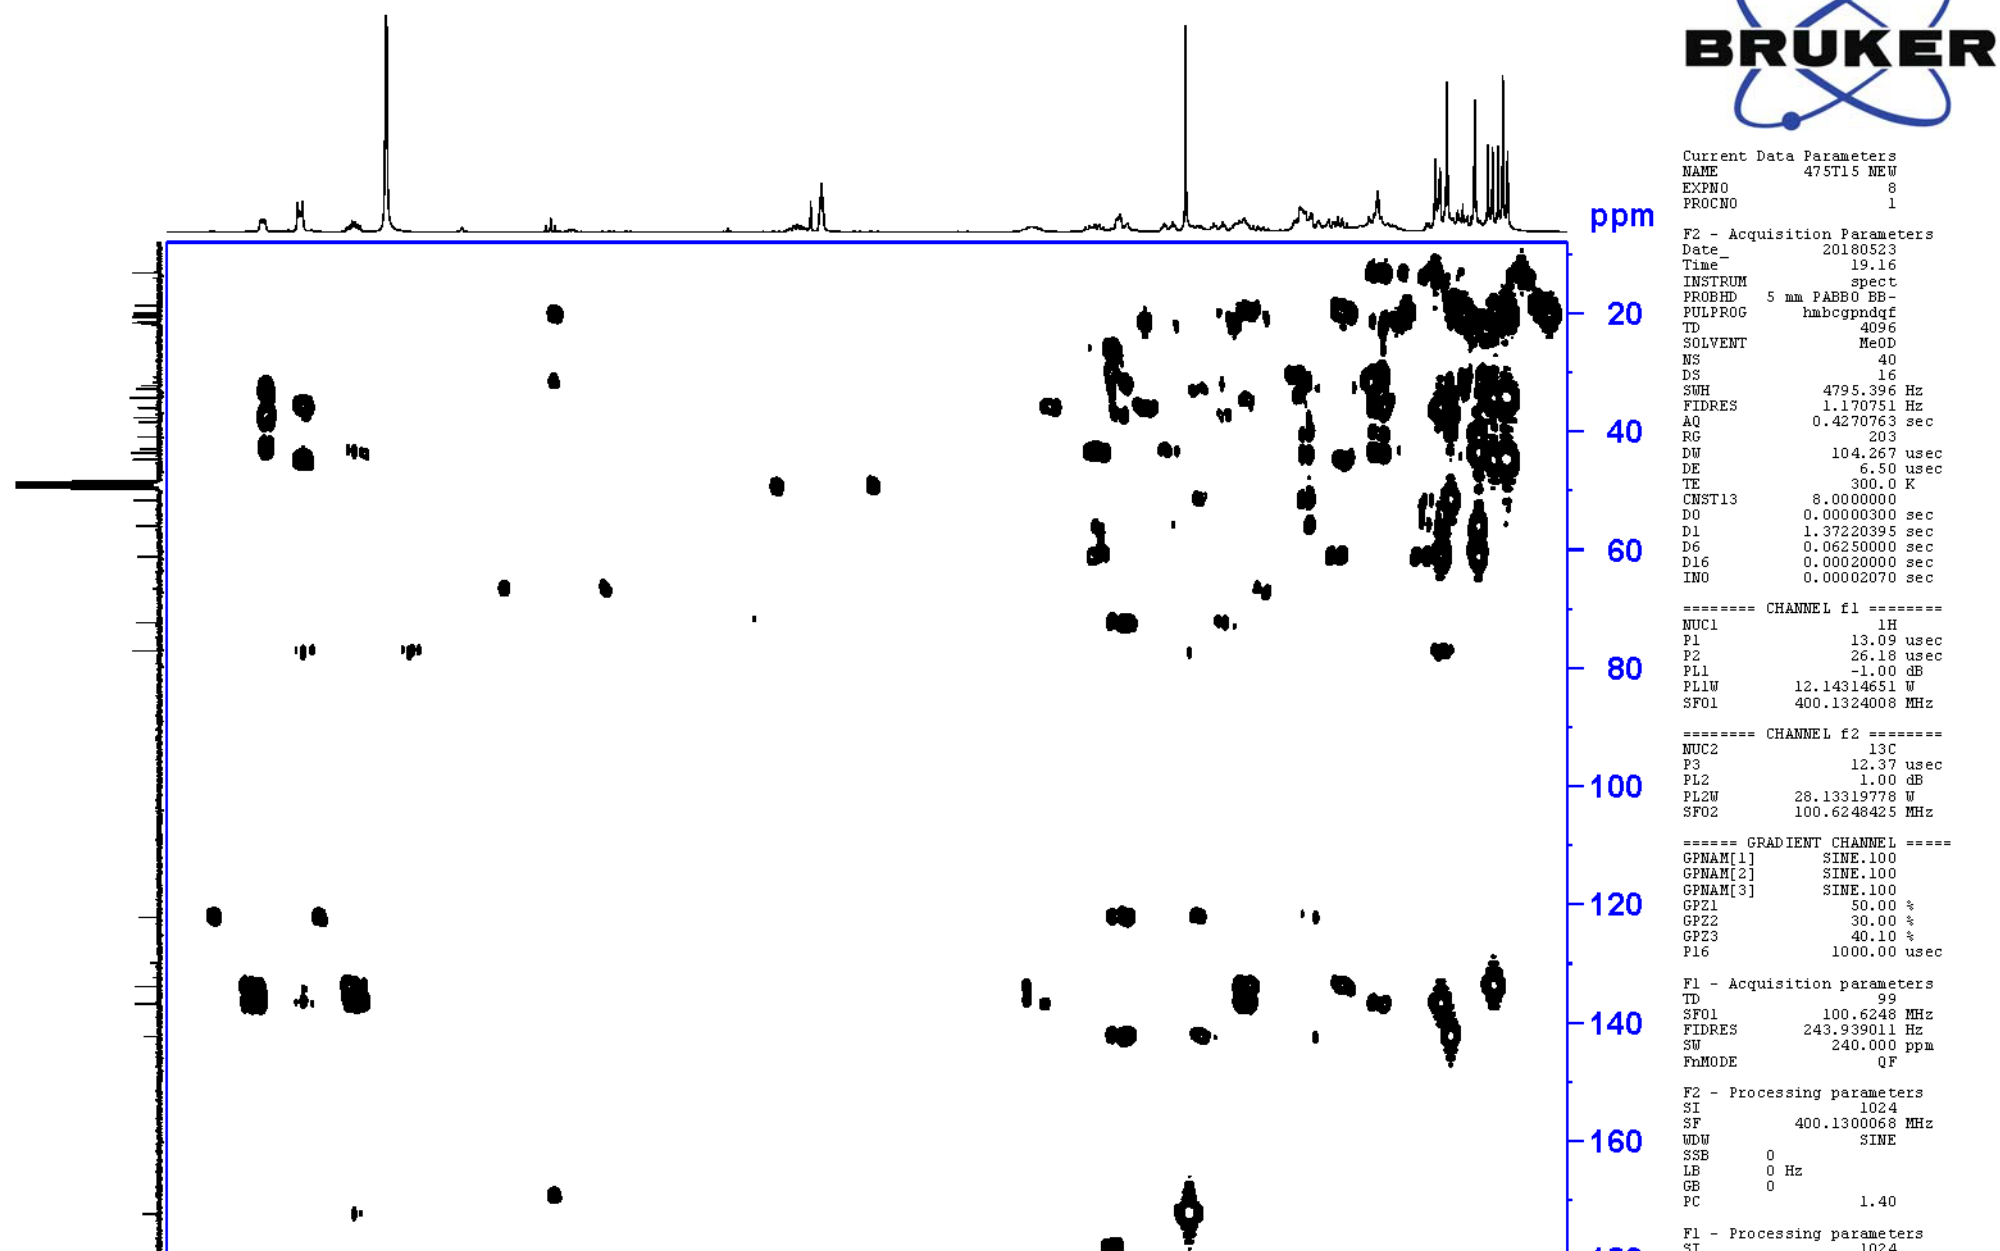

Figure S6. NOESY spectrum of penicisteroid D (1).

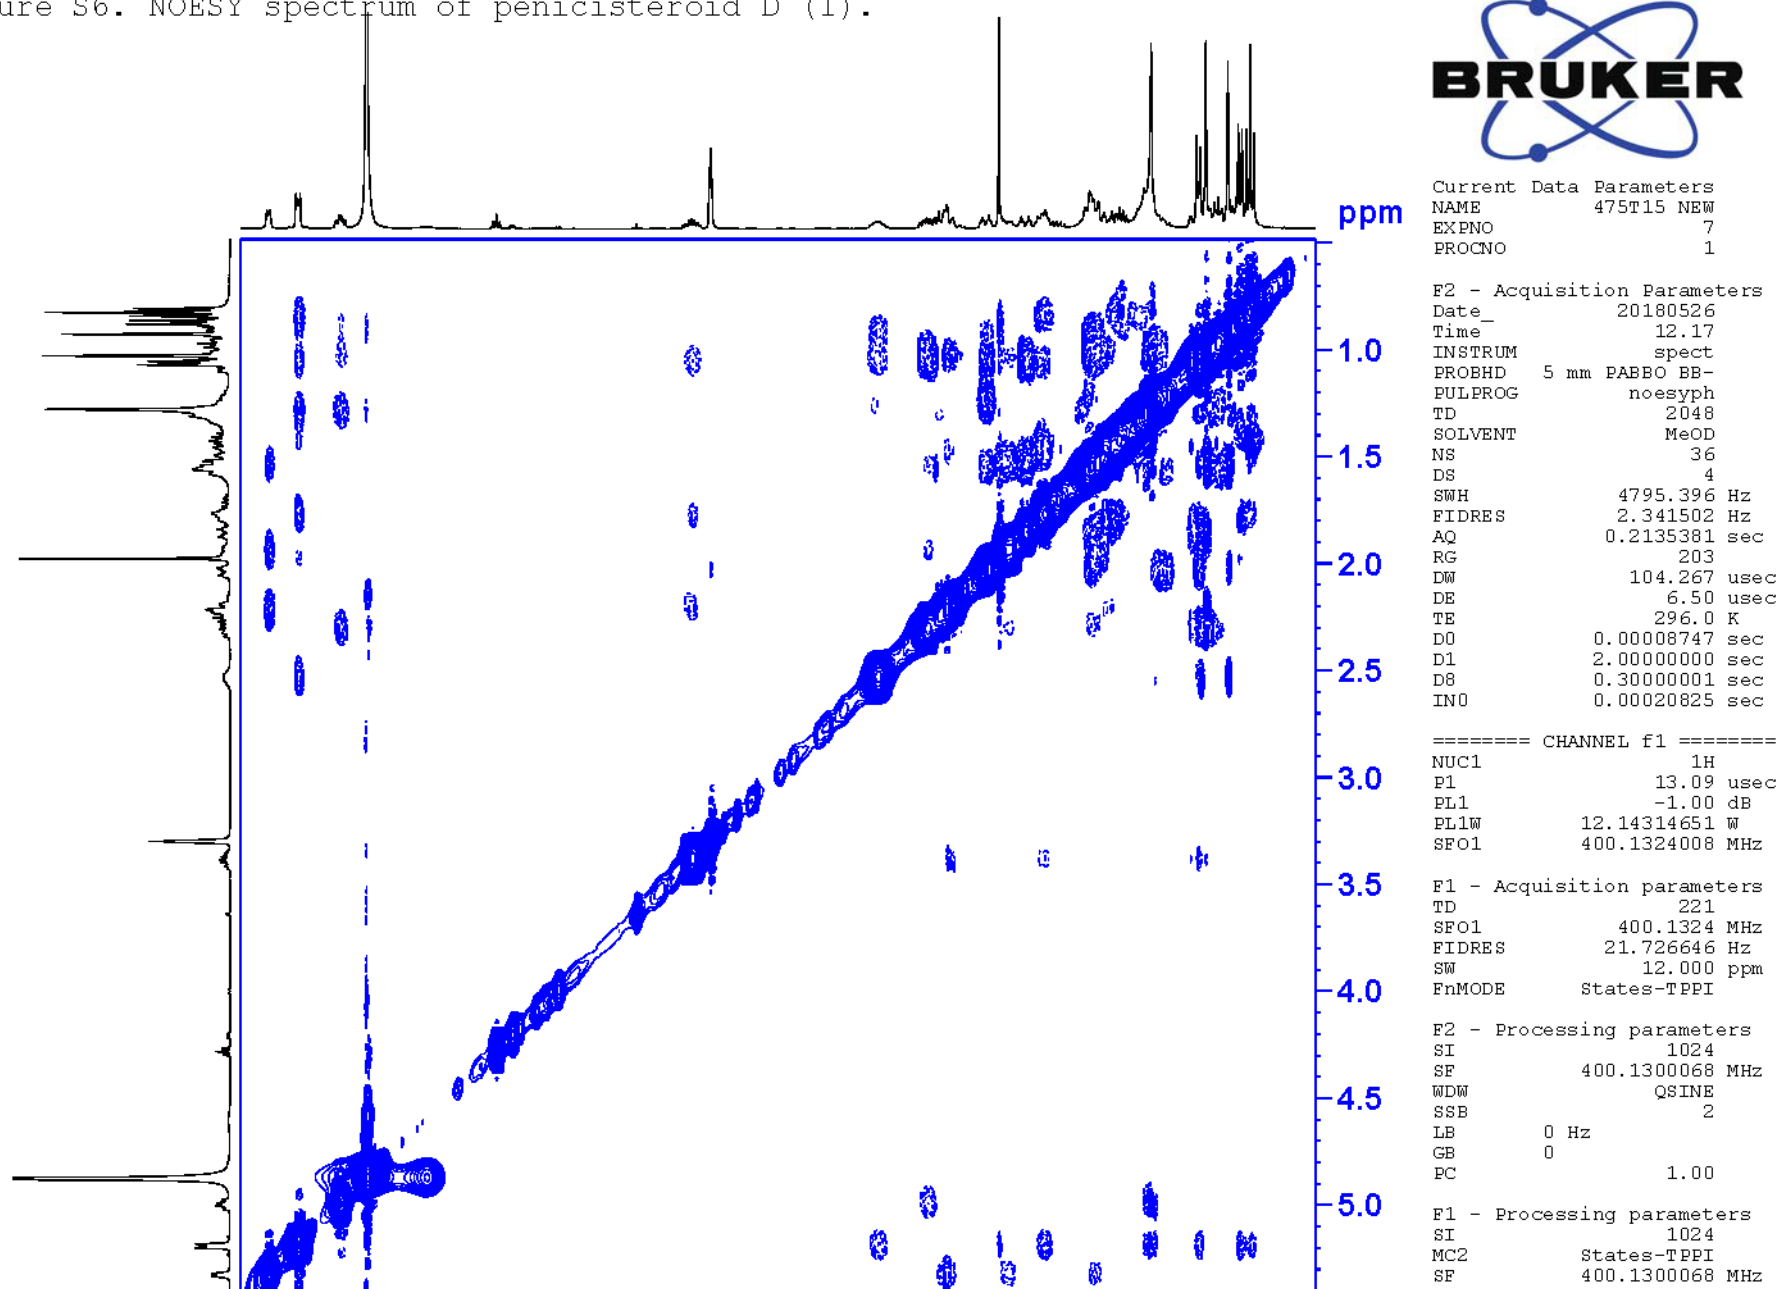

Figure S7. <sup>1</sup>H-NMR spectrum of penicisteroid E (2)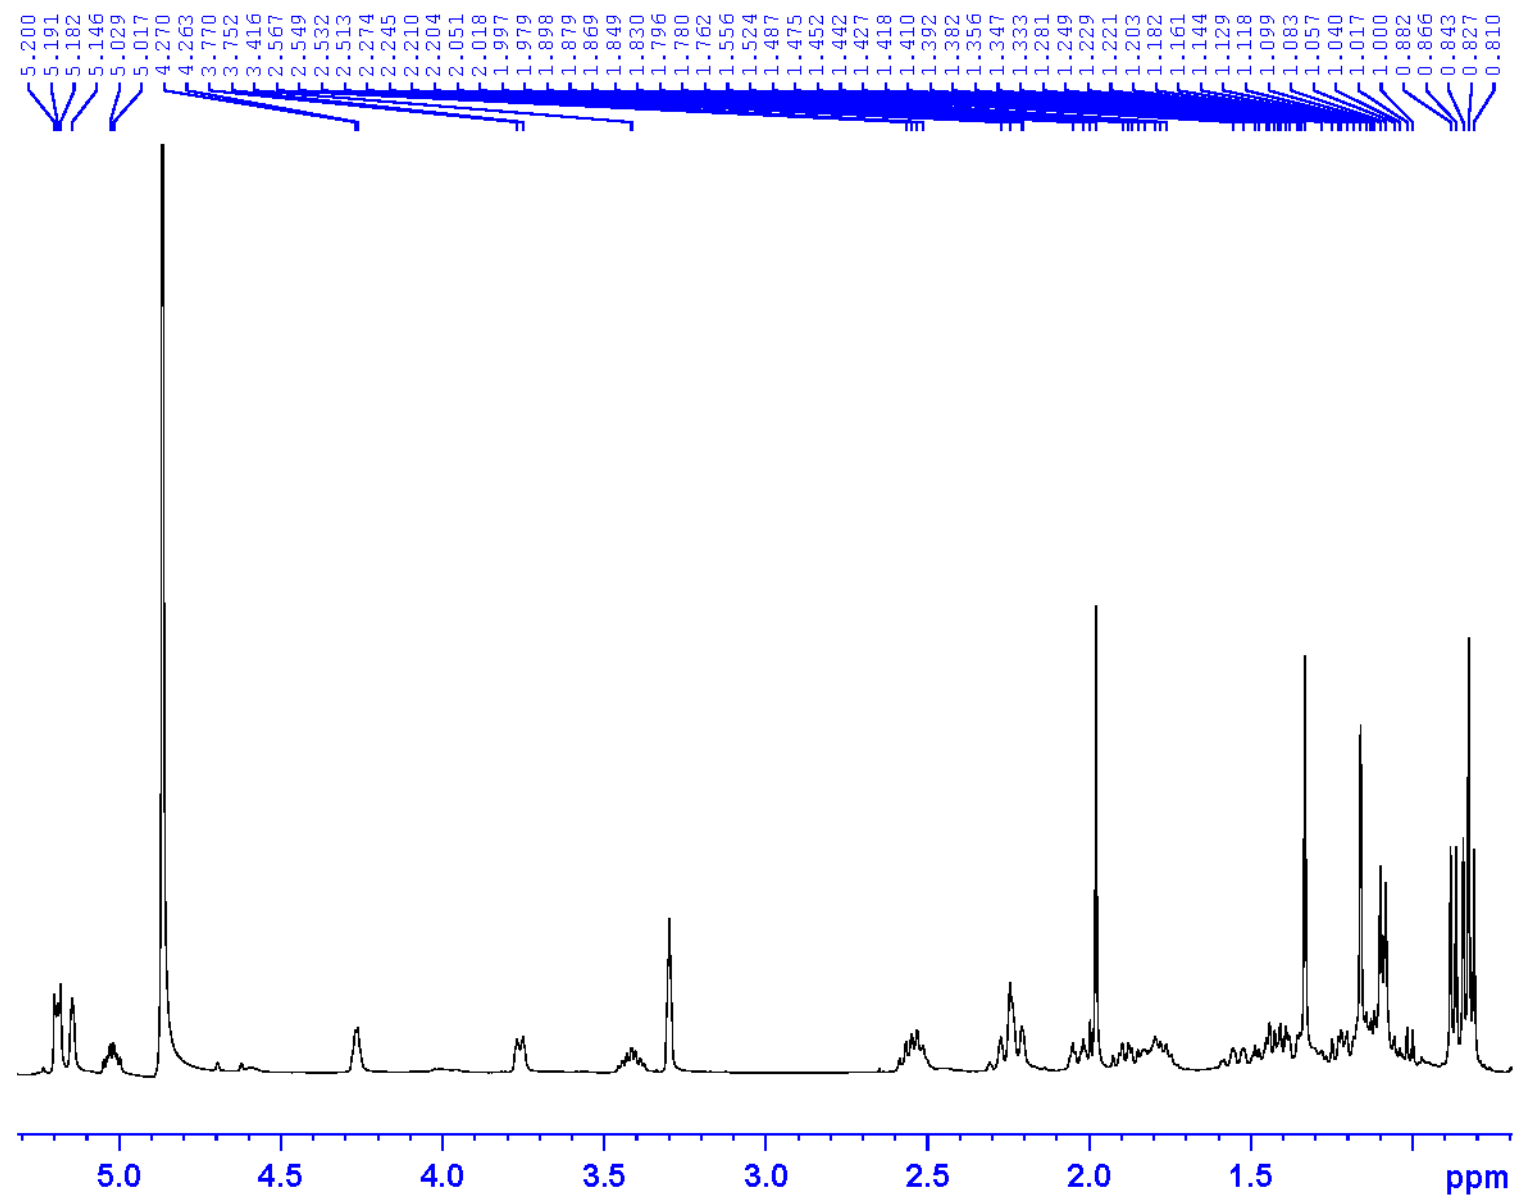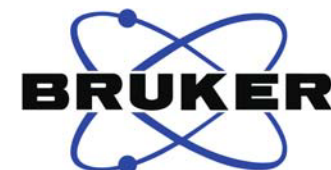

Current Data Parameters  
NAME 475T51 NEW  
EXPNO 1  
PROCNO 1

F2 - Acquisition Parameters  
Date\_ 20180509  
Time\_ 17.34  
INSTRUM spect  
PROBHD 5 mm PABBO BB-  
PULPROG zg30  
TD 65536  
SOLVENT MeOD  
NS 35  
DS 2  
SWH 8223.685 Hz  
FIDRES 0.125483 Hz  
AQ 3.9845889 sec  
RG 128  
DW 60.800 usec  
DE 6.50 usec  
TE 296.5 K  
D1 1.00000000 sec  
TD0 1

===== CHANNEL f1 =====  
NUC1 1H  
P1 13.09 usec  
PL1 -1.00 dB  
PL1W 12.14314651 W  
SFO1 400.1324710 MHz

F2 - Processing parameters  
SI 32768  
SF 400.1300068 MHz  
WDW EM  
SSB 0  
LB 0.30 Hz  
GB 0  
PC 1.00



Figure S8. <sup>13</sup>C-NMR spectrum of penicisteroid E (2)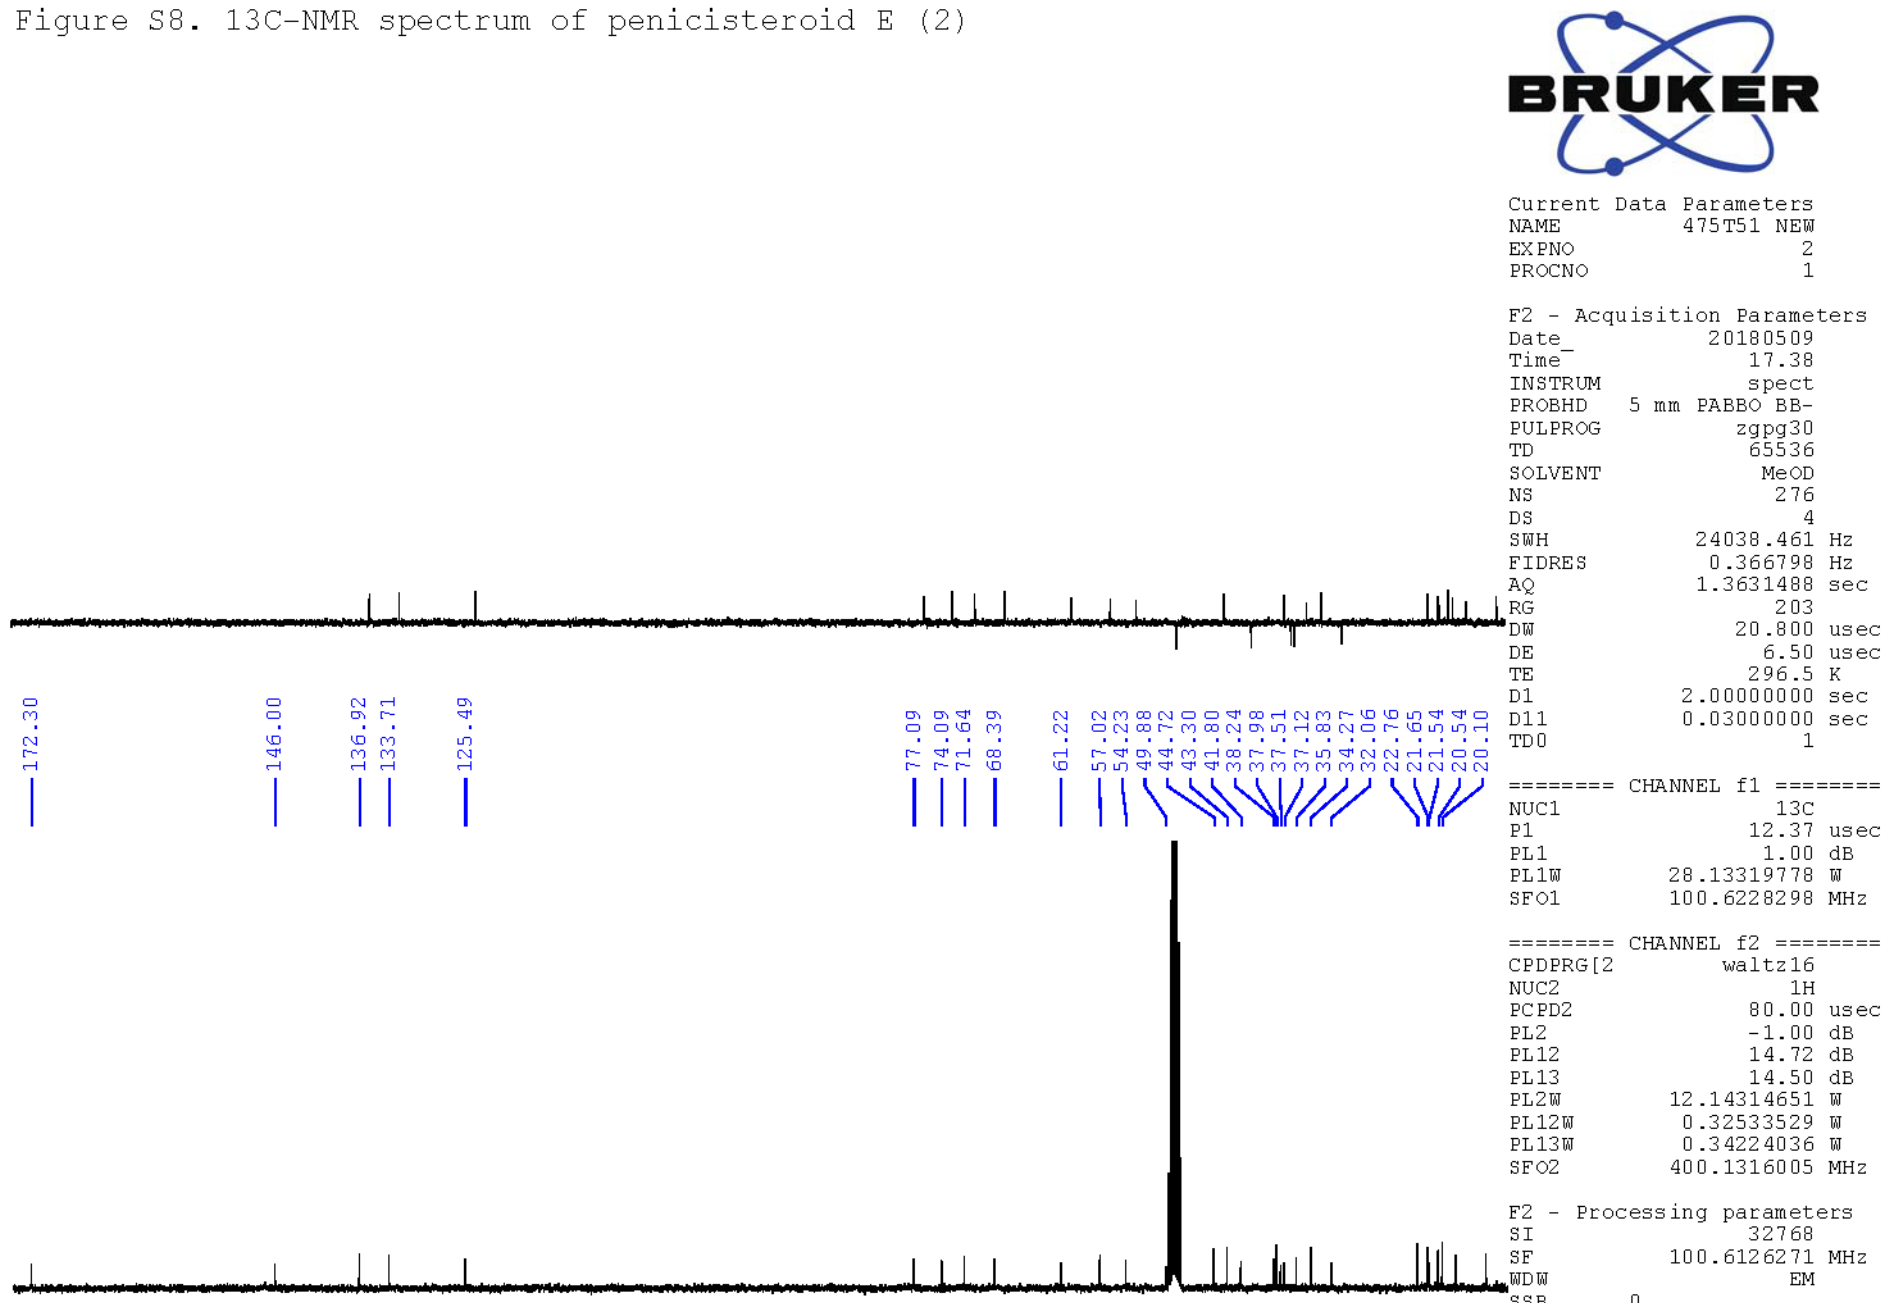

Figure S9. HSQC spectrum of penicisteroid E (2)

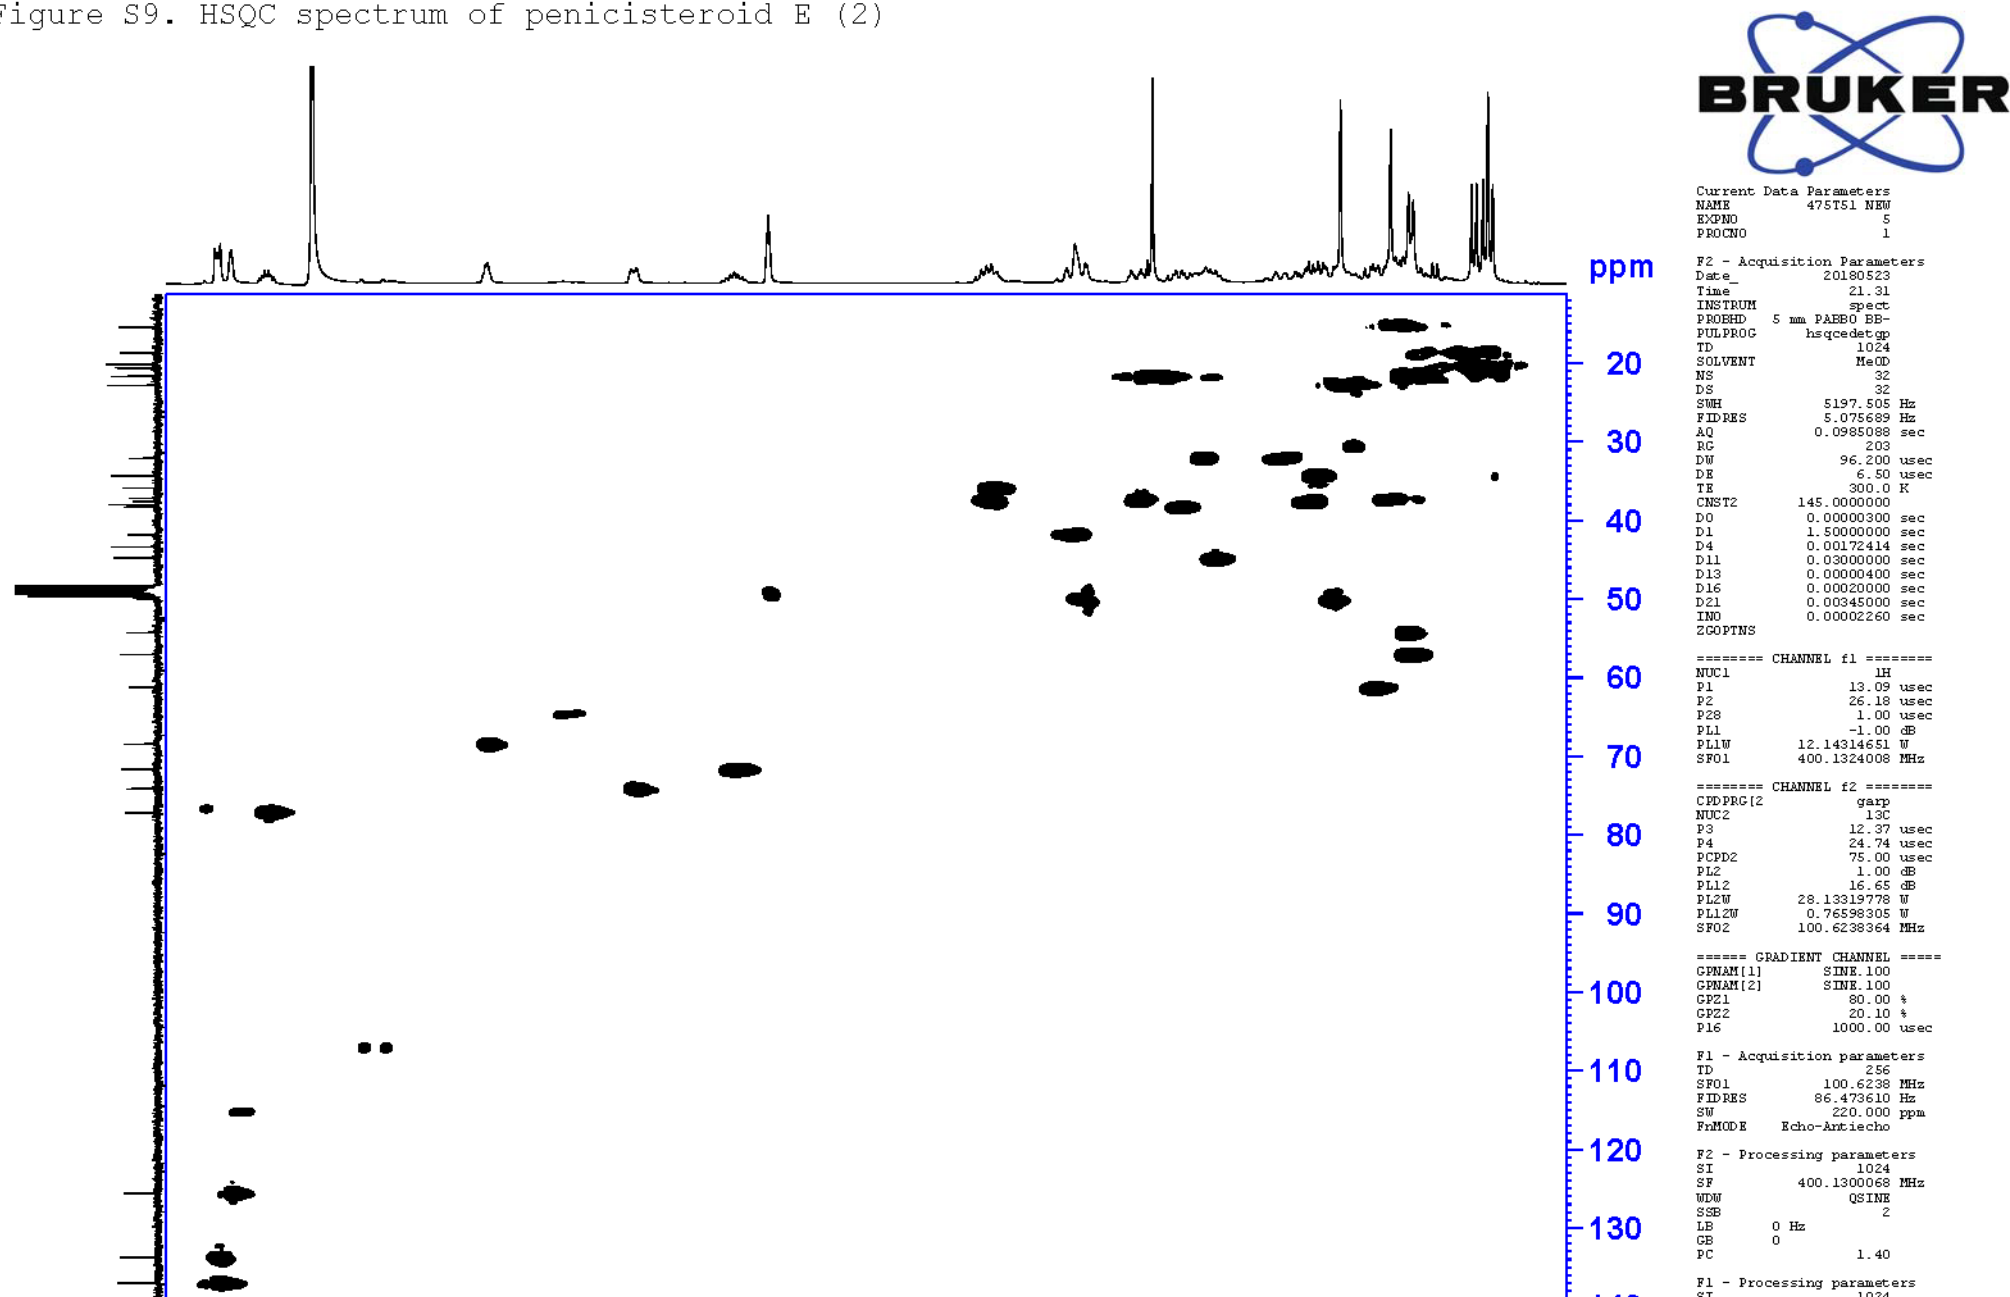

Figure S10. COSY spectrum of penicisteroid E (2)

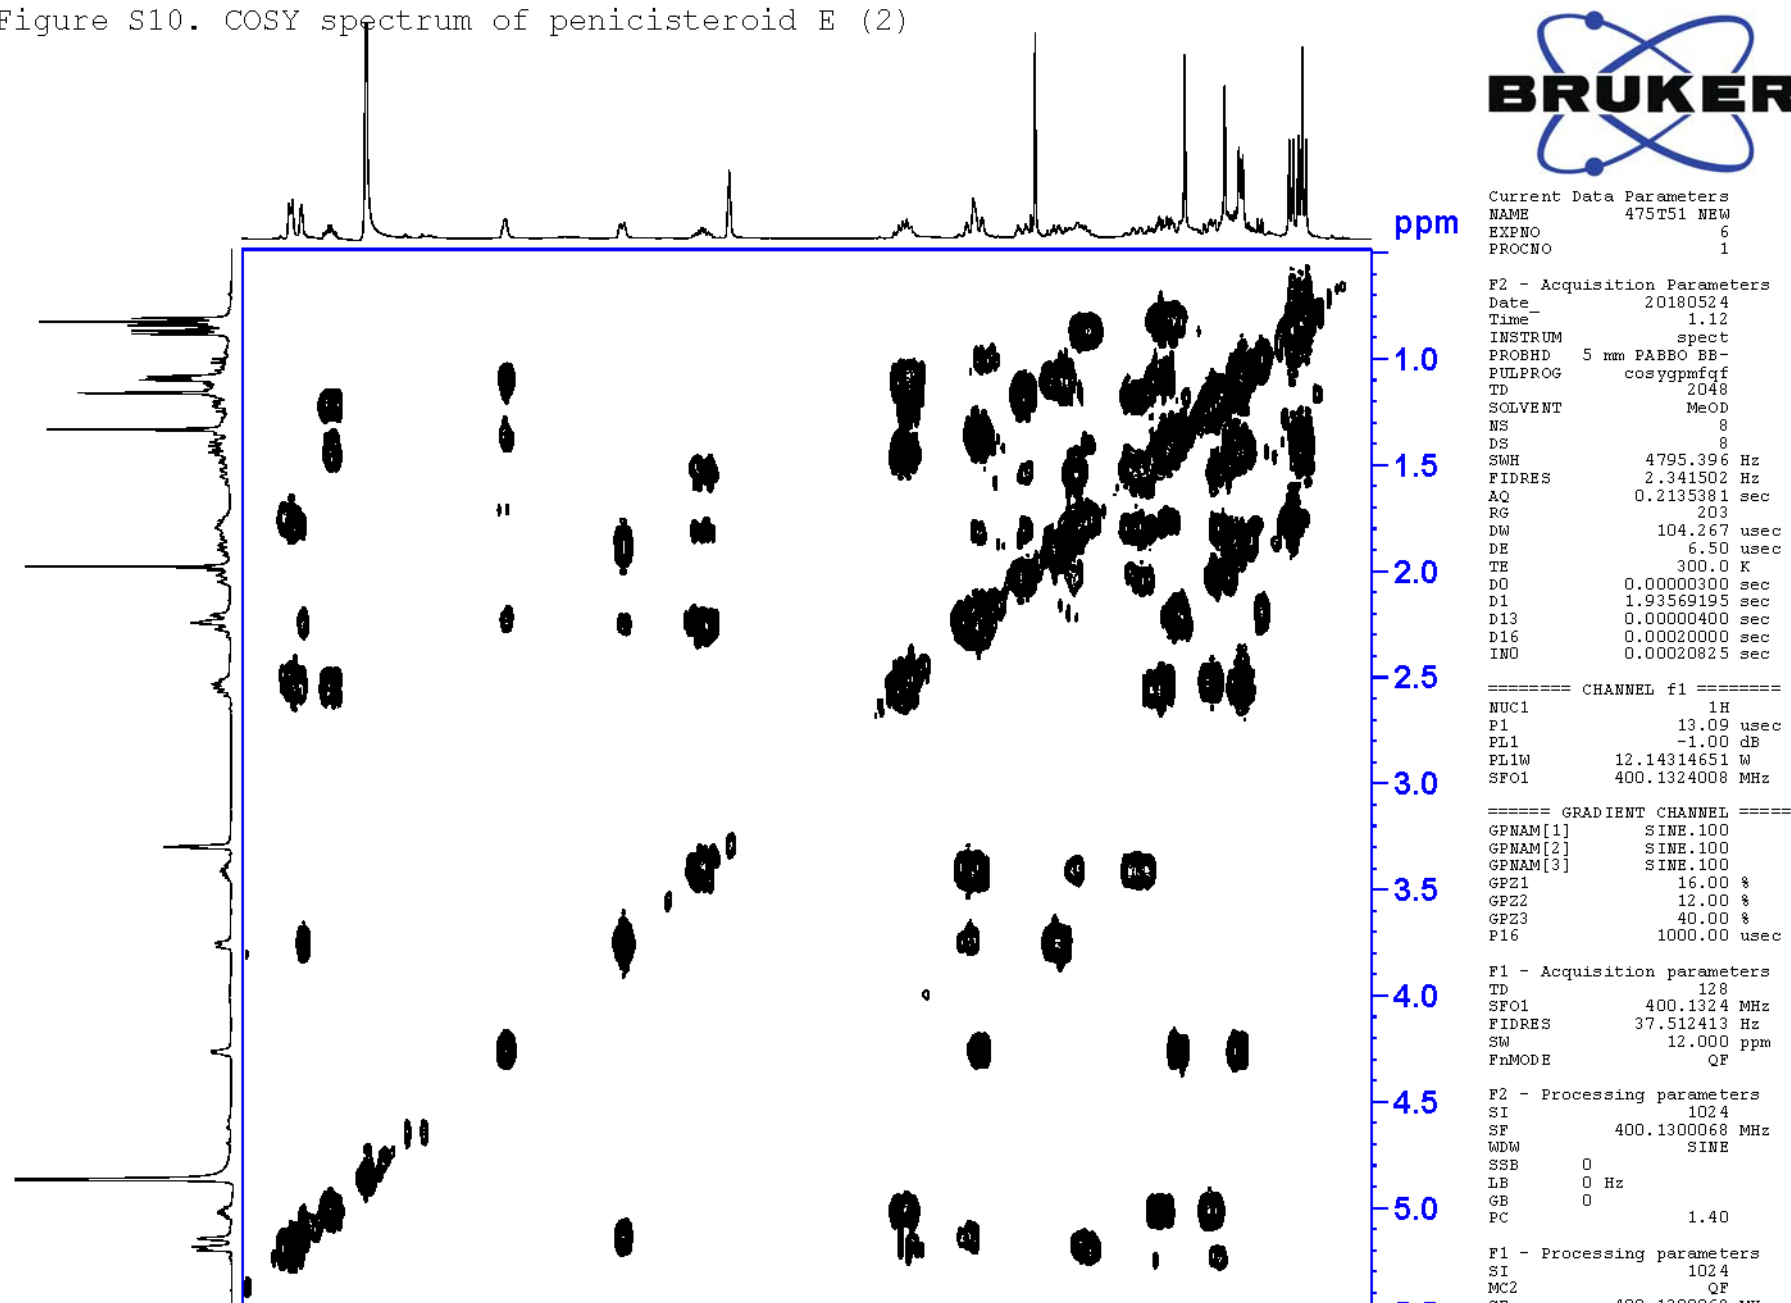

Figure S11. HMBC spectrum of penicisteroid E (2)

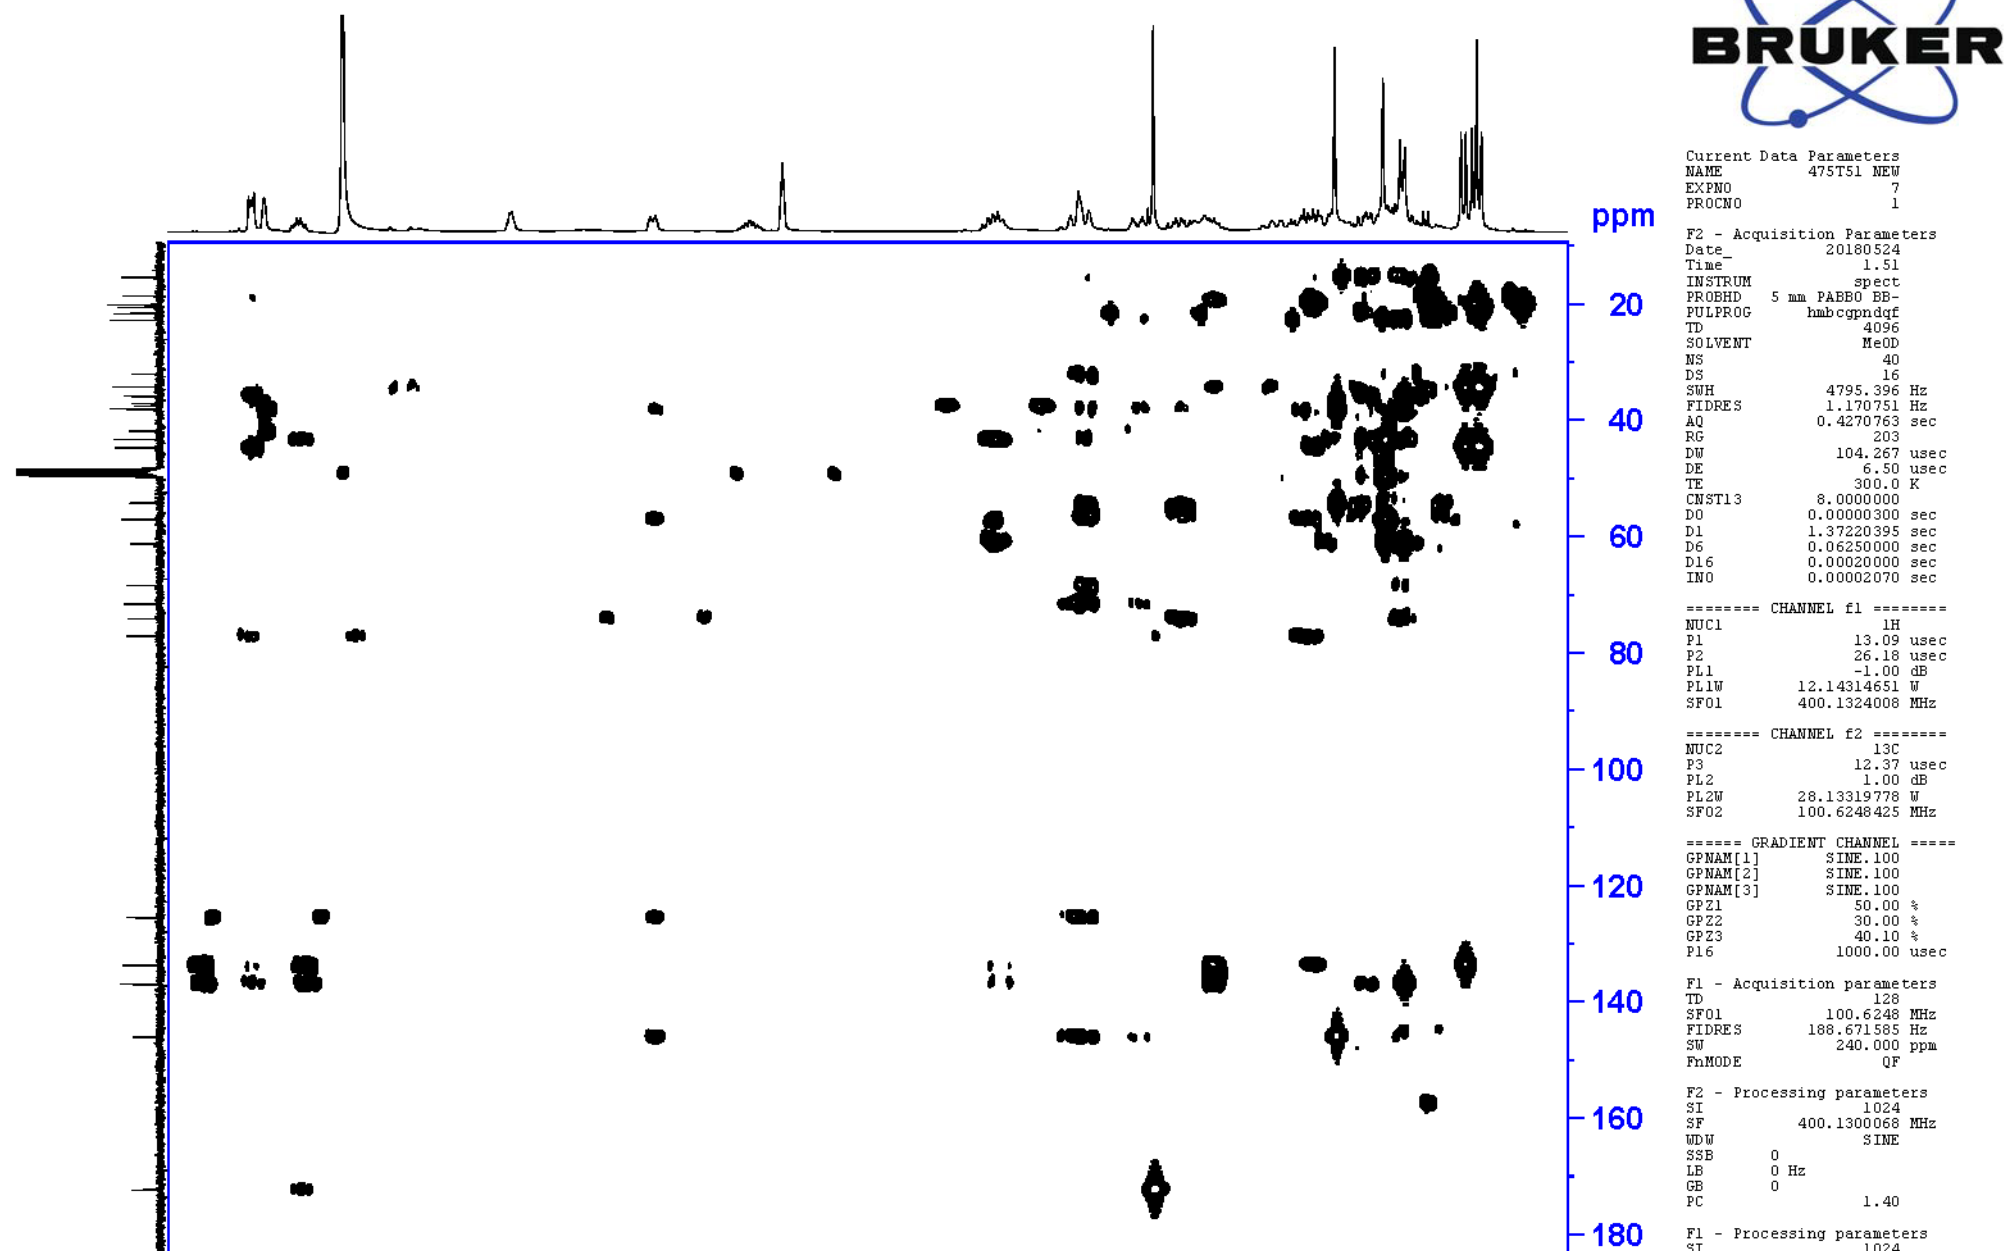

Figure S12. NOESY spectrum of penicisteroid E (2).

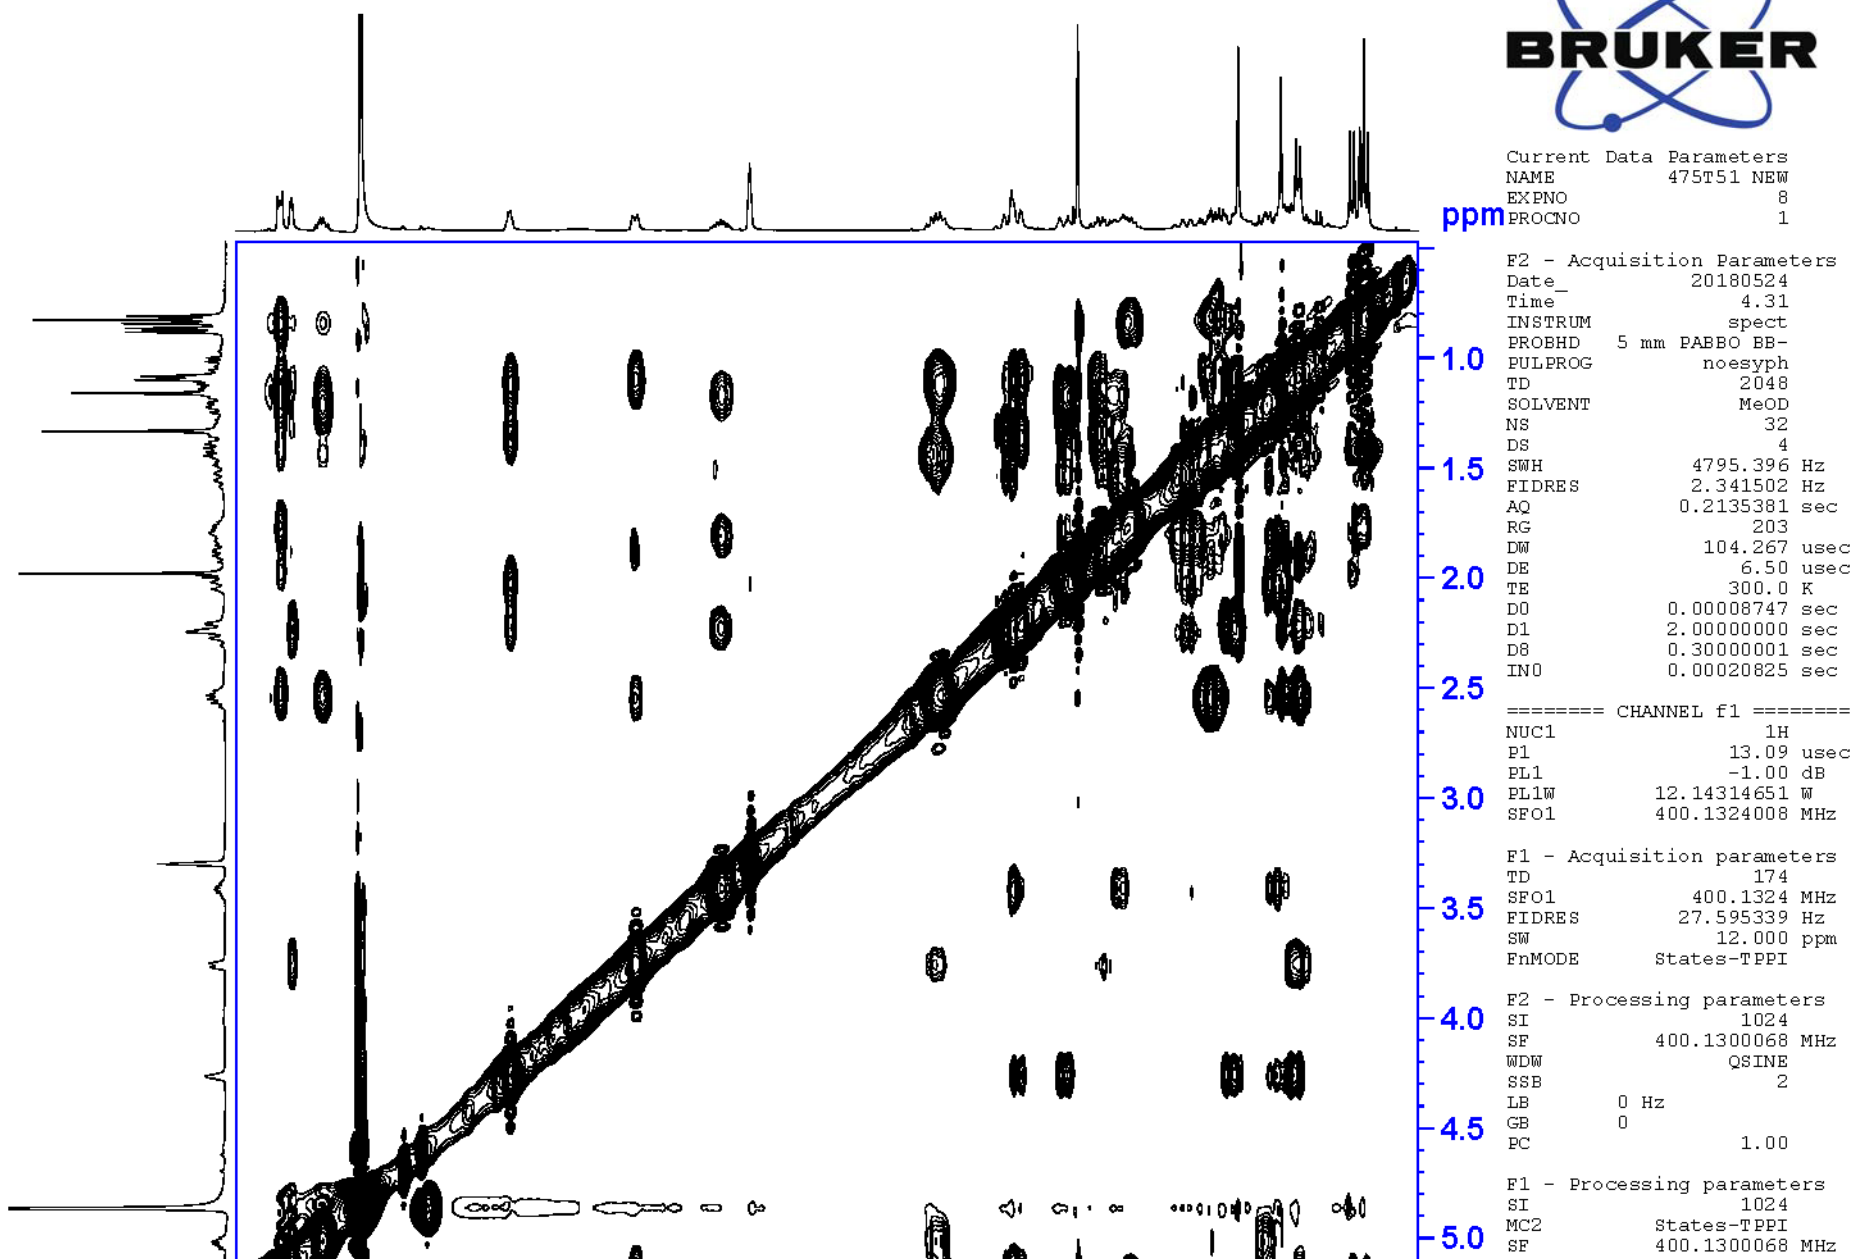

Figure S13. <sup>1</sup>H-NMR spectrum of penicisteroid F (3)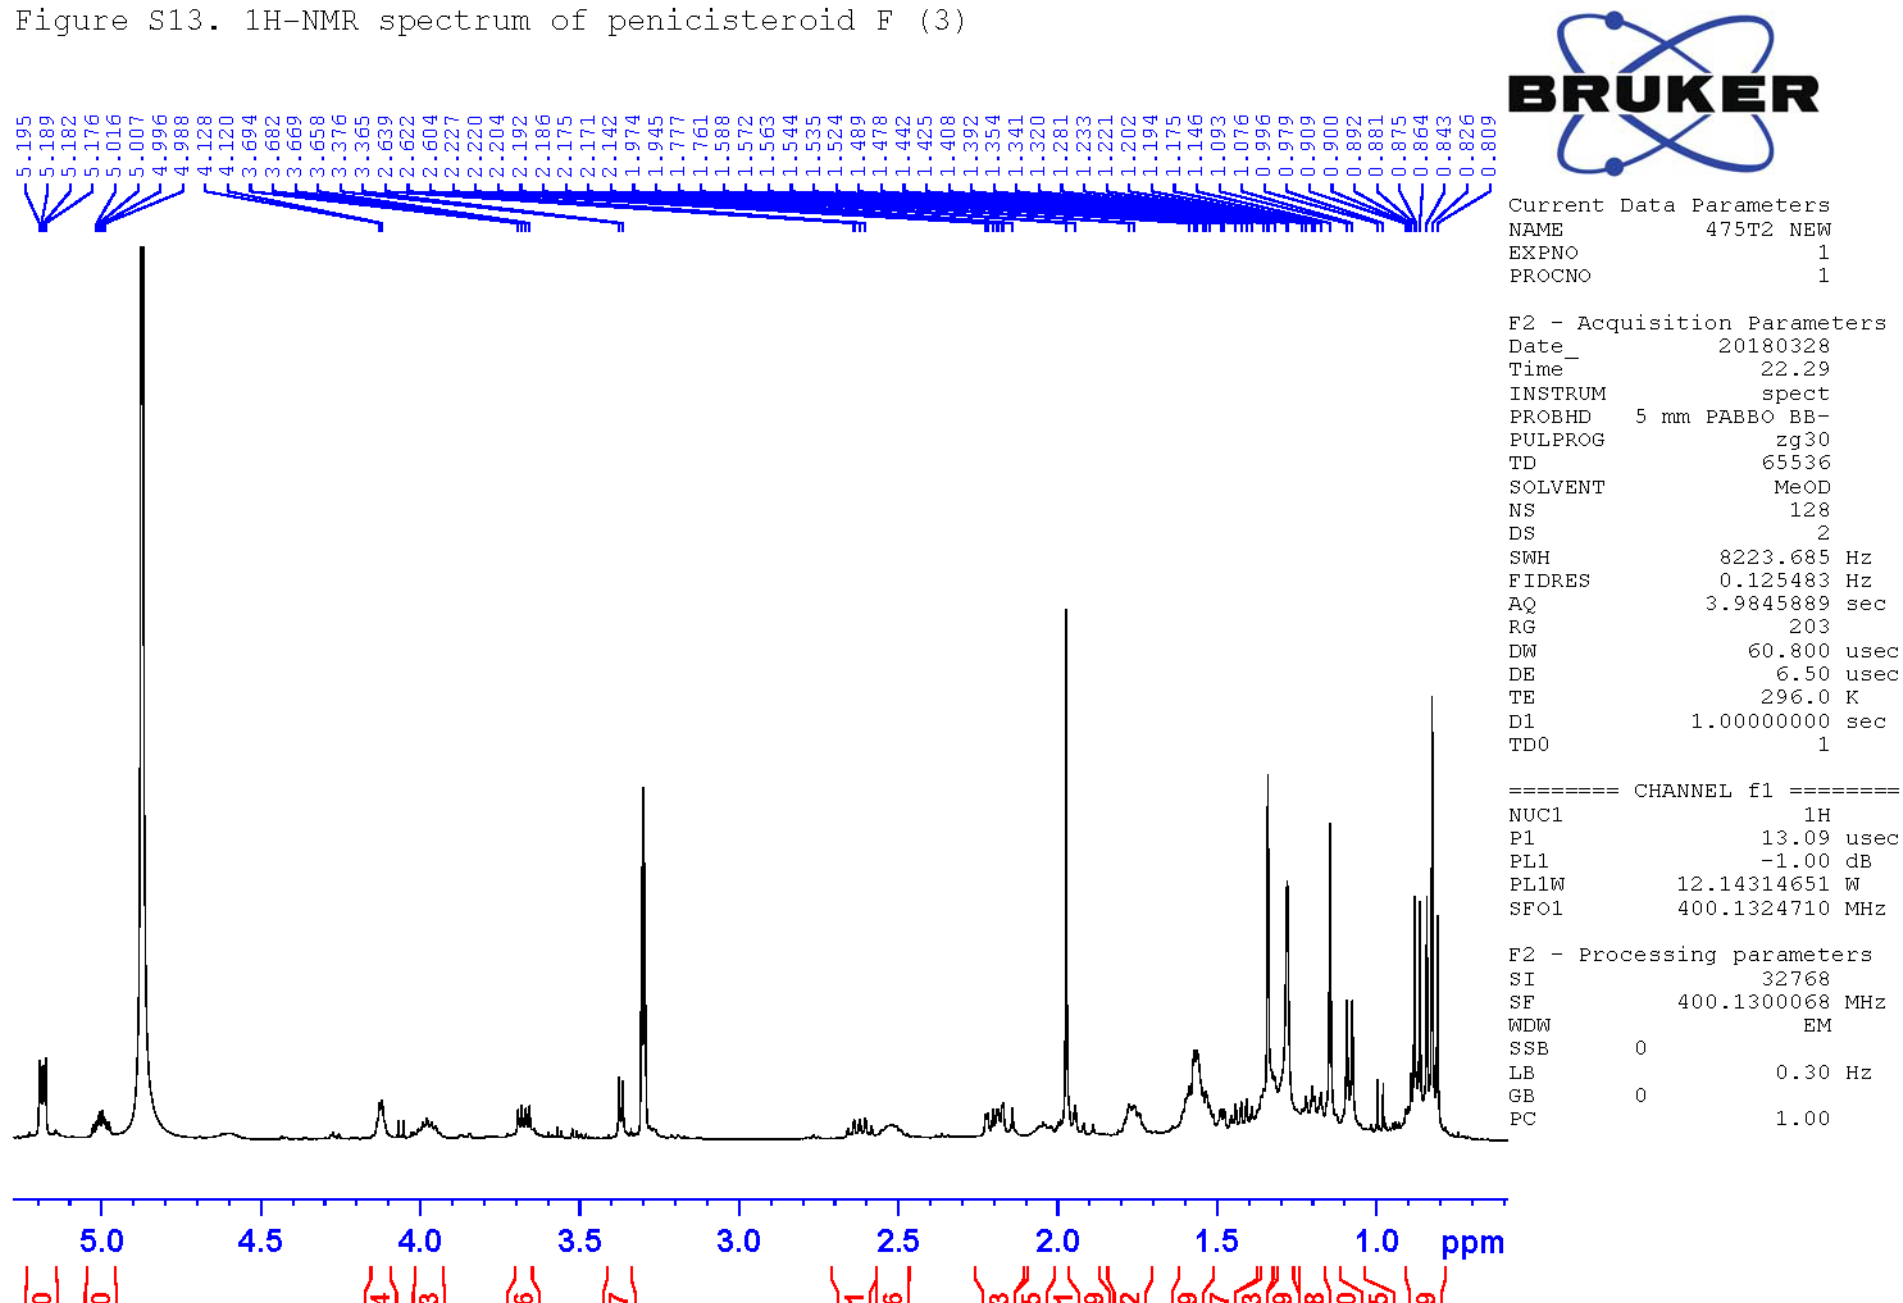

Figure S14.  $^{13}\text{C}$ -NMR spectrum of penicisteroid F (3)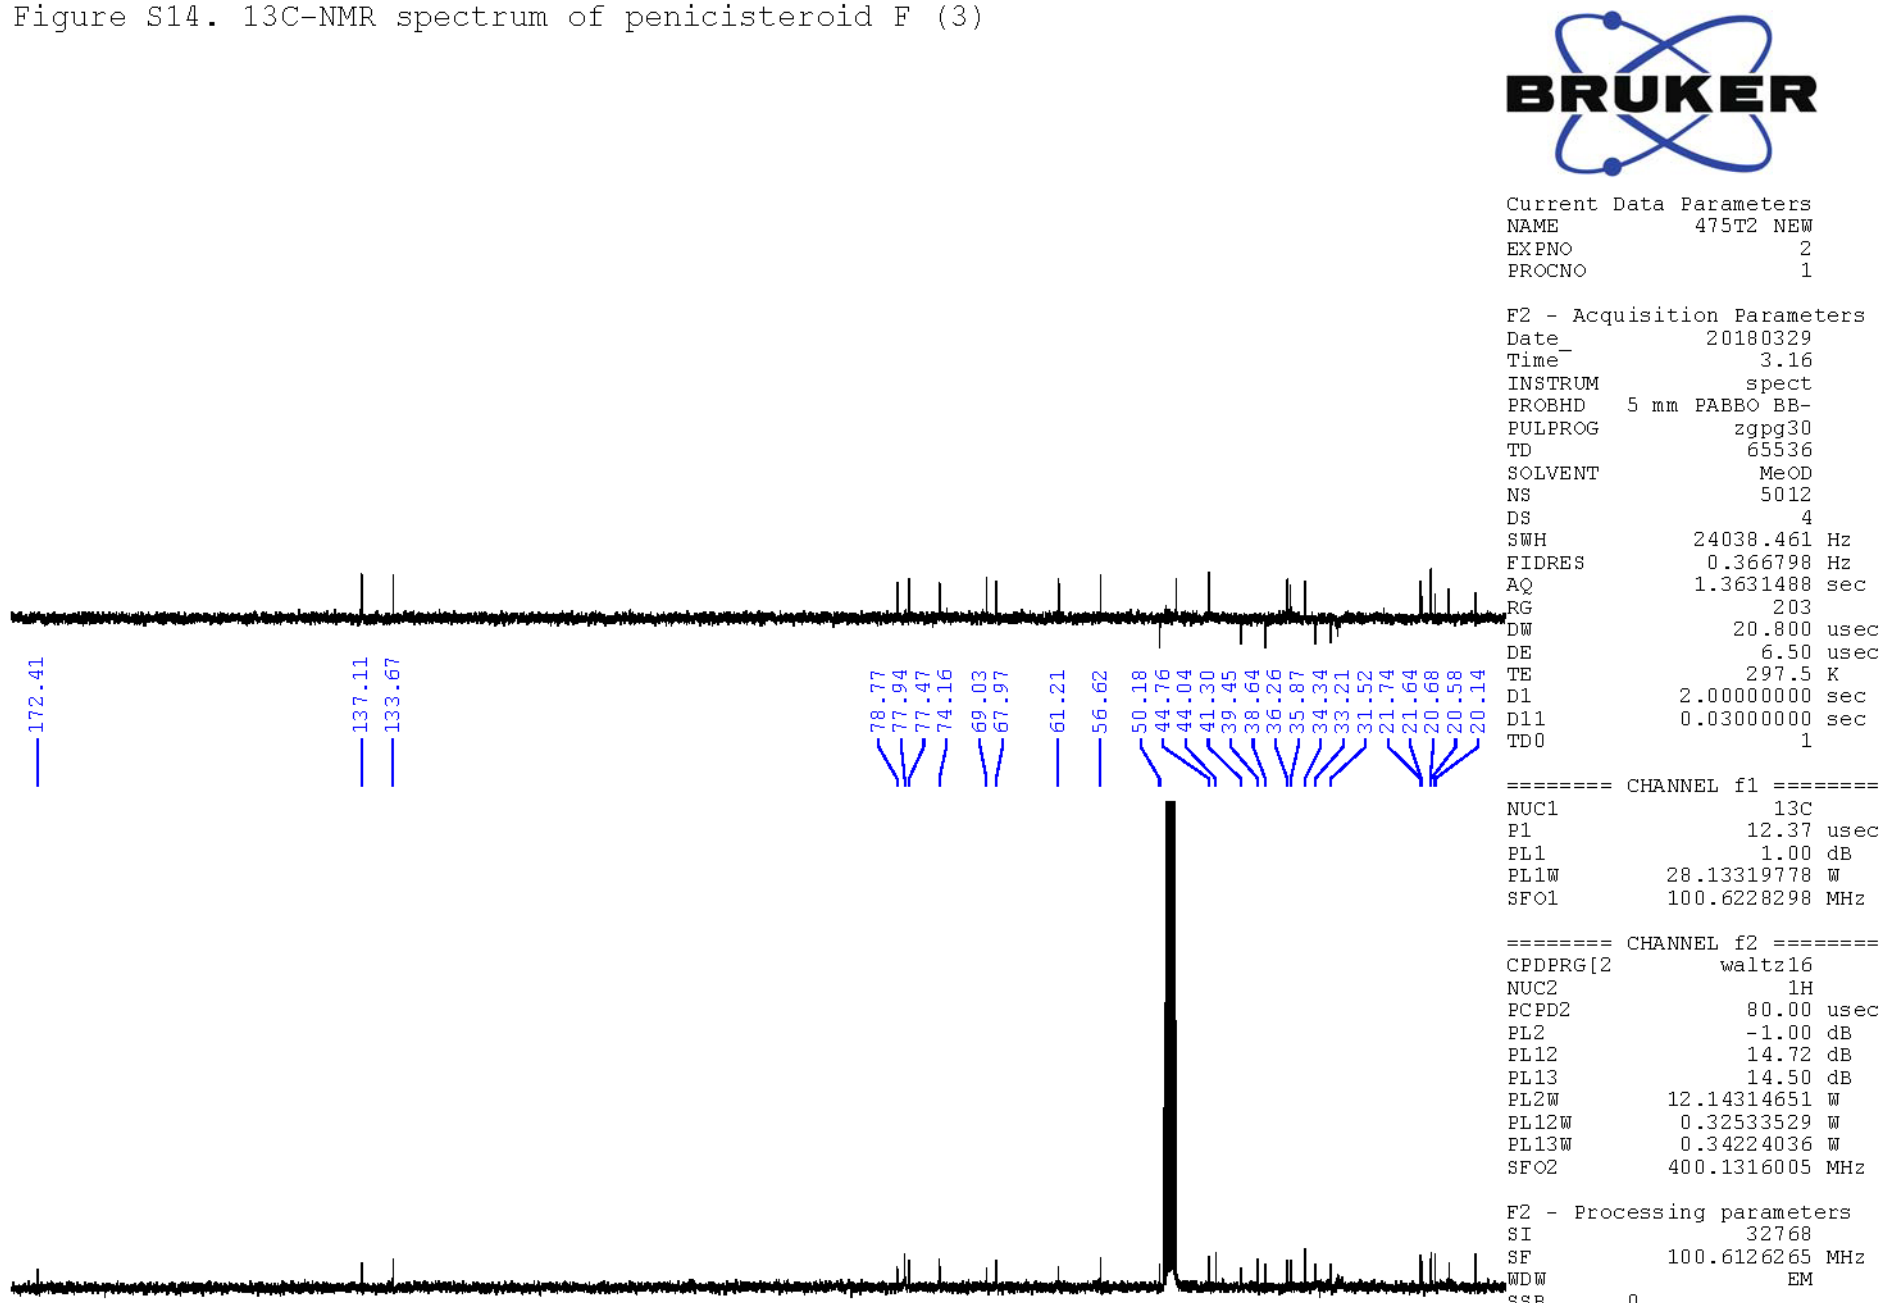

Figure S15. HSQC spectrum of penicisteroid F (3)

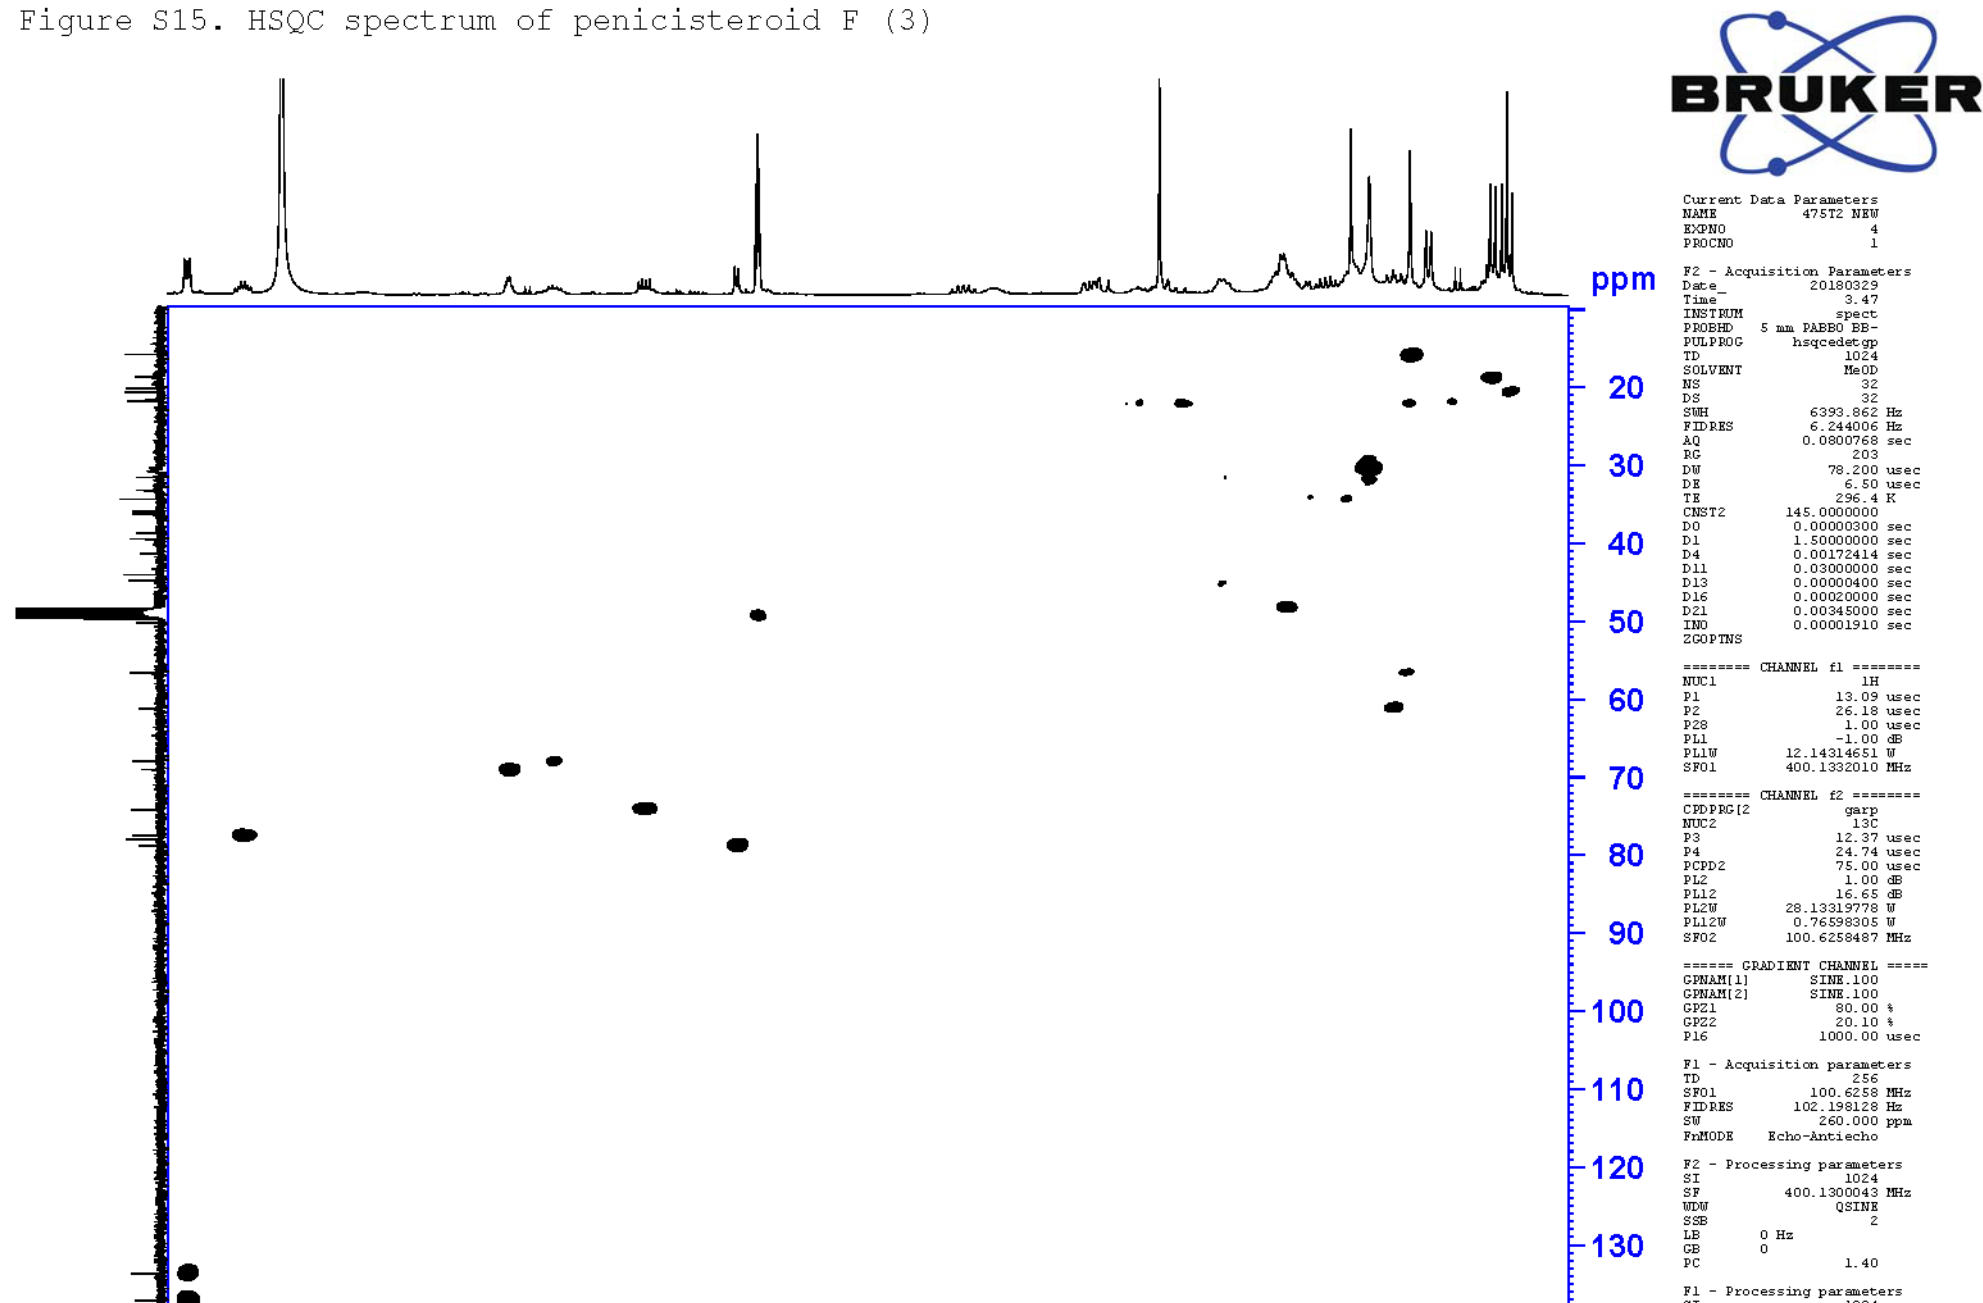



Figure S16. COSY spectrum of penicisteroid F (3)

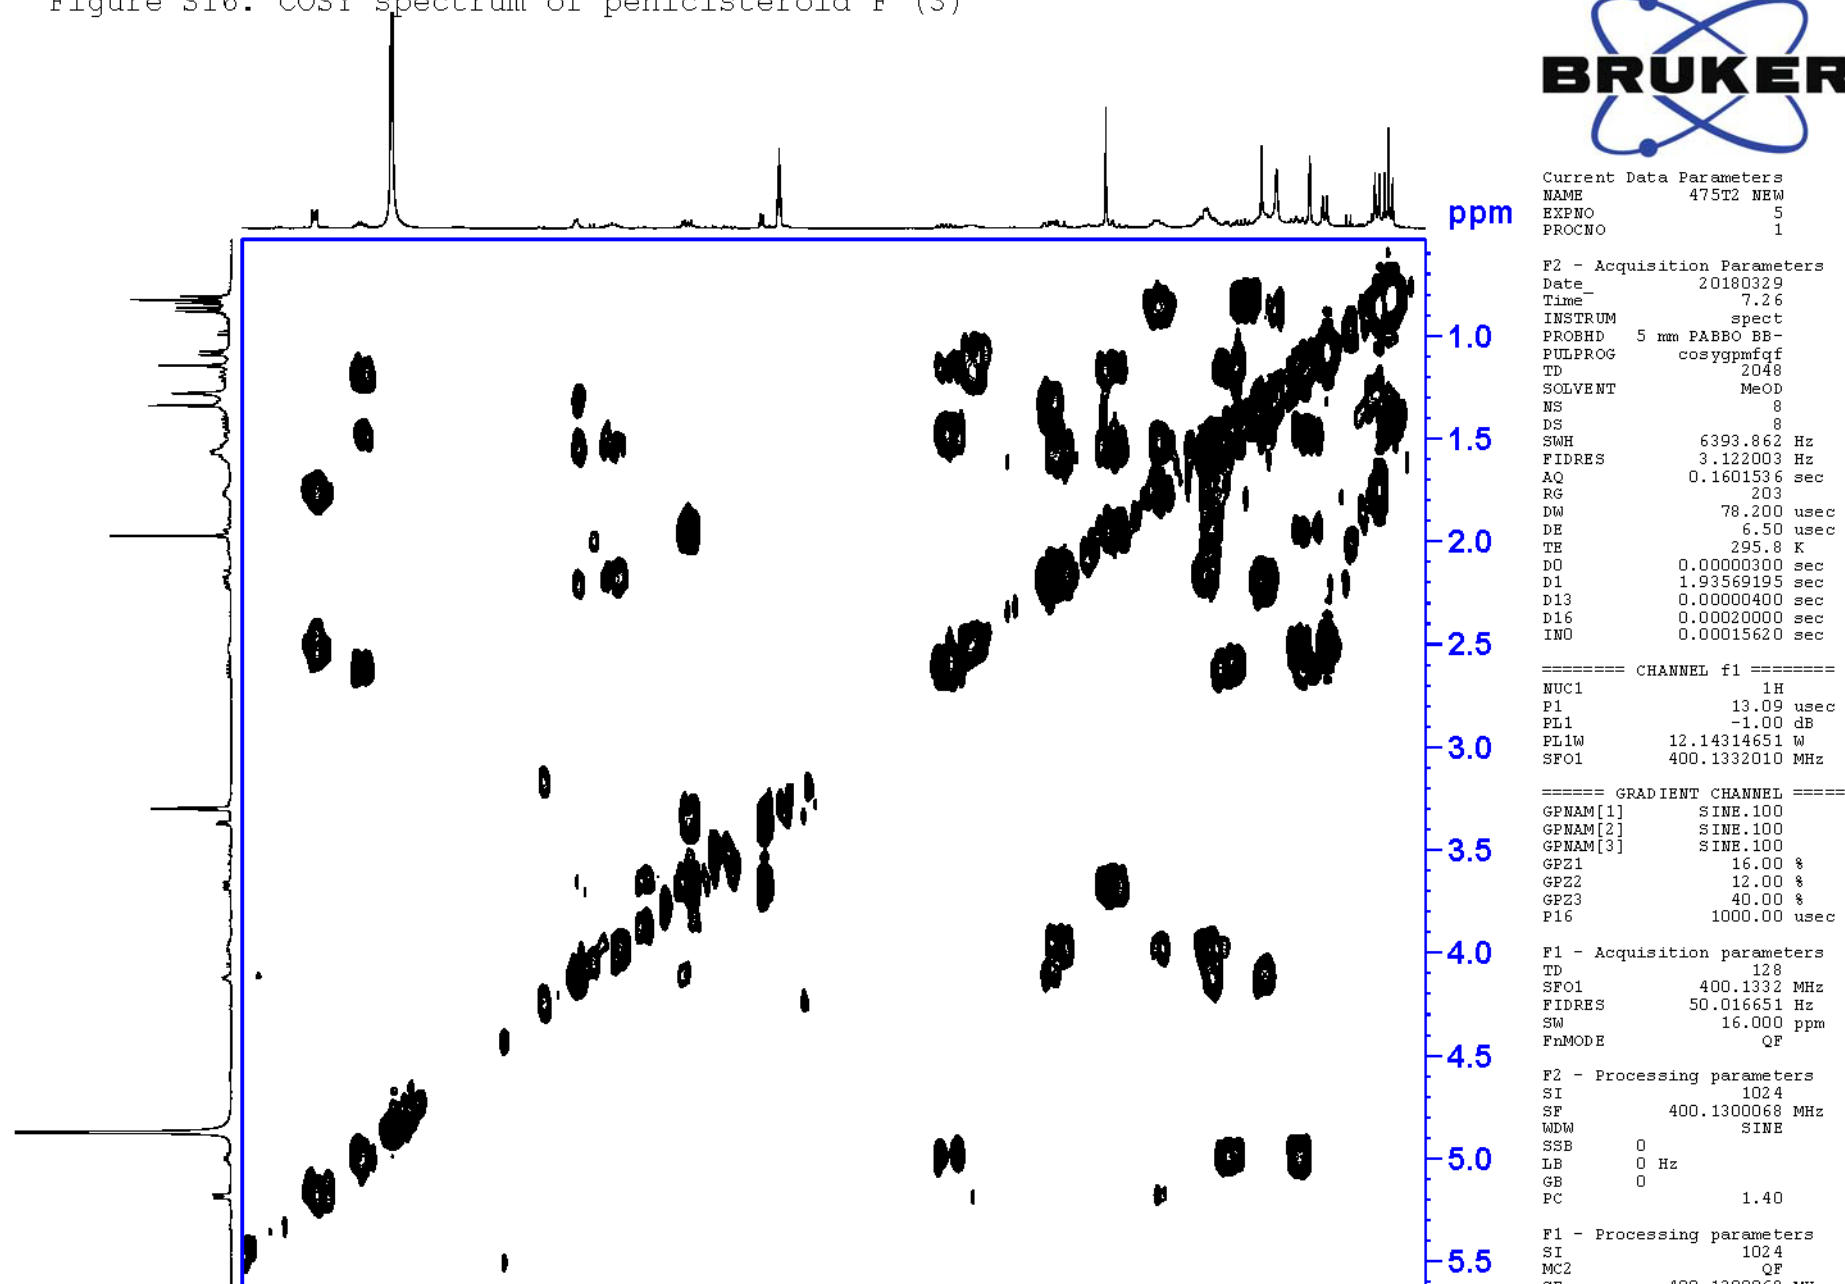

Figure S17. HMBC spectrum of penicisteroid F (3)

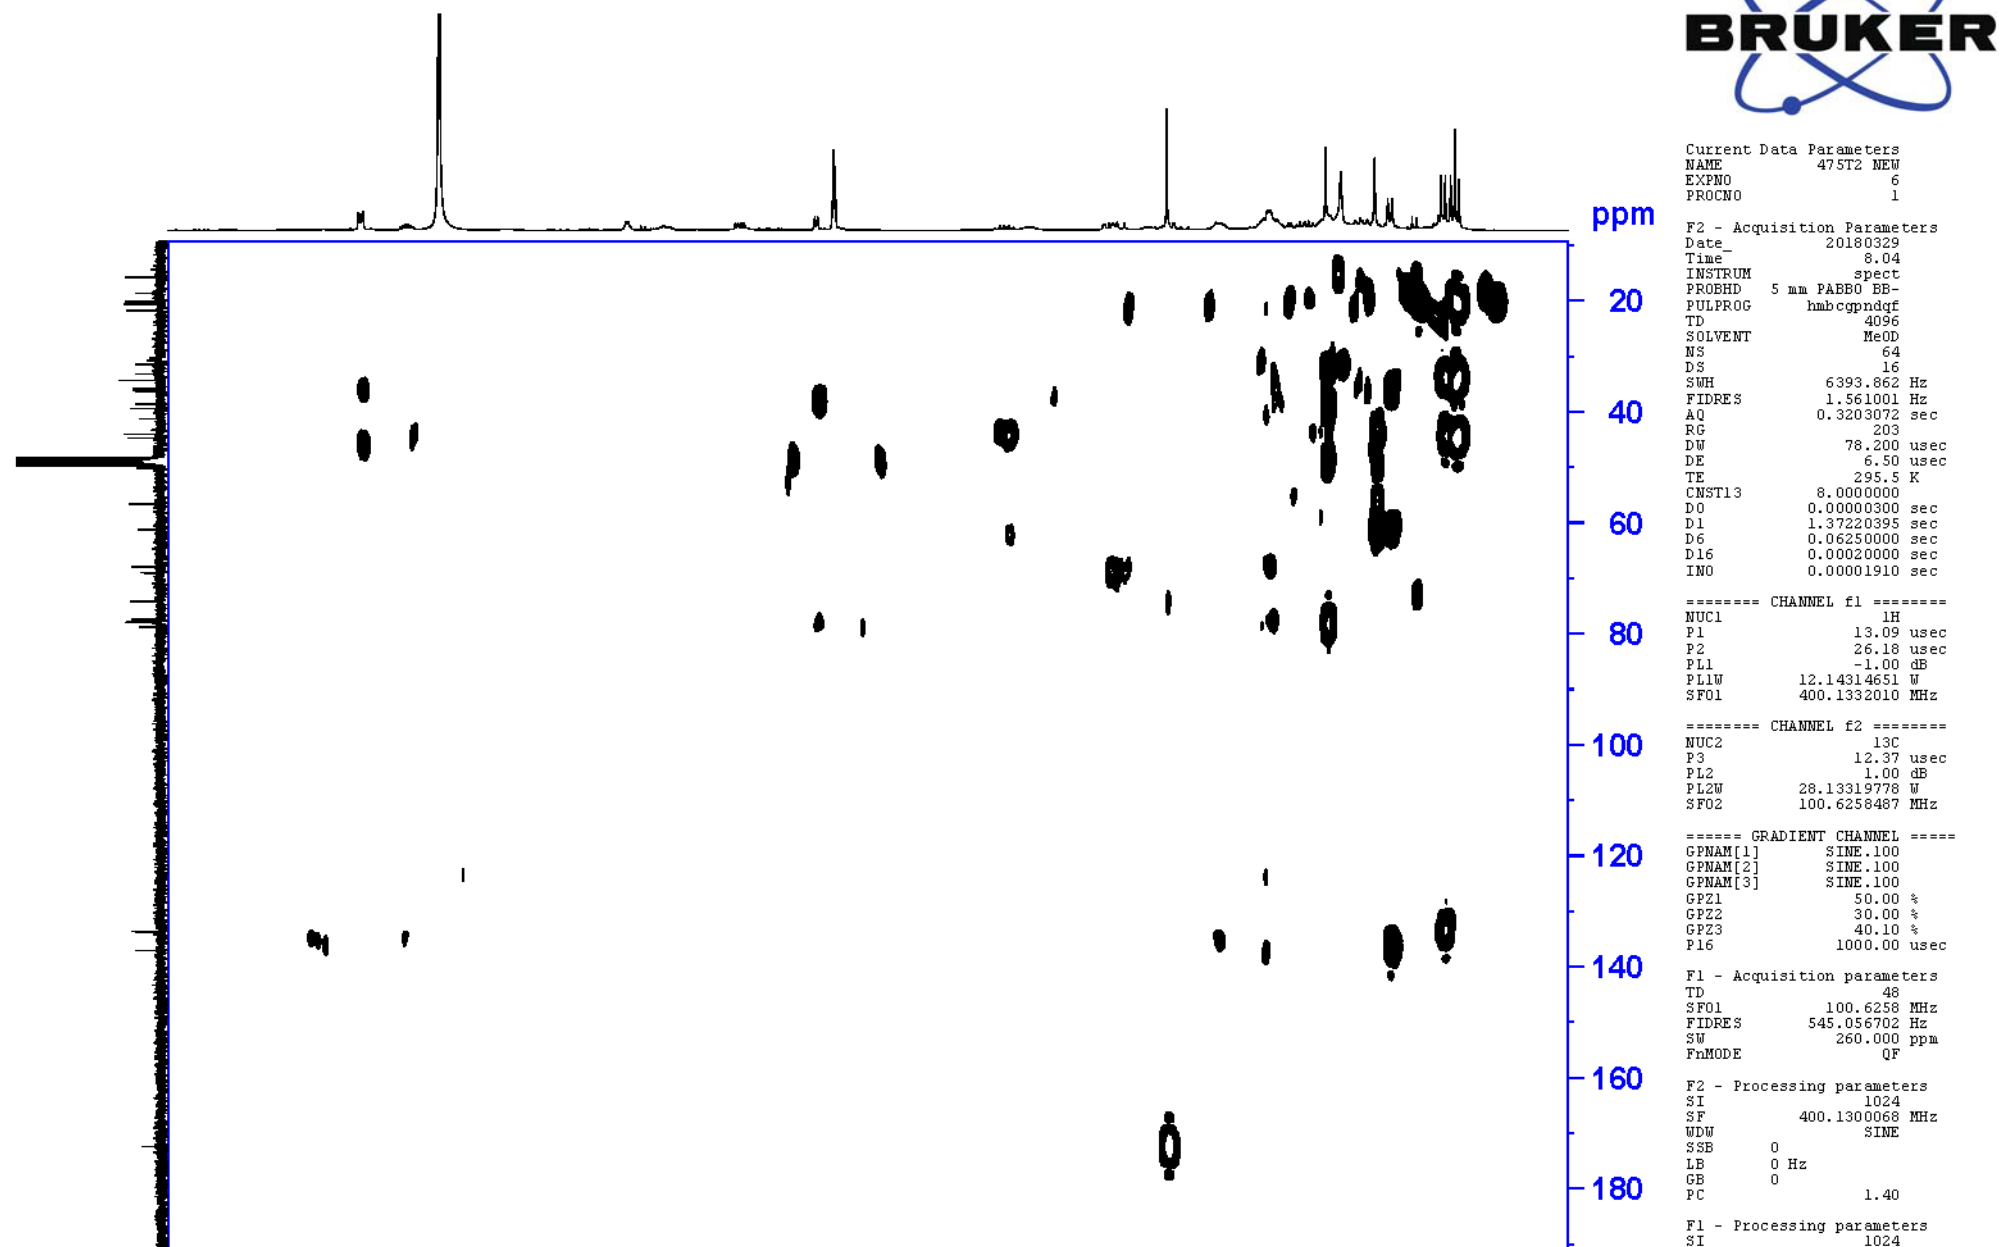

Figure S18. NOESY spectrum of penicisteroid F (3).

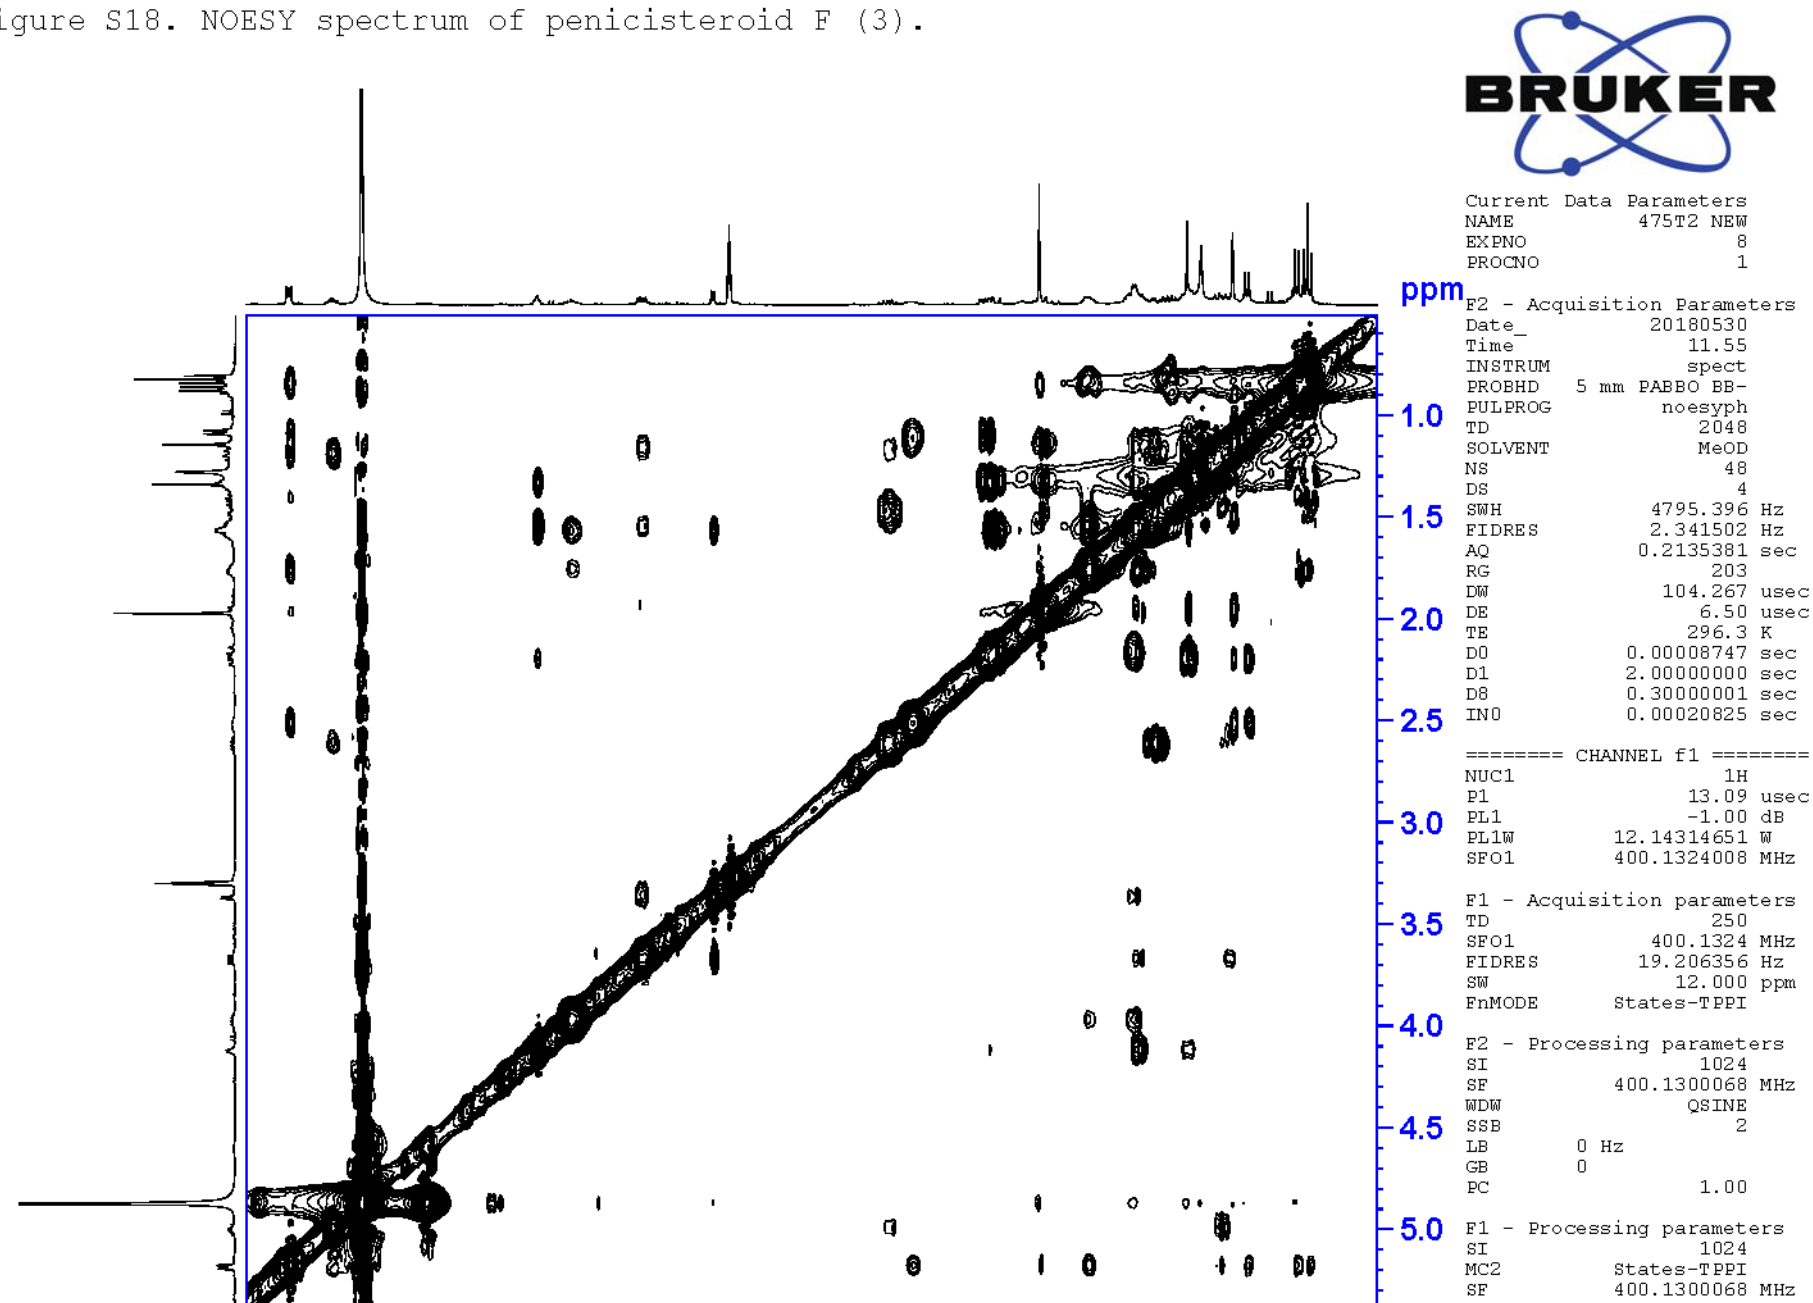

Figure S19. <sup>1</sup>H-NMR spectrum of penicisteroid G (4)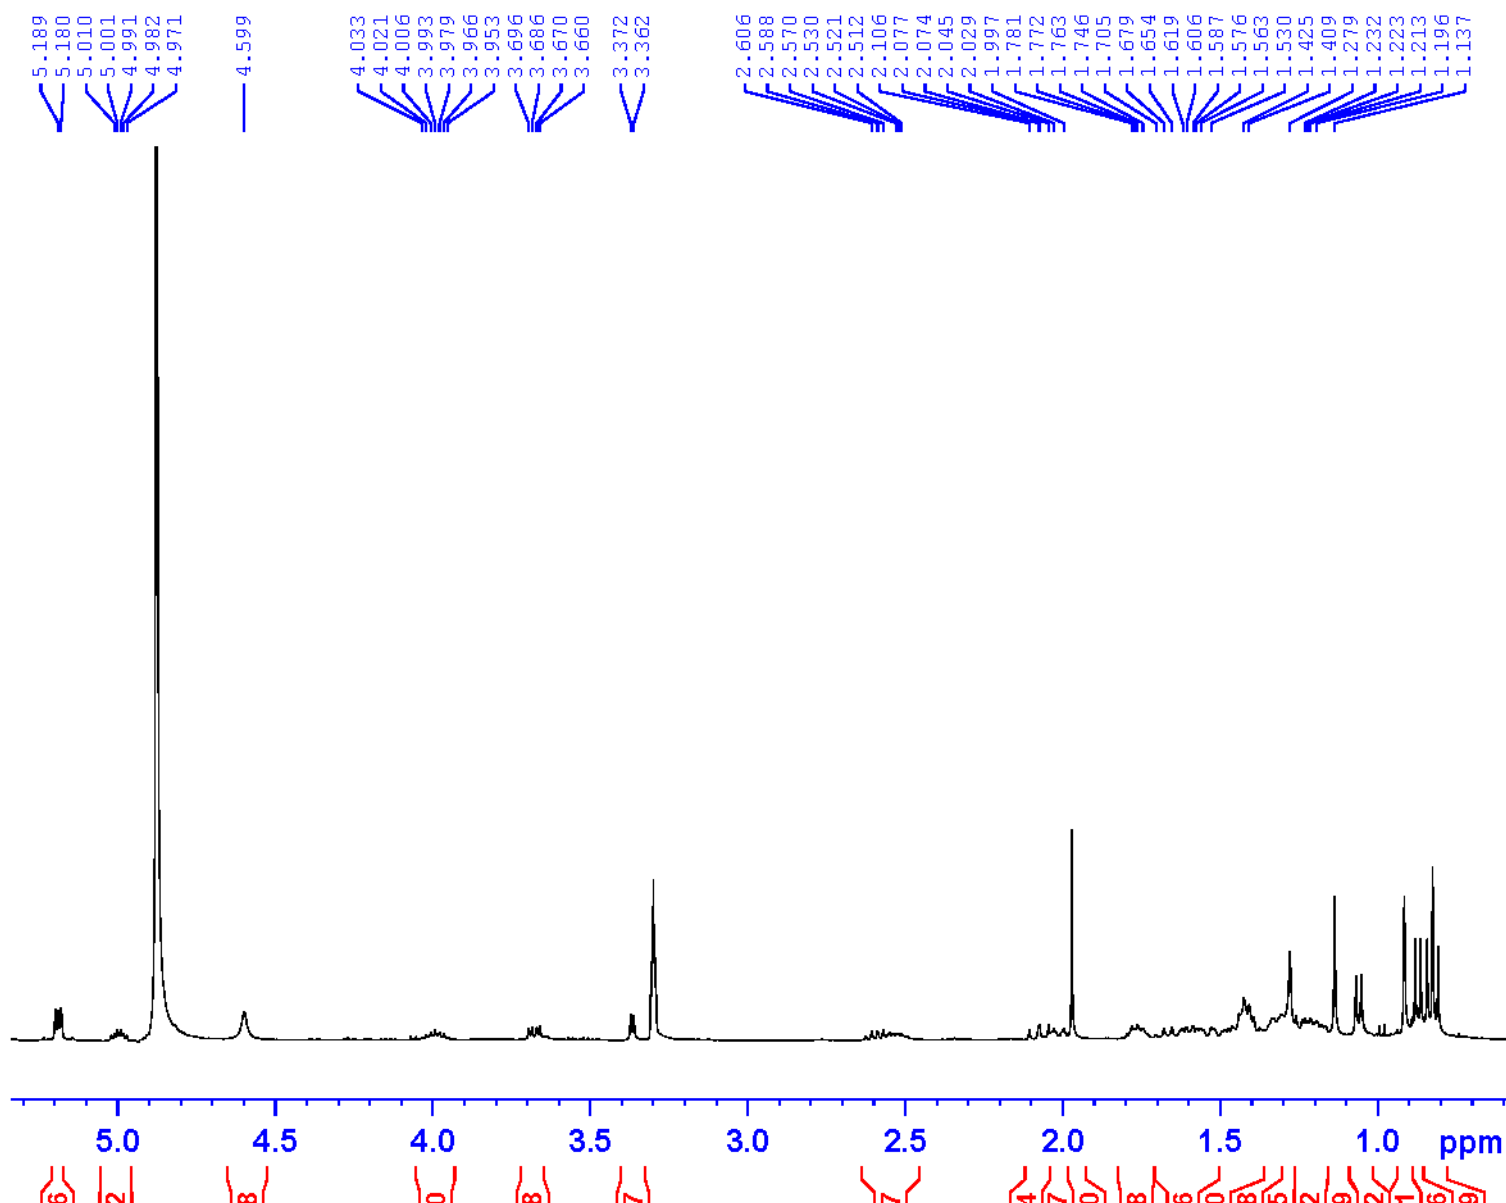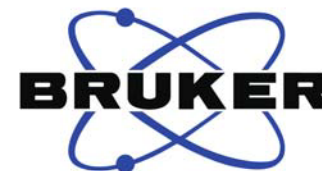

Current Data Parameters  
NAME 475T4 NEW  
EXPNO 1  
PROCNO 1

F2 - Acquisition Parameters  
Date\_ 20180523  
Time\_ 10.03  
INSTRUM spect  
PROBHD 5 mm PABBO BB-  
PULPROG zg30  
TD 65536  
SOLVENT MeOD  
NS 56  
DS 2  
SWH 8223.685 Hz  
FIDRES 0.125483 Hz  
AQ 3.9845889 sec  
RG 203  
DW 60.800 usec  
DE 6.50 usec  
TE 300.0 K  
D1 1.00000000 sec  
TD0 1

===== CHANNEL f1 =====  
NUC1 1H  
P1 13.09 usec  
PL1 -1.00 dB  
PL1W 12.14314651 W  
SFO1 400.1324710 MHz

F2 - Processing parameters  
SI 32768  
SF 400.1300068 MHz  
WDW EM  
SSB 0  
LB 0.30 Hz  
GB 0  
PC 1.00

Figure S20.  $^{13}\text{C}$ -NMR spectrum of penicisteroid G (4)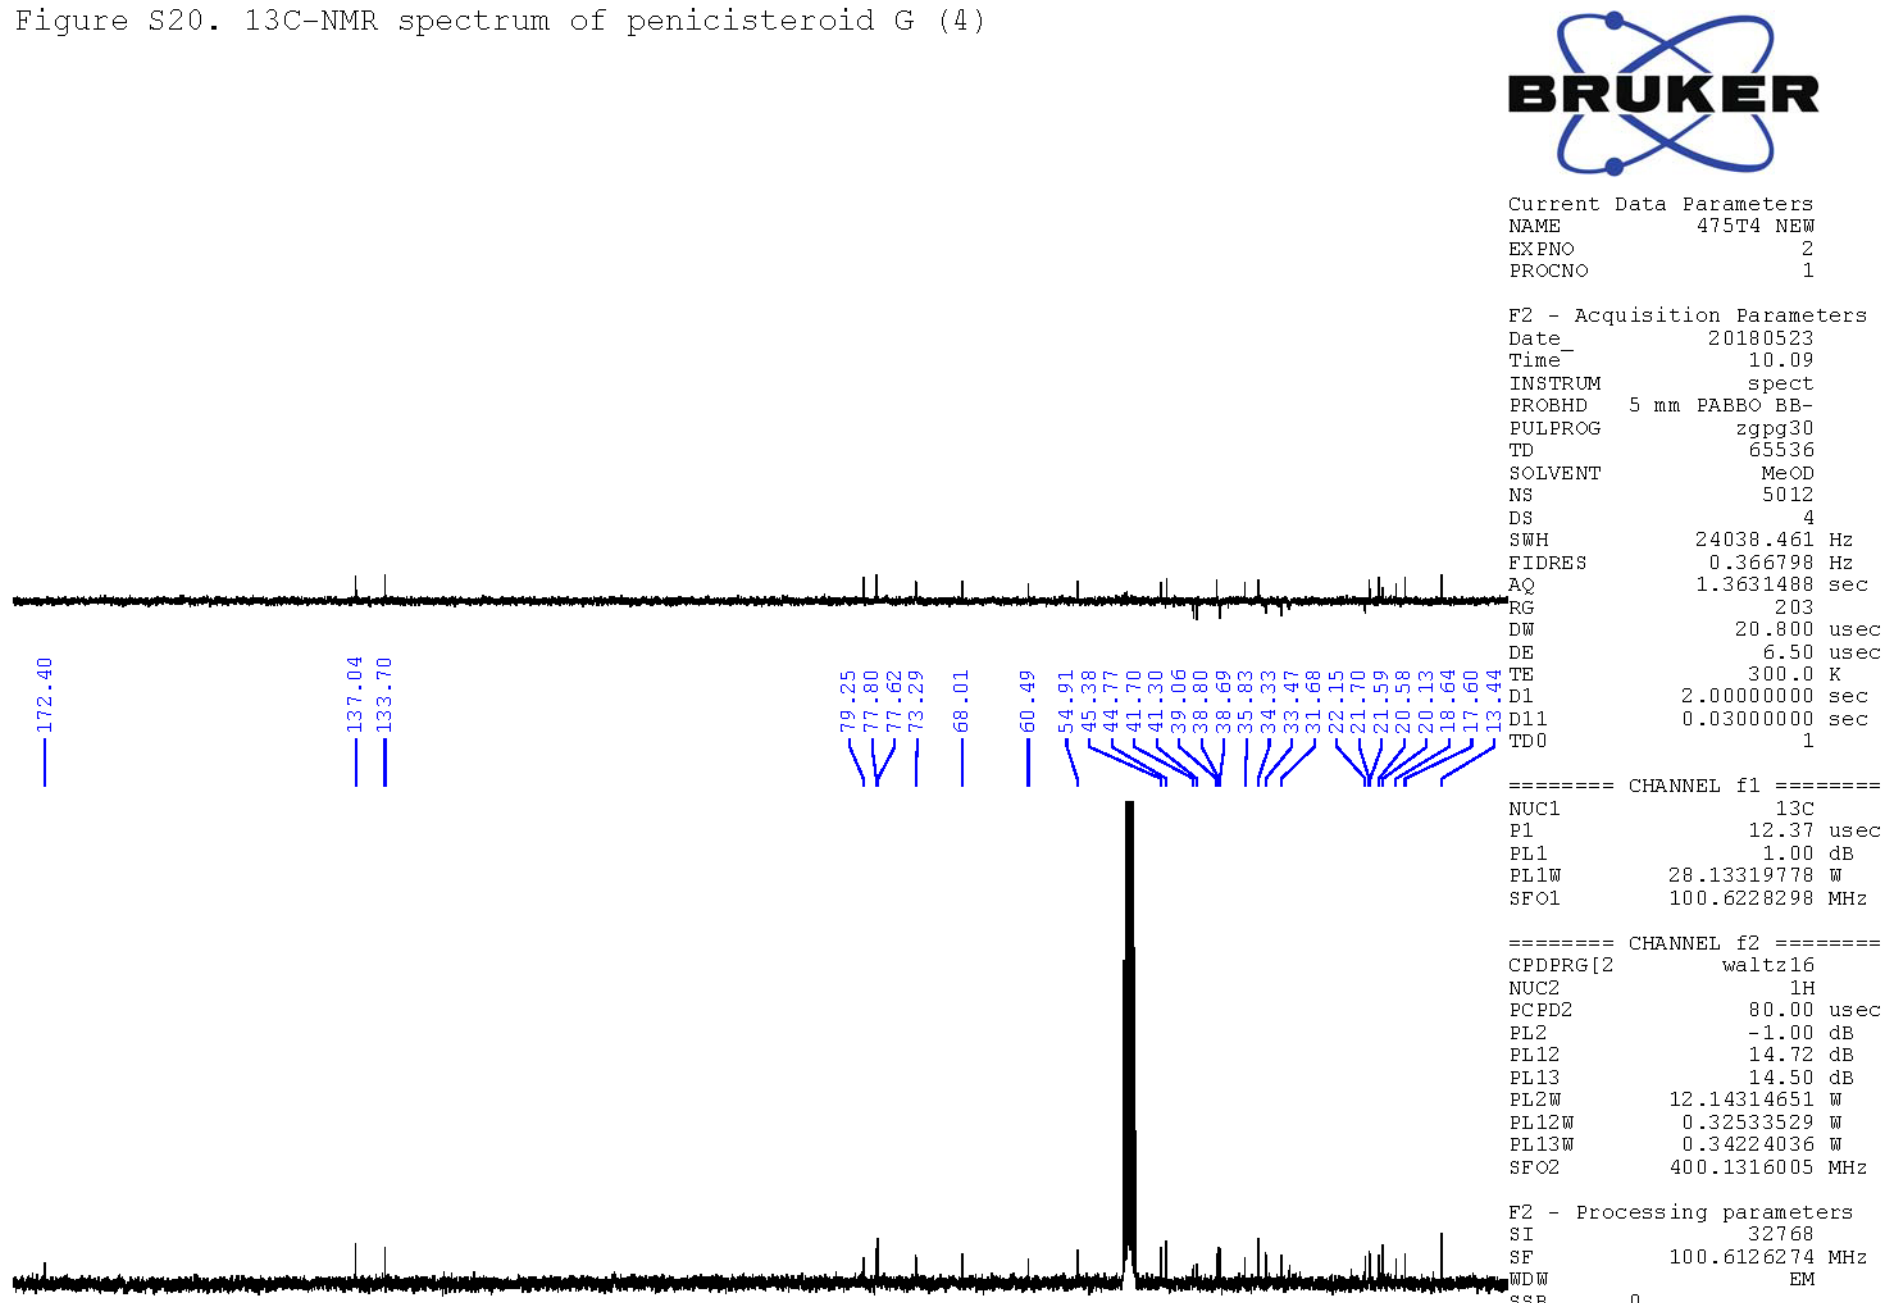

Figure S21. HSQC spectrum of penicisteroid G (4)

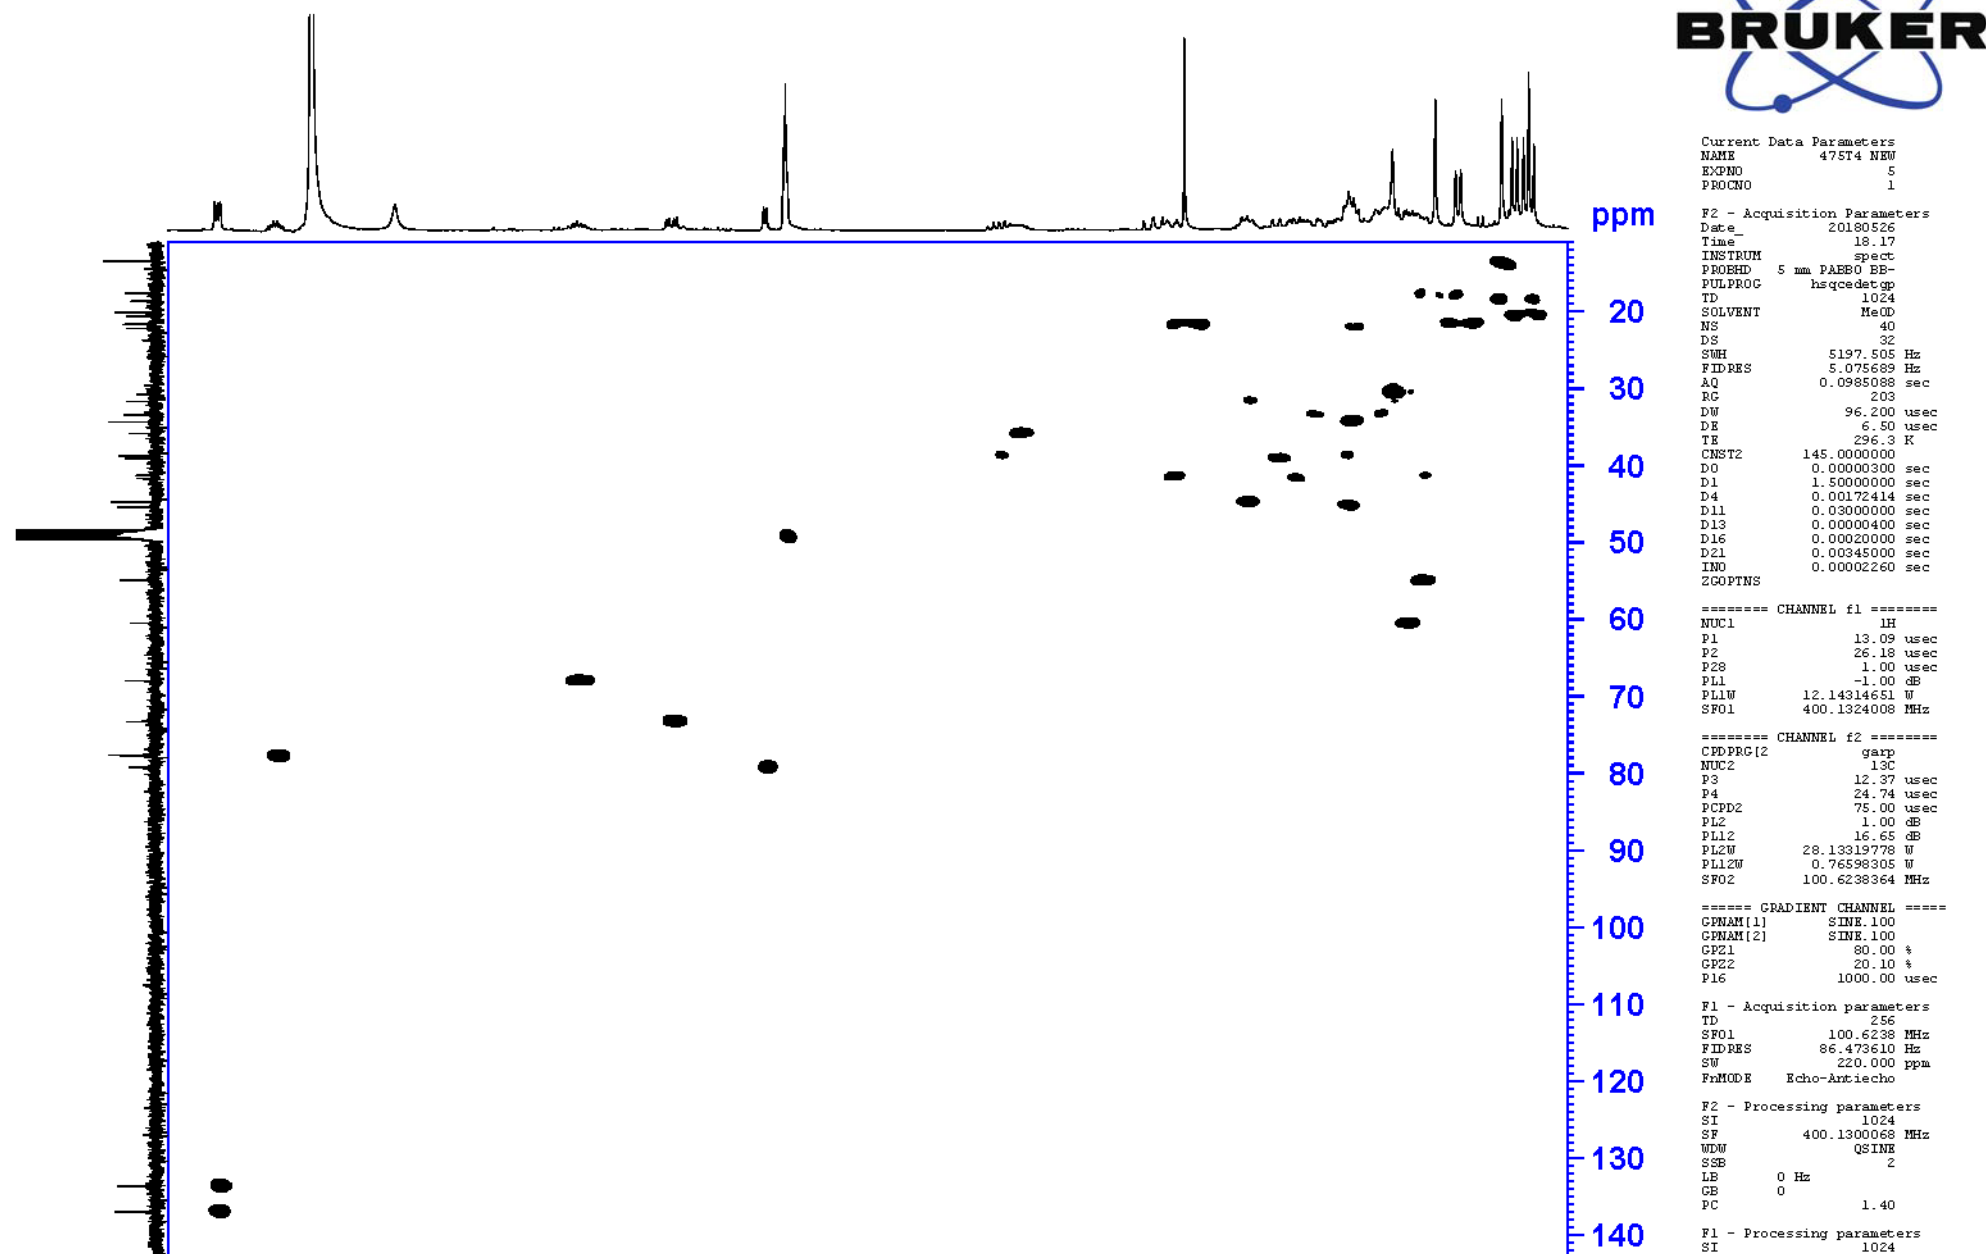

Figure S22. COSY spectrum of penicisteroid G (4)

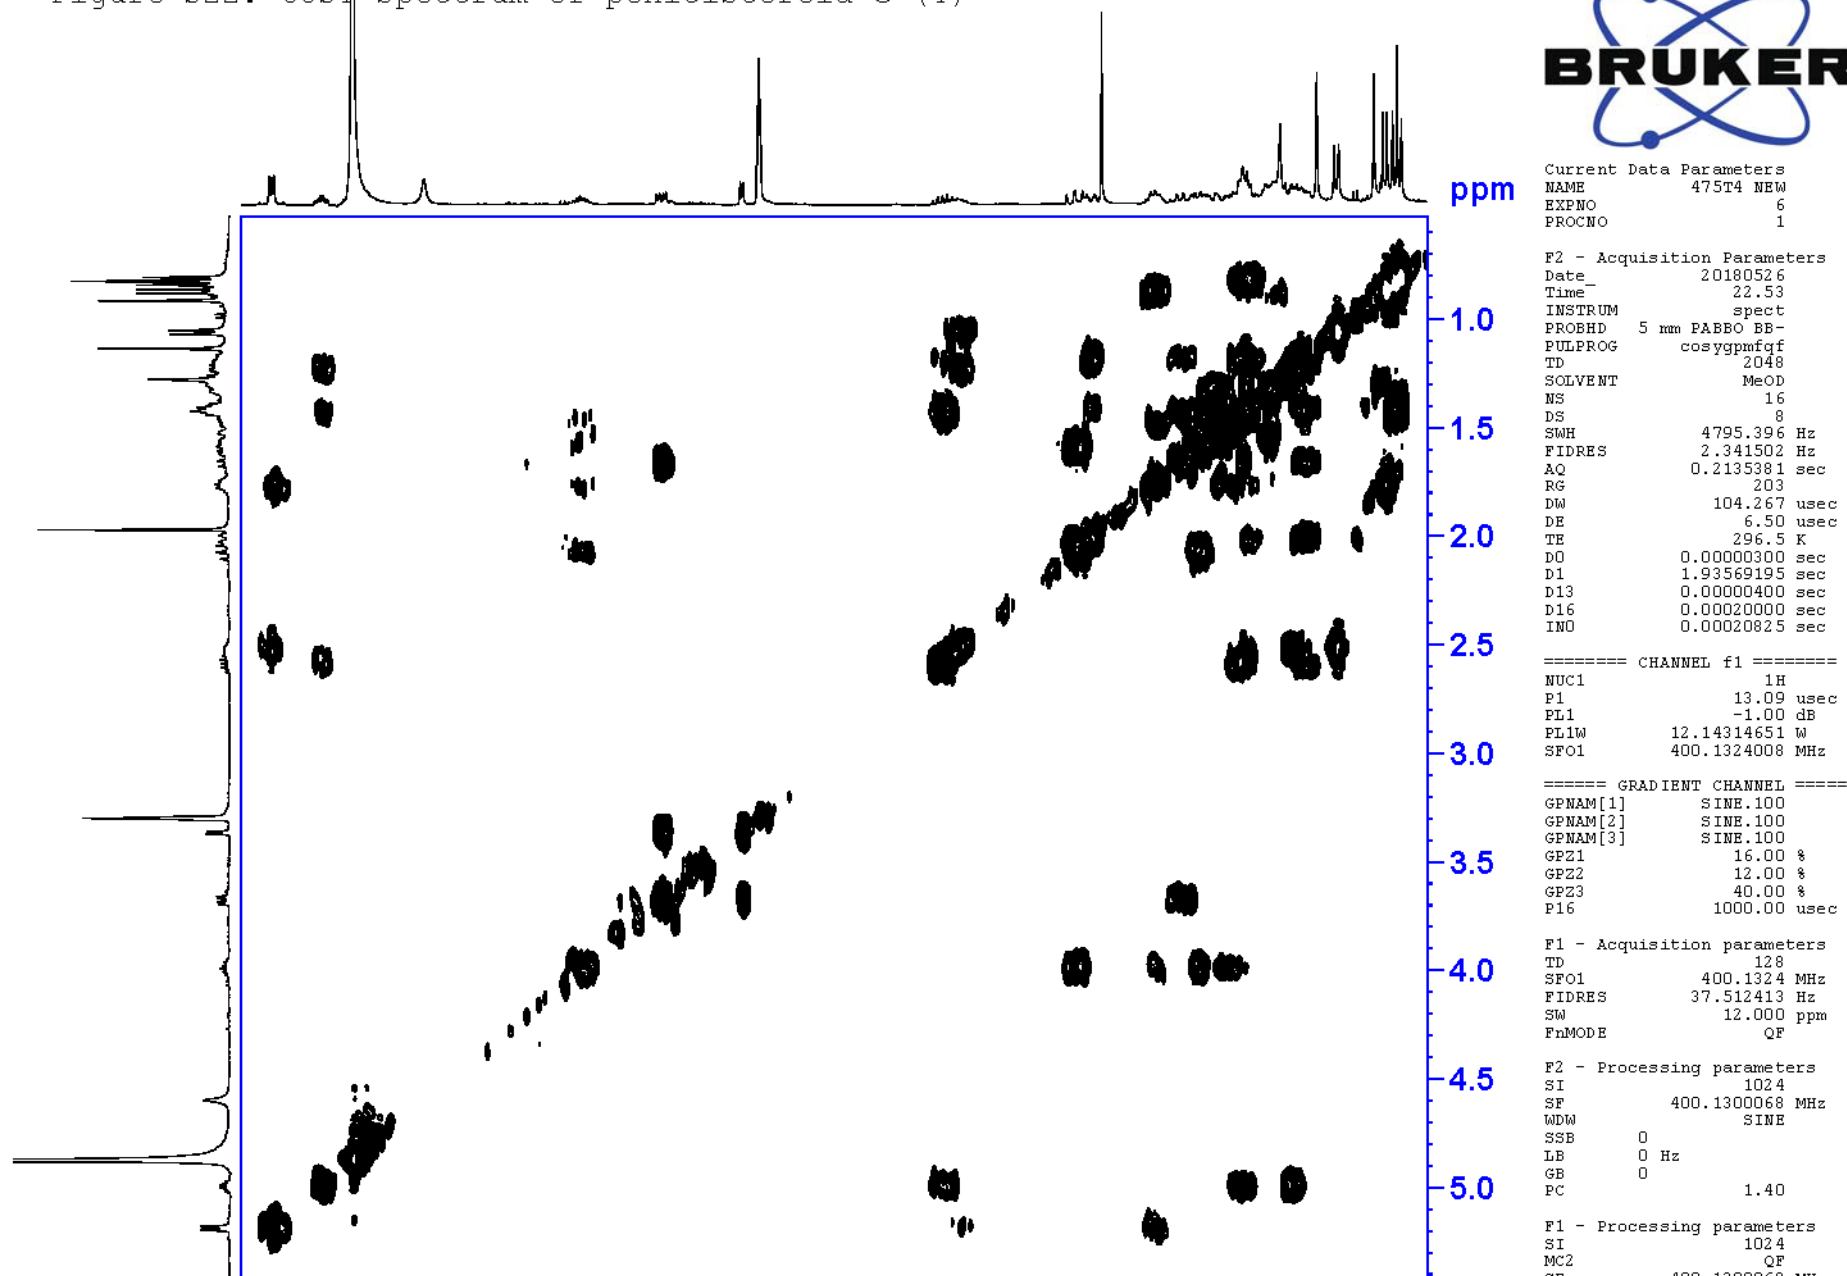

Figure S23. HMBC spectrum of penicisteroid G (4)

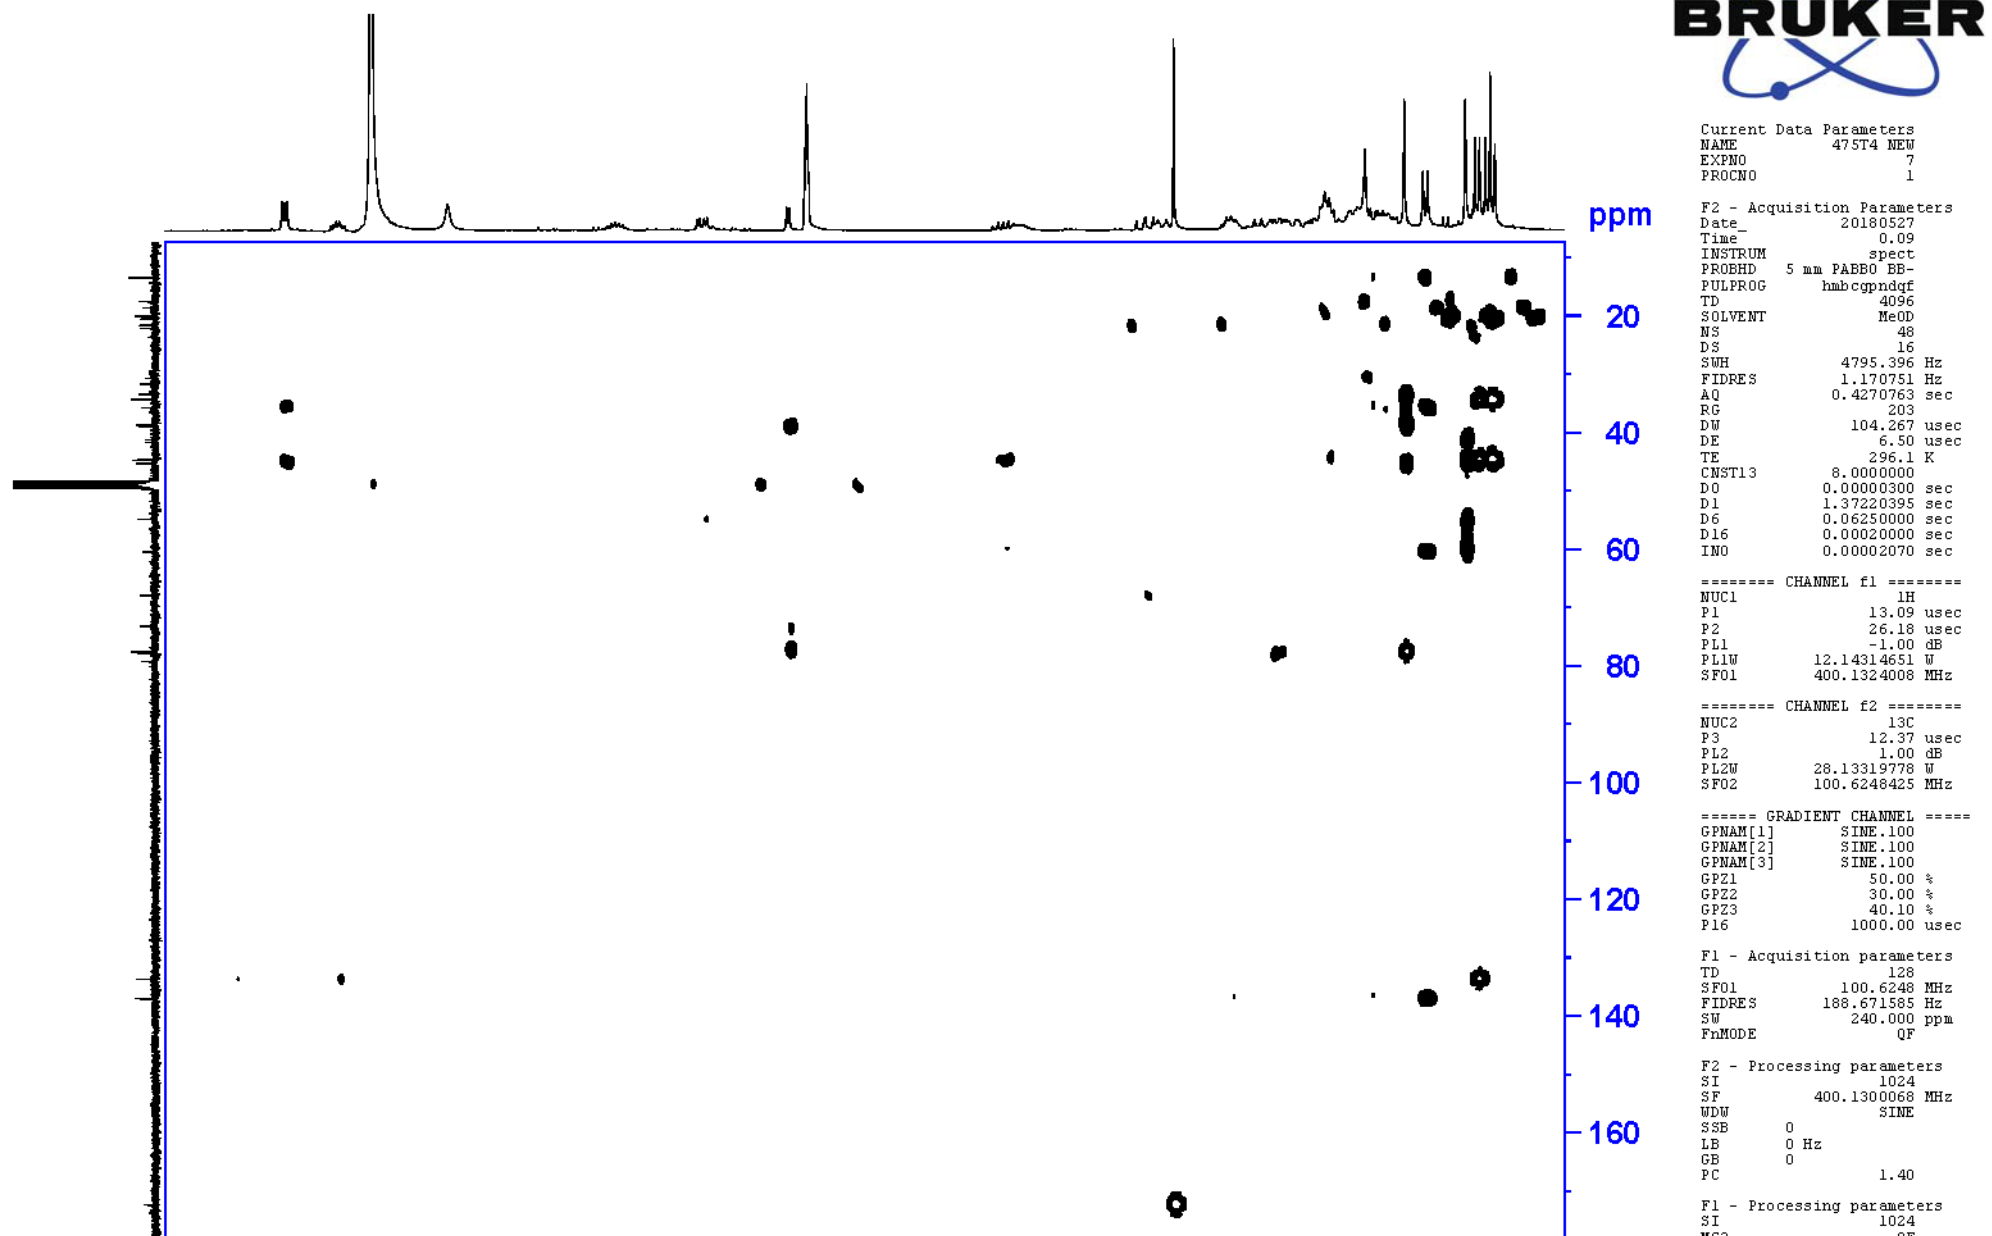



Figure S24. NOESY spectrum of penicisteroid G (4).

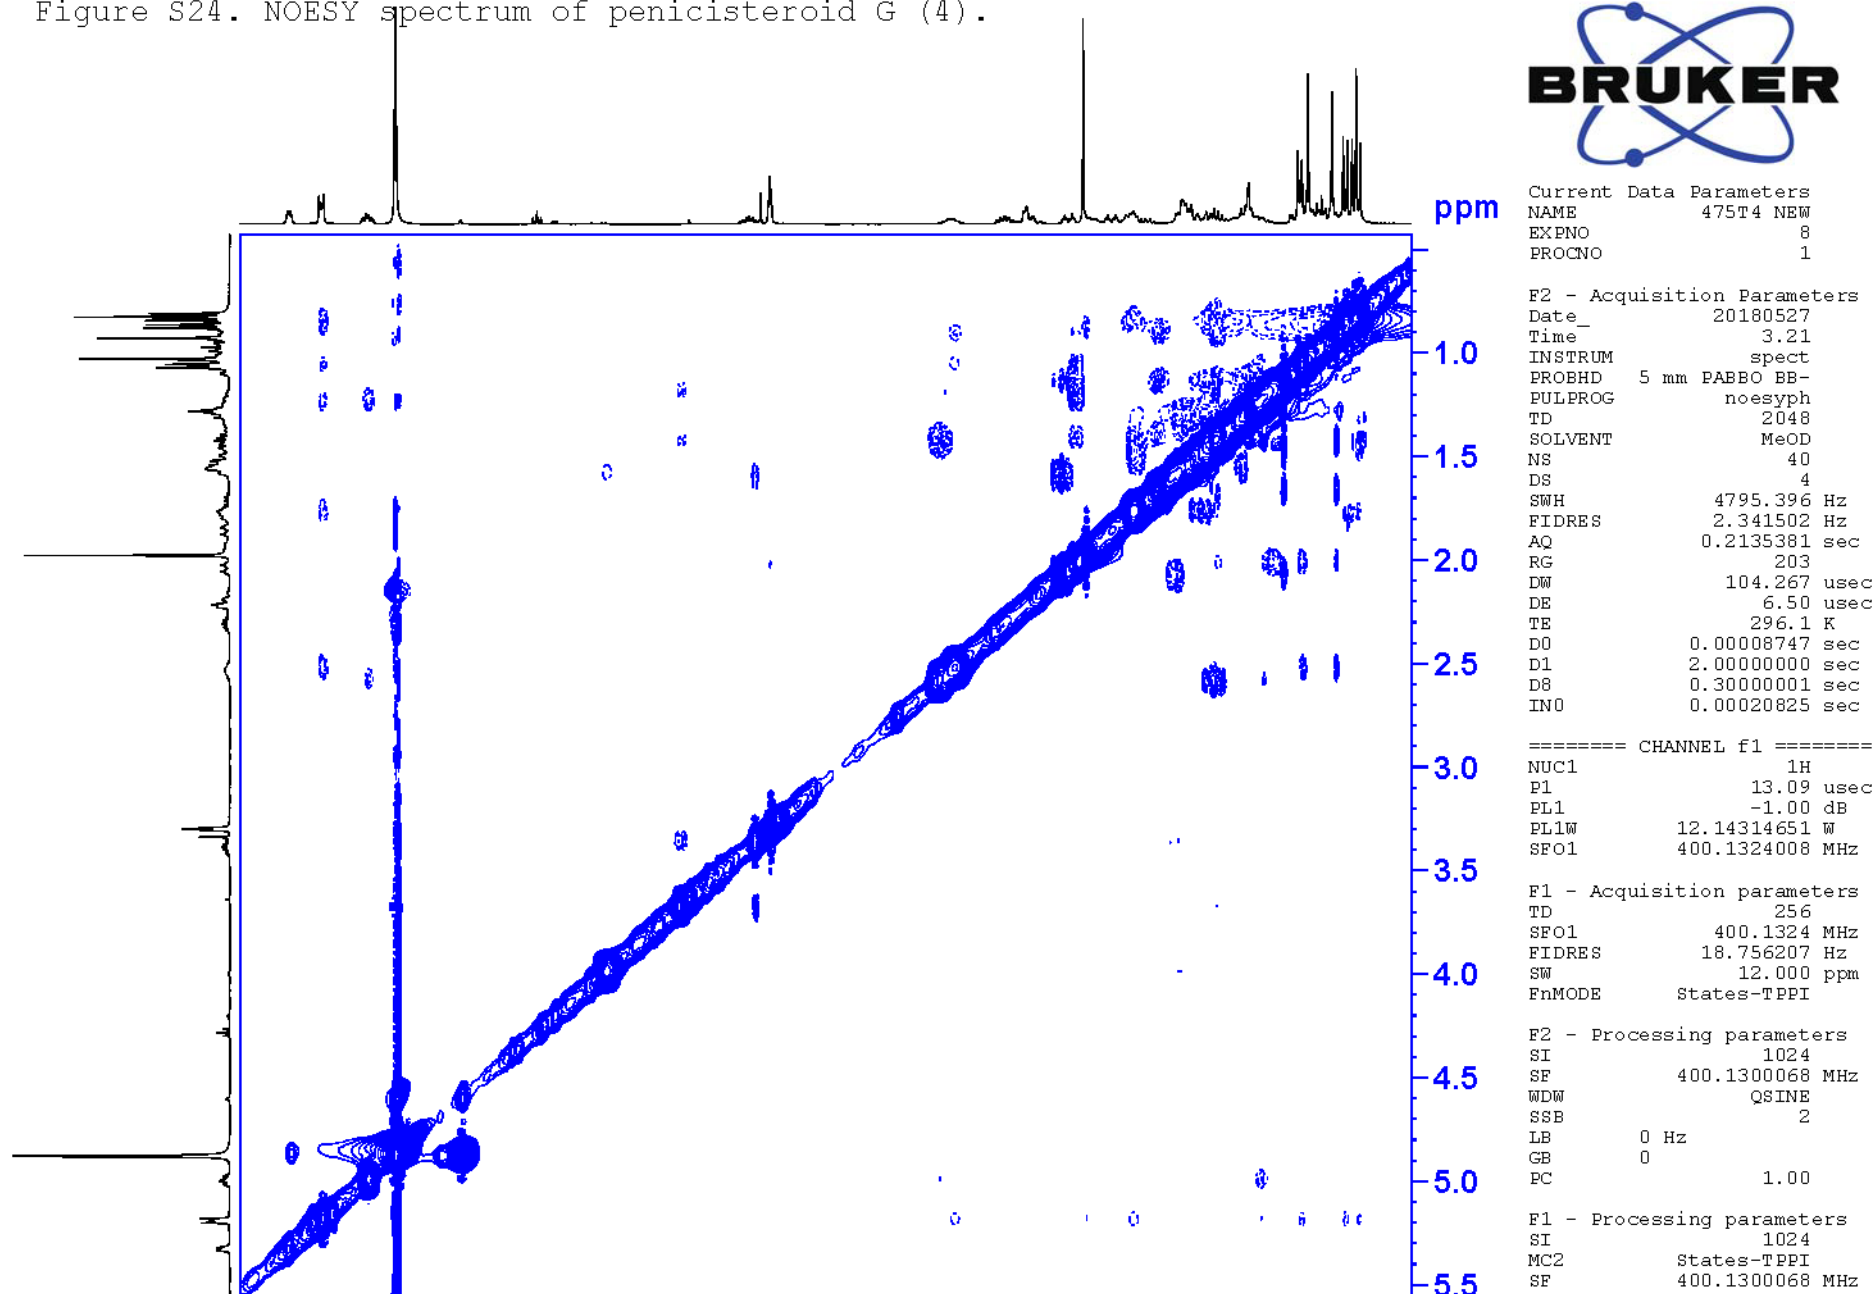

Figure S25. <sup>1</sup>H-NMR spectrum of penicisteroid H (5)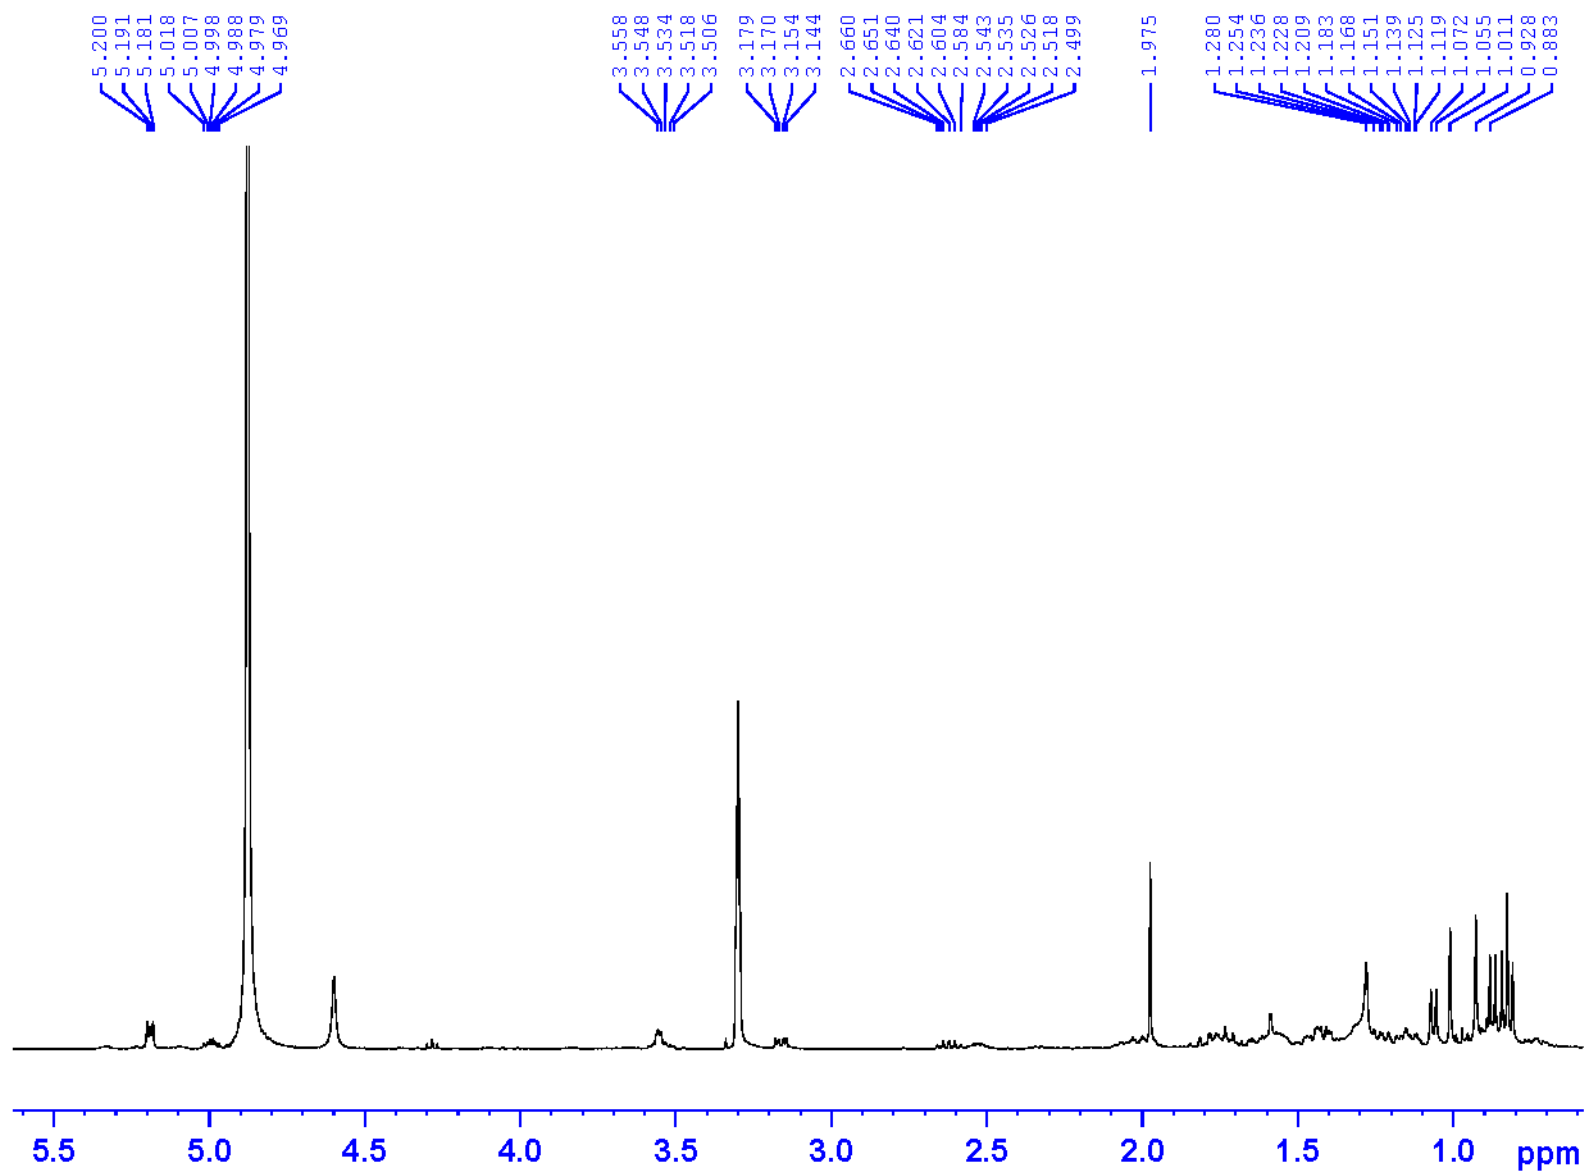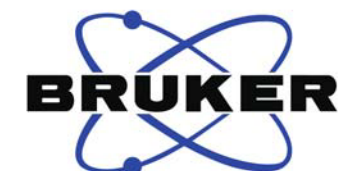

Current Data Parameters  
NAME 475T48 D NEW  
EXPNO 1  
PROCNO 1

F2 - Acquisition Parameters  
Date\_ 20180509  
Time\_ 21.49  
INSTRUM spect  
PROBHD 5 mm PABBO BB-  
PULPROG zg30  
TD 65536  
SOLVENT MeOD  
NS 49  
DS 0  
SWH 8223.685 Hz  
FIDRES 0.125483 Hz  
AQ 3.9845889 sec  
RG 203  
DW 60.800 usec  
DE 6.50 usec  
TE 296.1 K  
D1 2.00000000 sec  
TD0 1

===== CHANNEL f1 =====  
NUC1 1H  
P1 13.09 usec  
PL1 -1.00 dB  
PL1W 12.14314651 W  
SFO1 400.1324710 MHz

F2 - Processing parameters  
SI 32768  
SF 400.1300065 MHz  
WDW EM  
SSB 0  
LB 0.30 Hz  
GB 0  
PC 1.00

Figure S26. <sup>13</sup>C-NMR spectrum of penicisteroid H (5)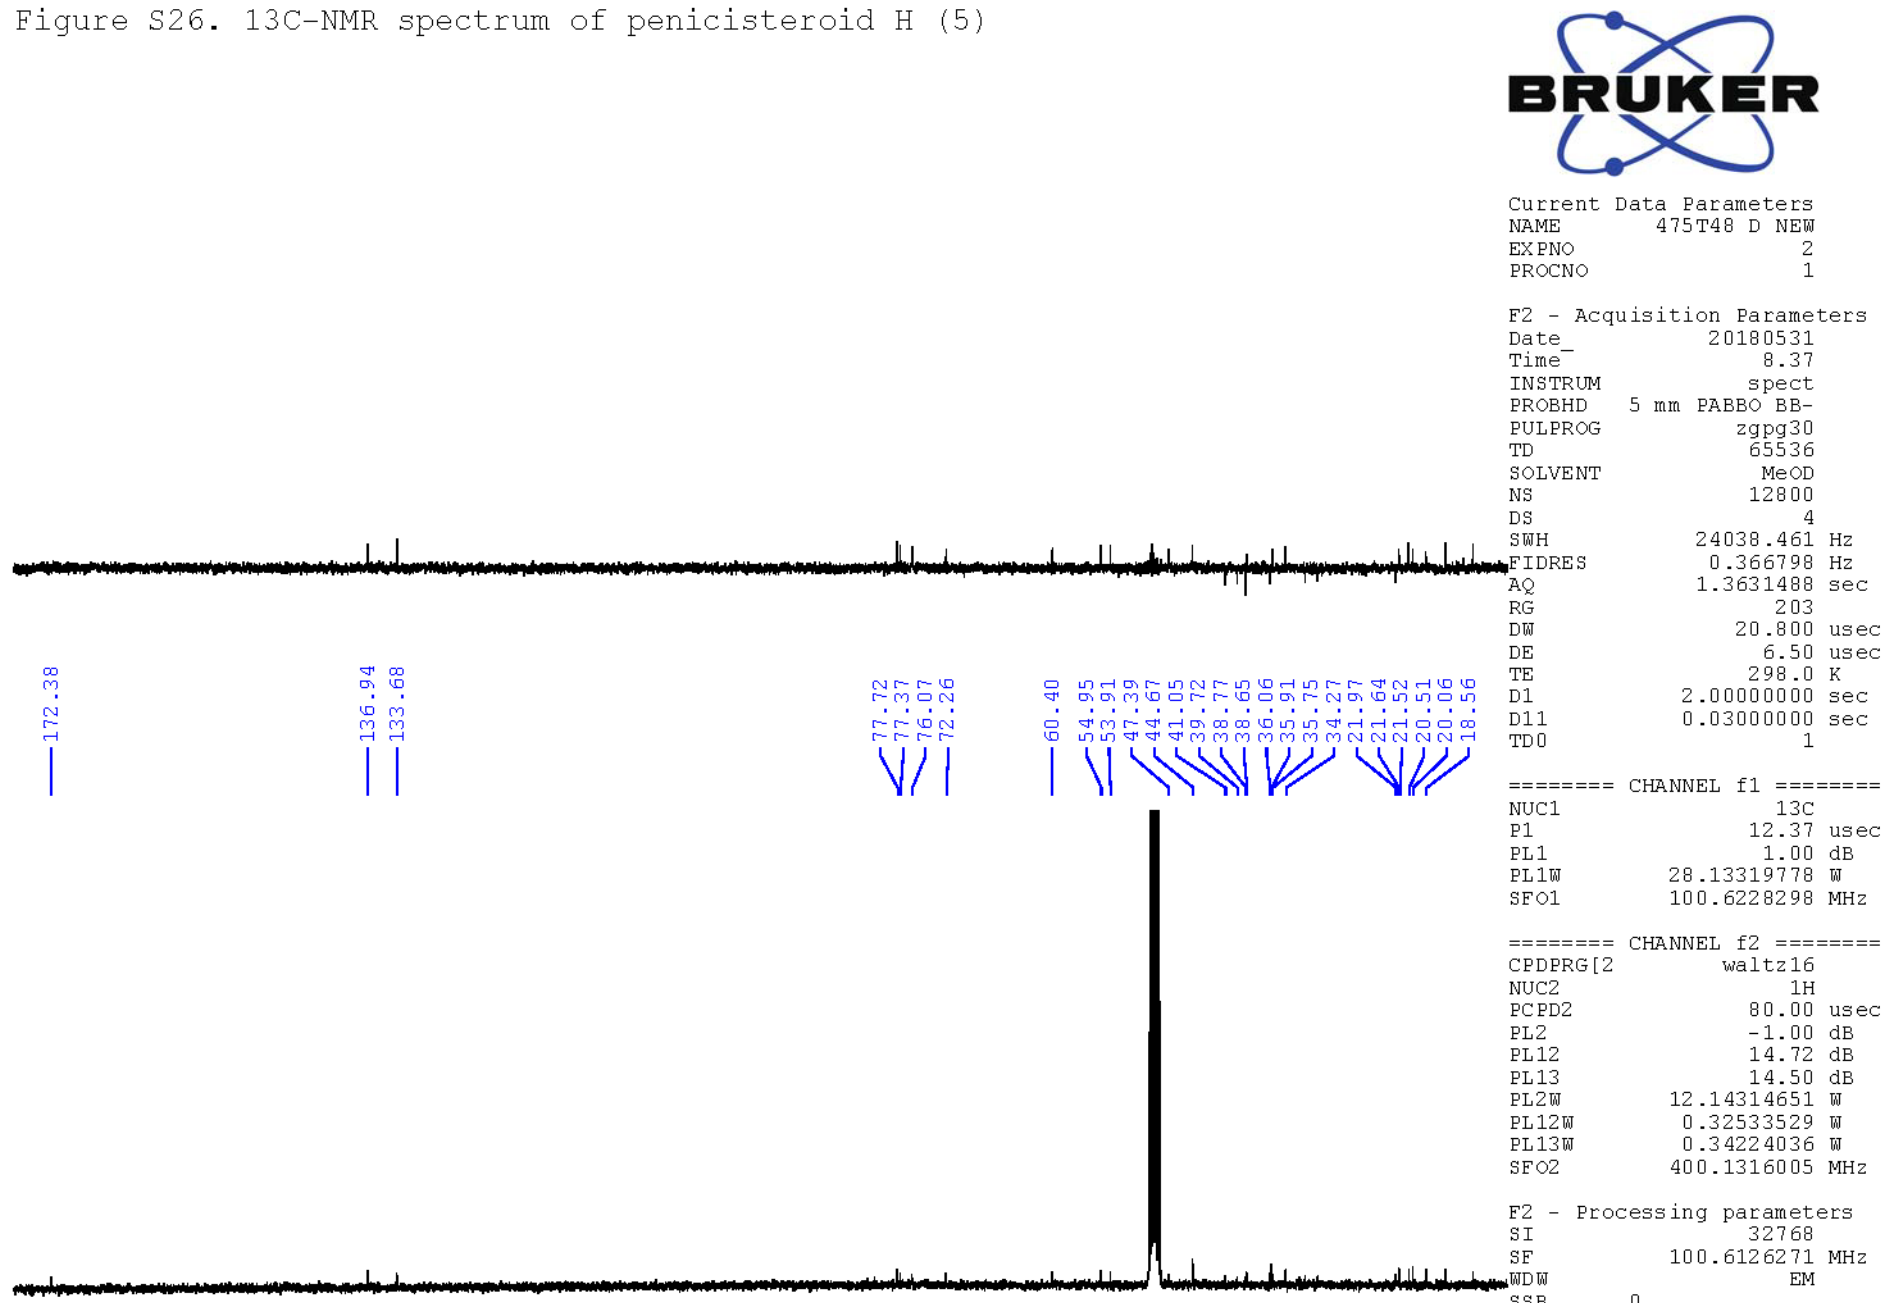

Figure S27. HSQC spectrum of penicisteroid H (5)

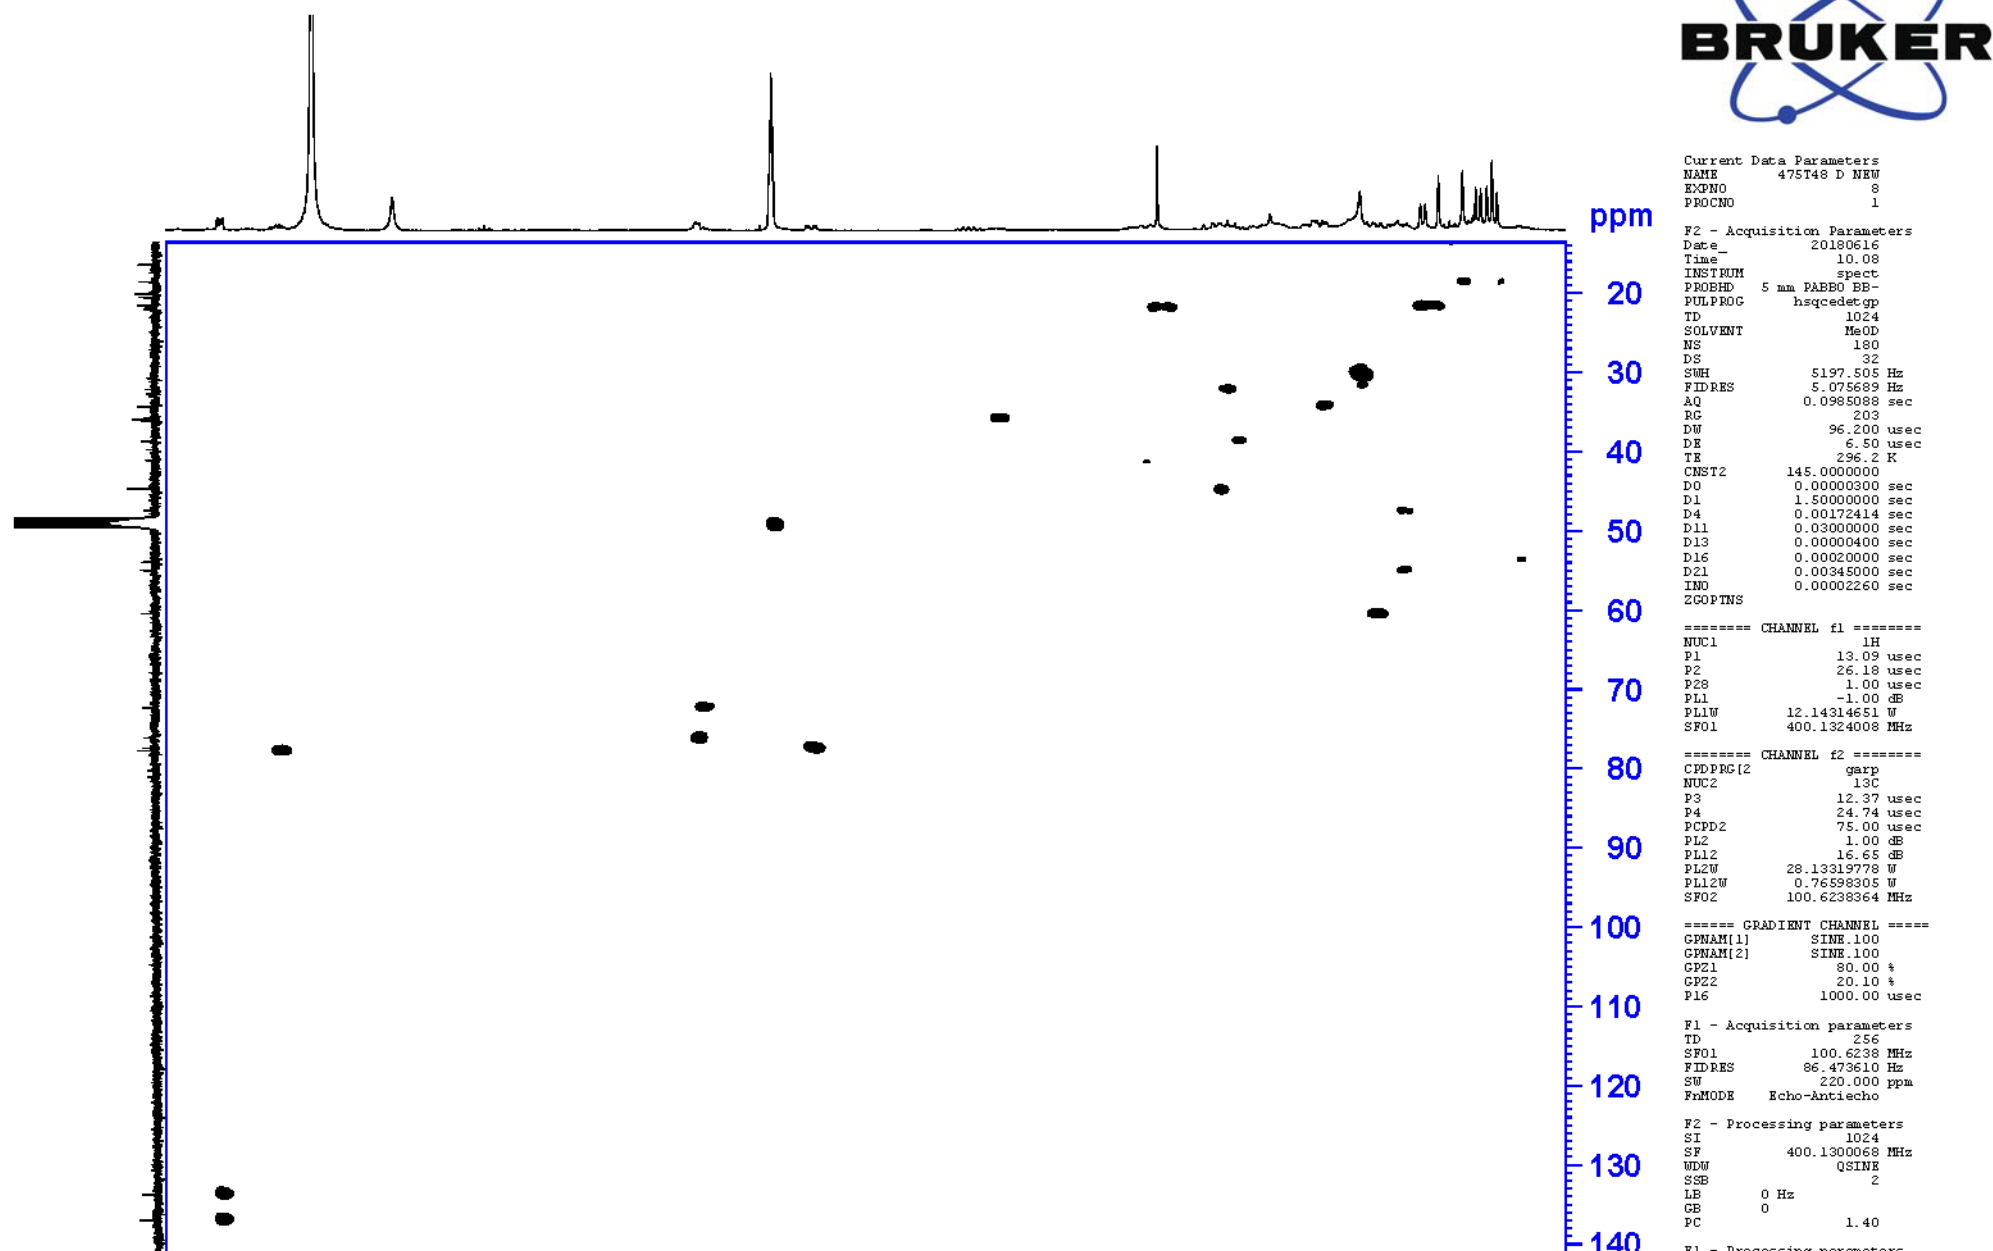

Figure S28. COSY spectrum of penicisteroid H (5)

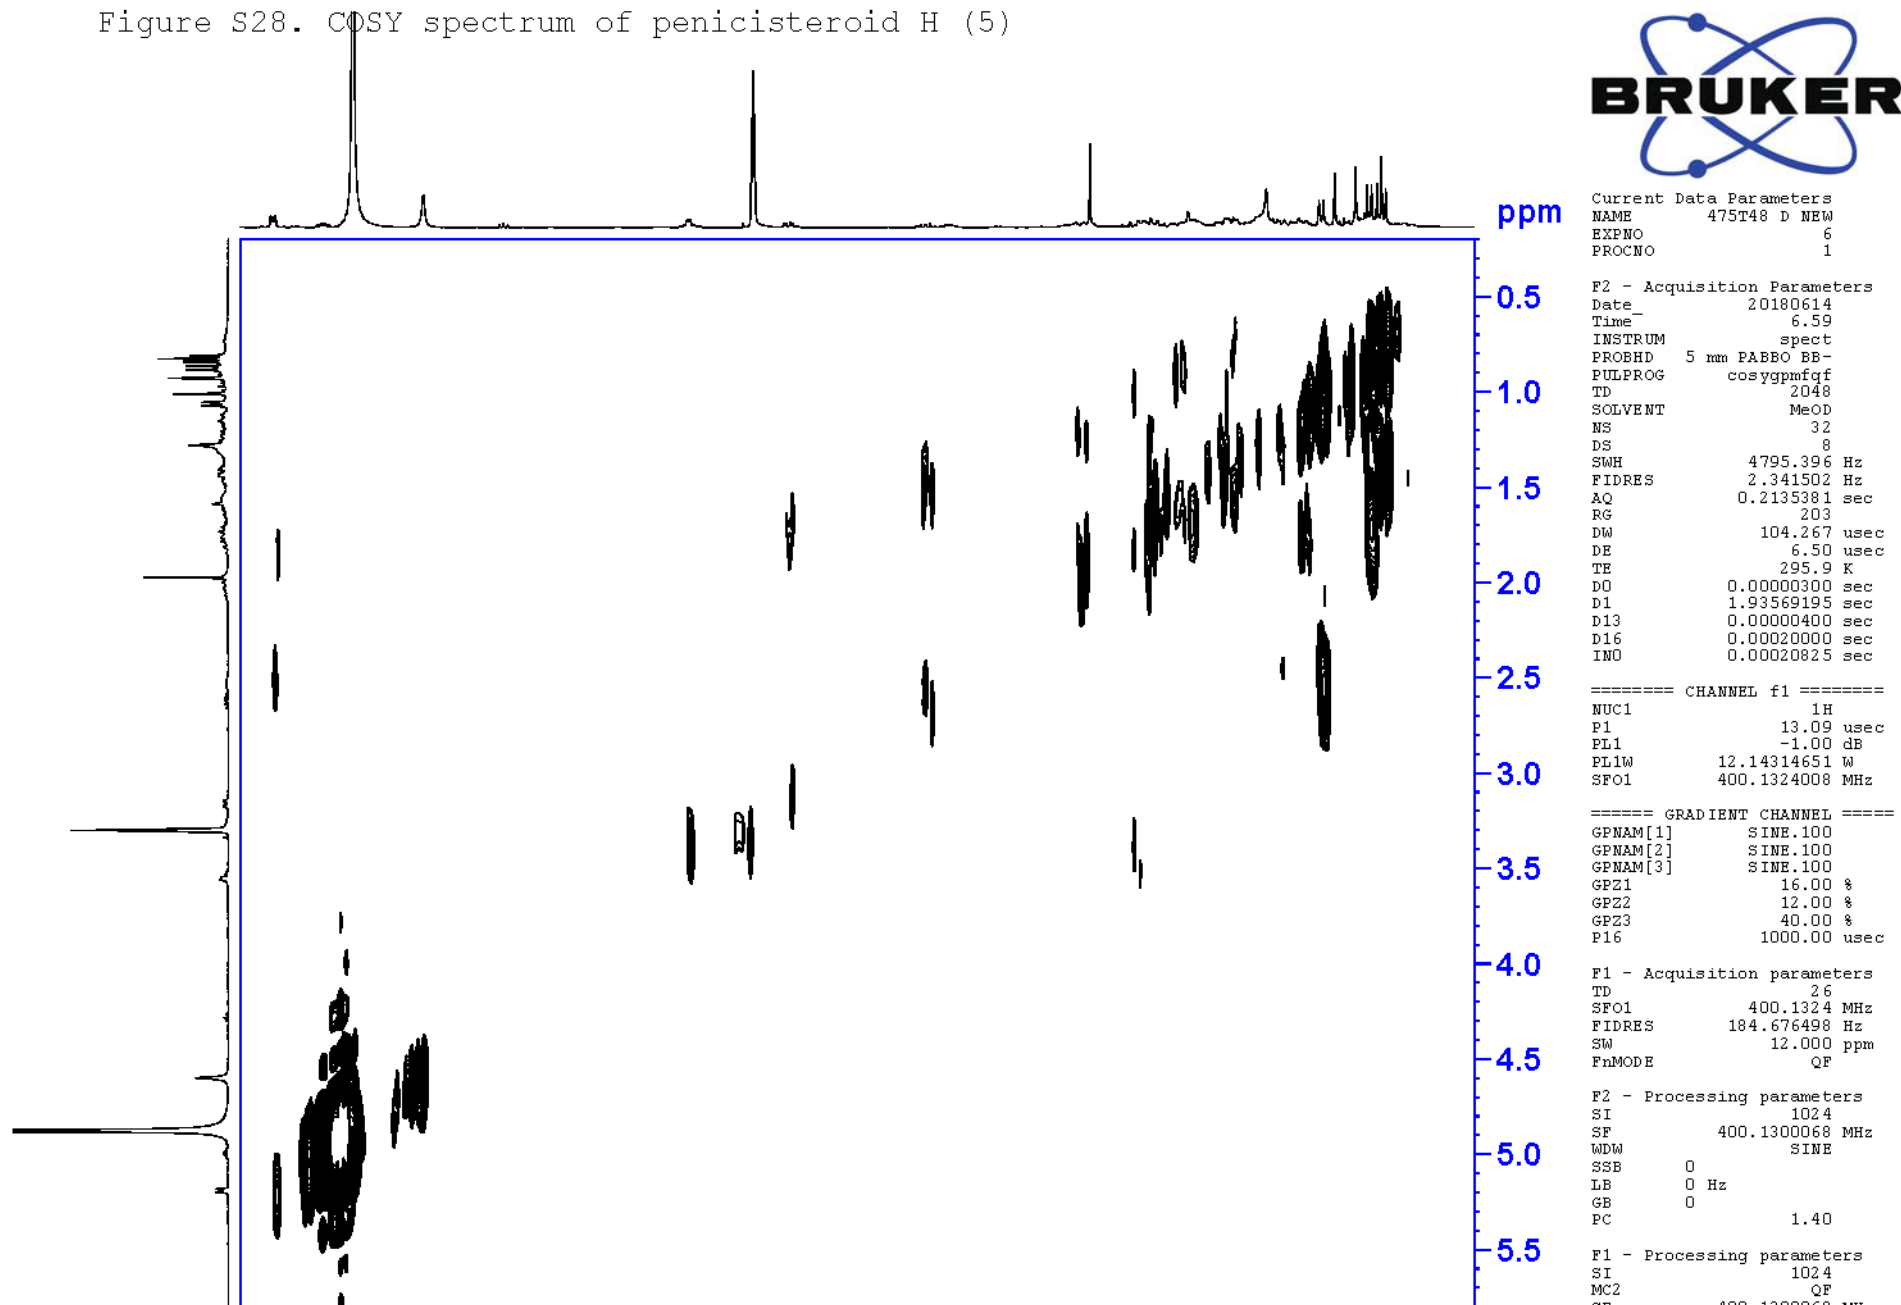

Figure S29. HMBC spectrum of penicisteroid H (5)

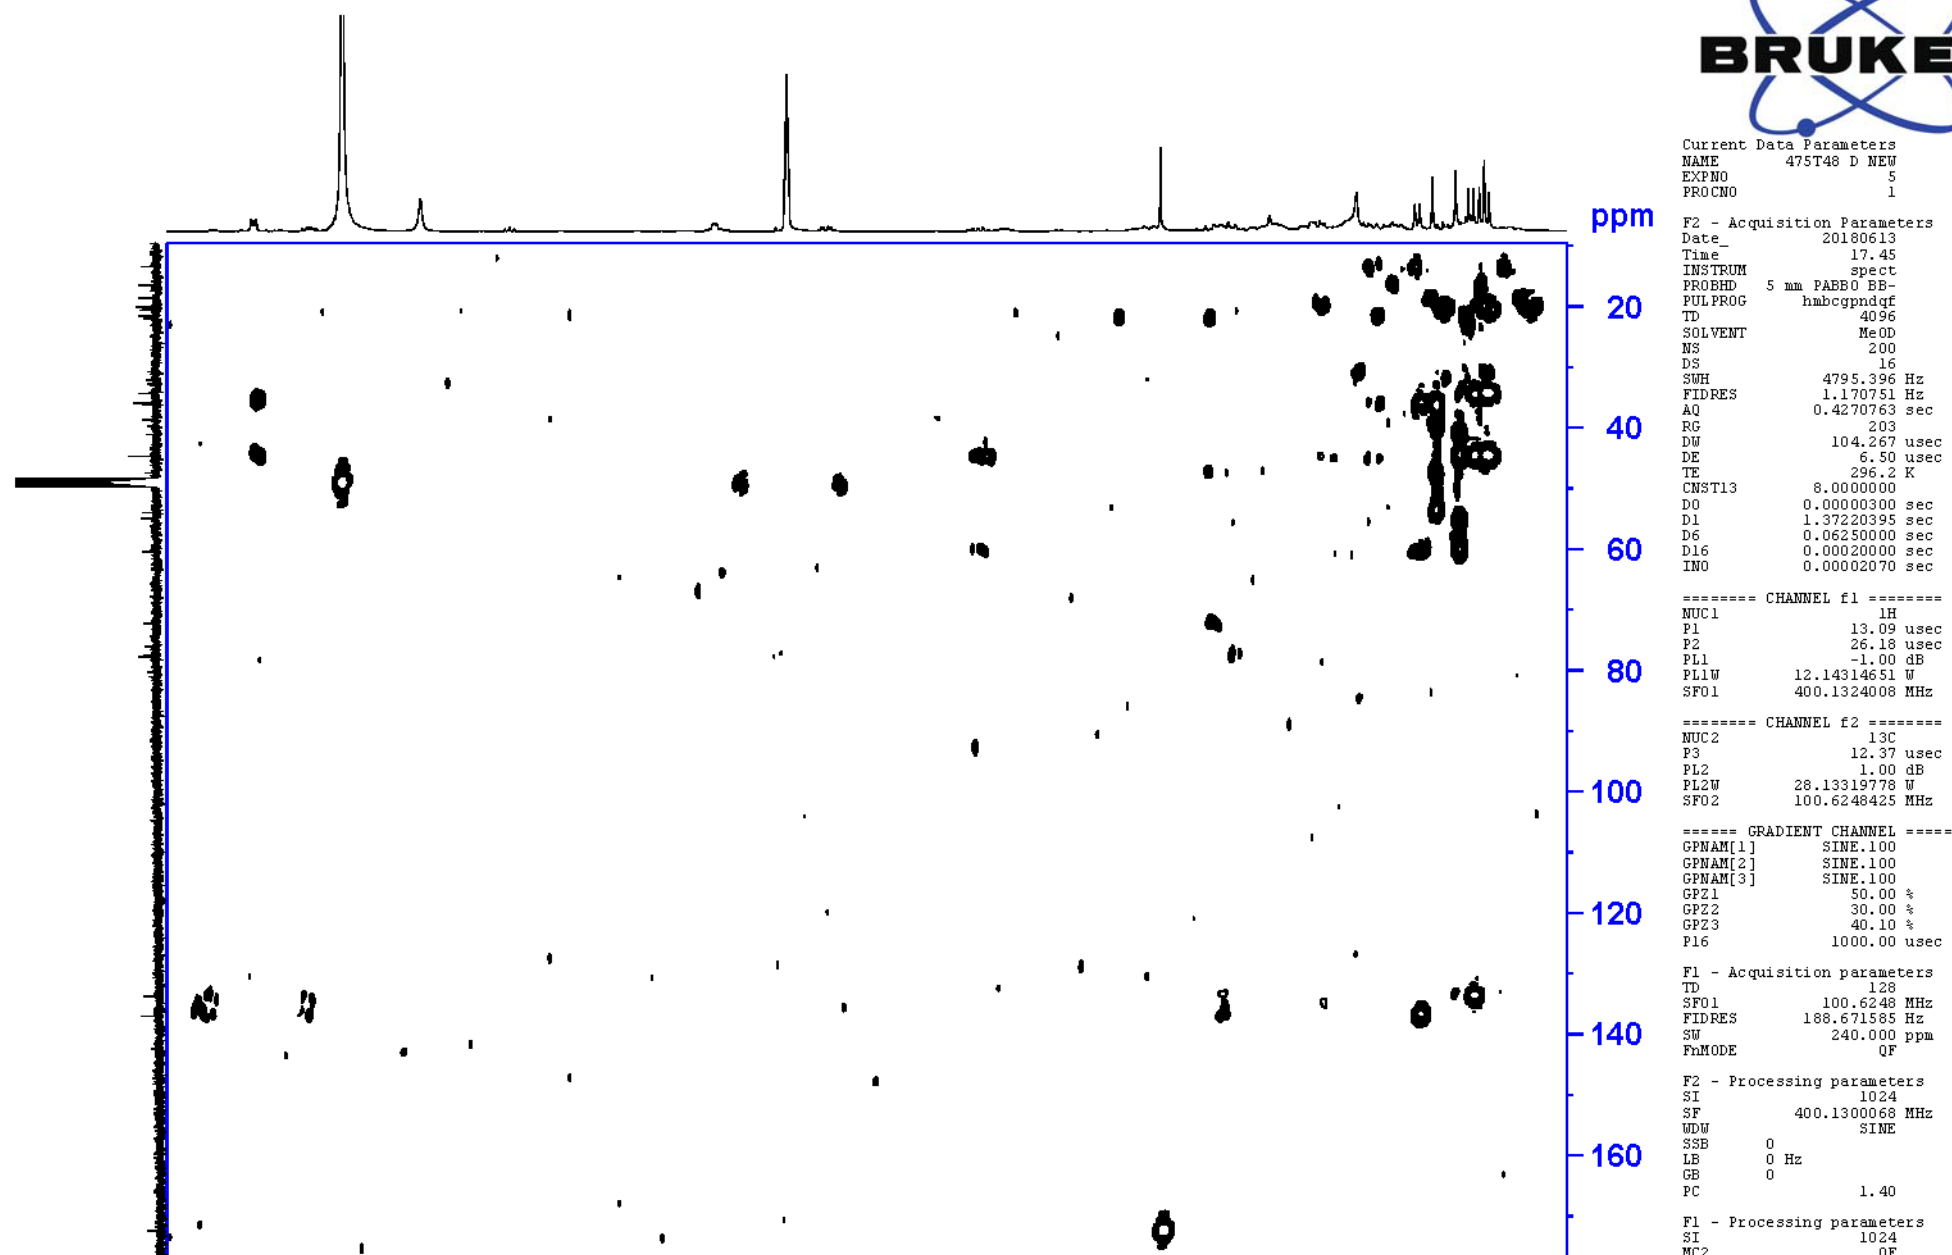

Figure S30. NOESY spectrum of penicisteroid H (5).

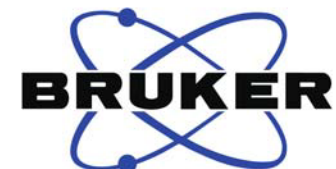

Current Data Parameters  
NAME 475T48 D NEW  
EXPNO 9  
PROCNO 1

F2 - Acquisition Parameters  
Date\_ 20180617  
Time 6.49  
INSTRUM spect  
PROBHD 5 mm PABBO BB-  
PULPROG noesyph  
TD 2048  
SOLVENT MeOD  
NS 80  
DS 4  
SWH 4795.396 Hz  
FIDRES 2.341502 Hz  
AQ 0.2135381 sec  
RG 203  
DW 104.267 usec  
DE 6.50 usec  
TE 296.1 K  
D0 0.00008747 sec  
D1 2.00000000 sec  
D8 0.30000001 sec  
IN0 0.00020825 sec

===== CHANNEL f1 =====  
NUC1 1H  
P1 13.09 usec  
PL1 -1.00 dB  
PL1W 12.14314651 W  
SFO1 400.1324008 MHz

F1 - Acquisition parameters  
TD 62  
SFO1 400.1324 MHz  
FIDRES 77.444984 Hz  
SW 12.000 ppm  
FnMODE States-TPPI

F2 - Processing parameters  
SI 1024  
SF 400.1300068 MHz  
WDW QSINE  
SSB 2  
LB 0 Hz  
GB 0  
PC 1.00

F1 - Processing parameters  
SI 1024  
MC2 States-TPPI  
SF 400.1300068 MHz

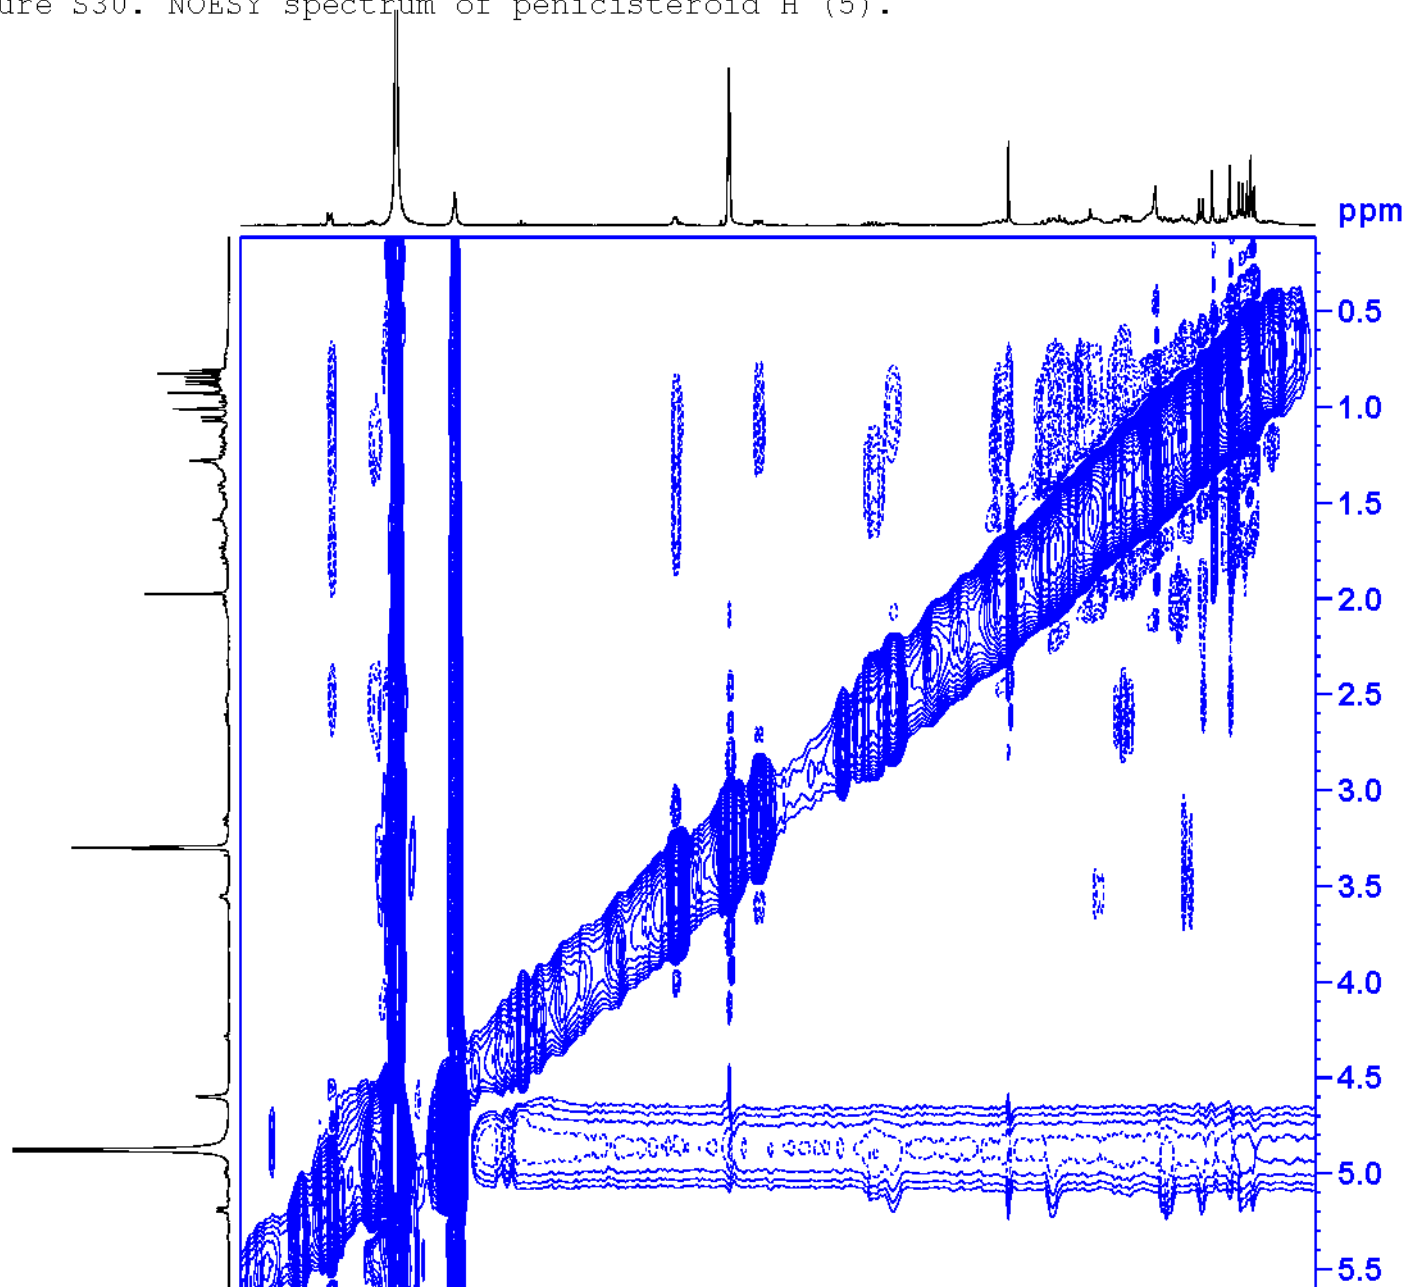

Supplement: s1 [file s1]
